# Supplementary figures and images for: An adapted deep convolutional RNN model for spatio-temporal prediction of wind speed extremes in the short-to-medium range for wind energy applications
Source: Copernicus journal article supplement (doi:10.5194/egusphere-2022-599), 2022-07-12

2019-02-11 00:00

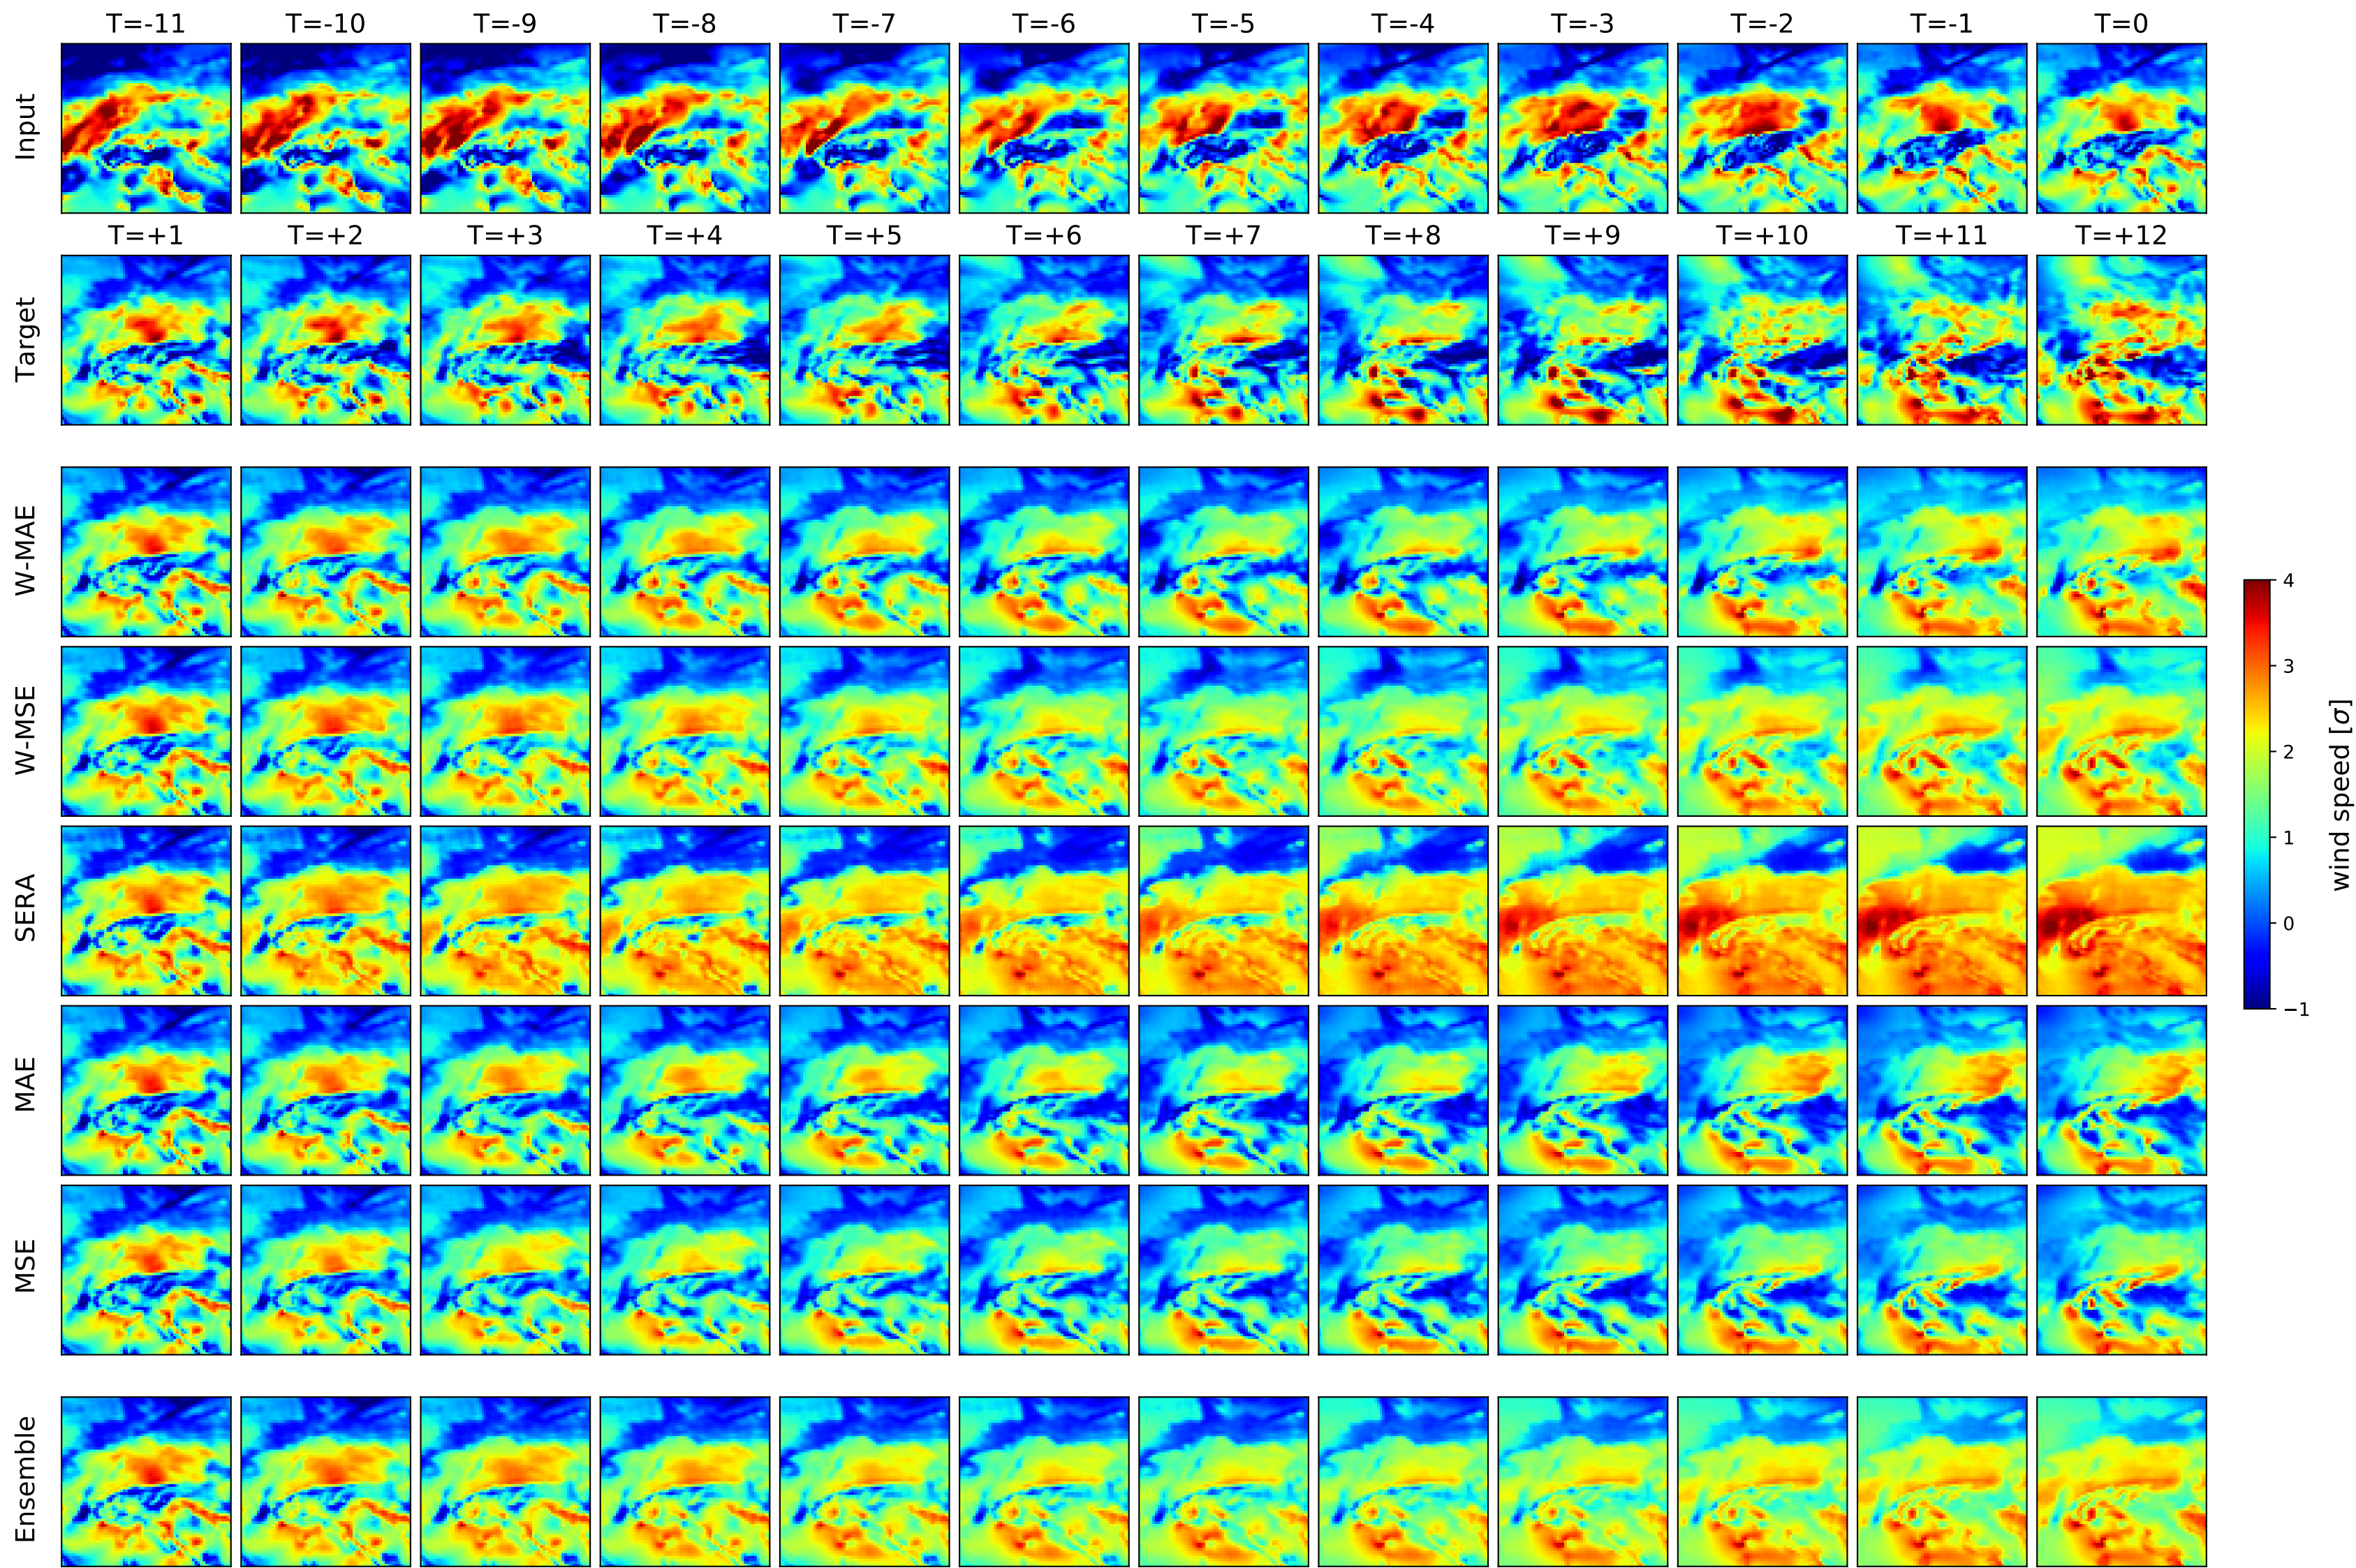

Supplement: Supplementary file 1 [file example_101.pdf › example_forecasts/example_101.pdf]

2020-05-17 00:00

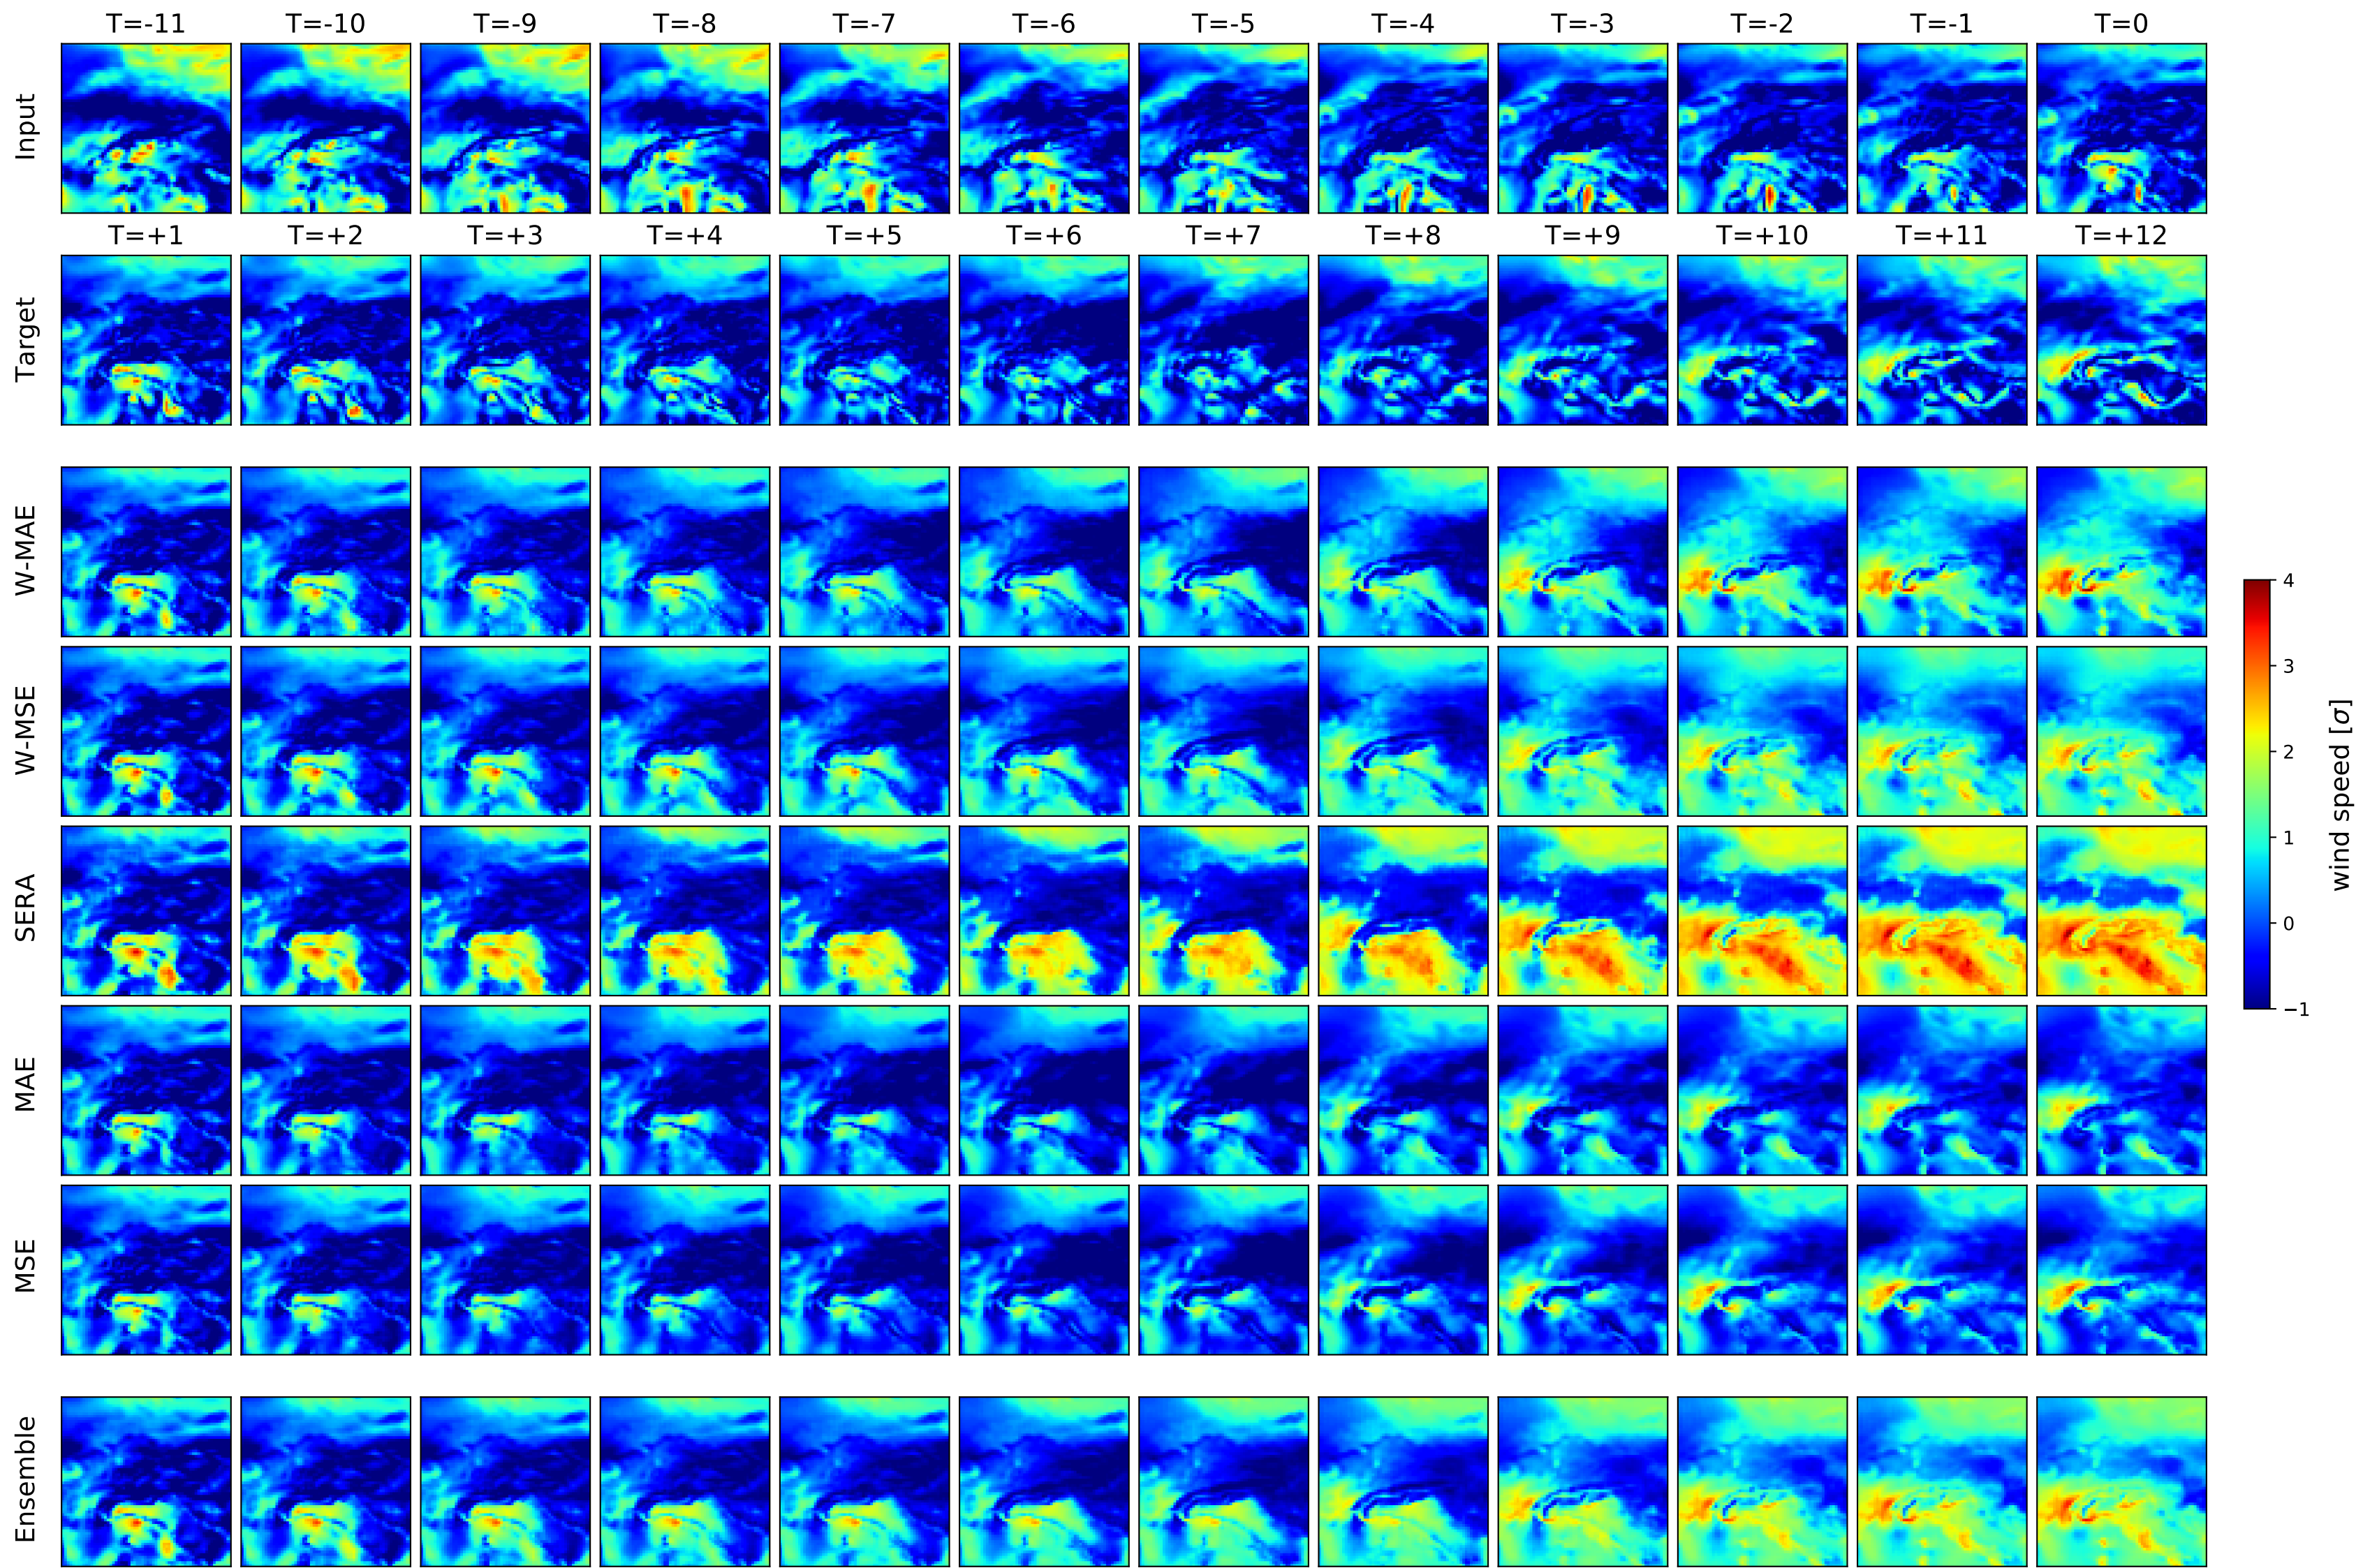

Supplement: Supplementary file 2 [file example_1023.pdf › example_forecasts/example_1023.pdf]

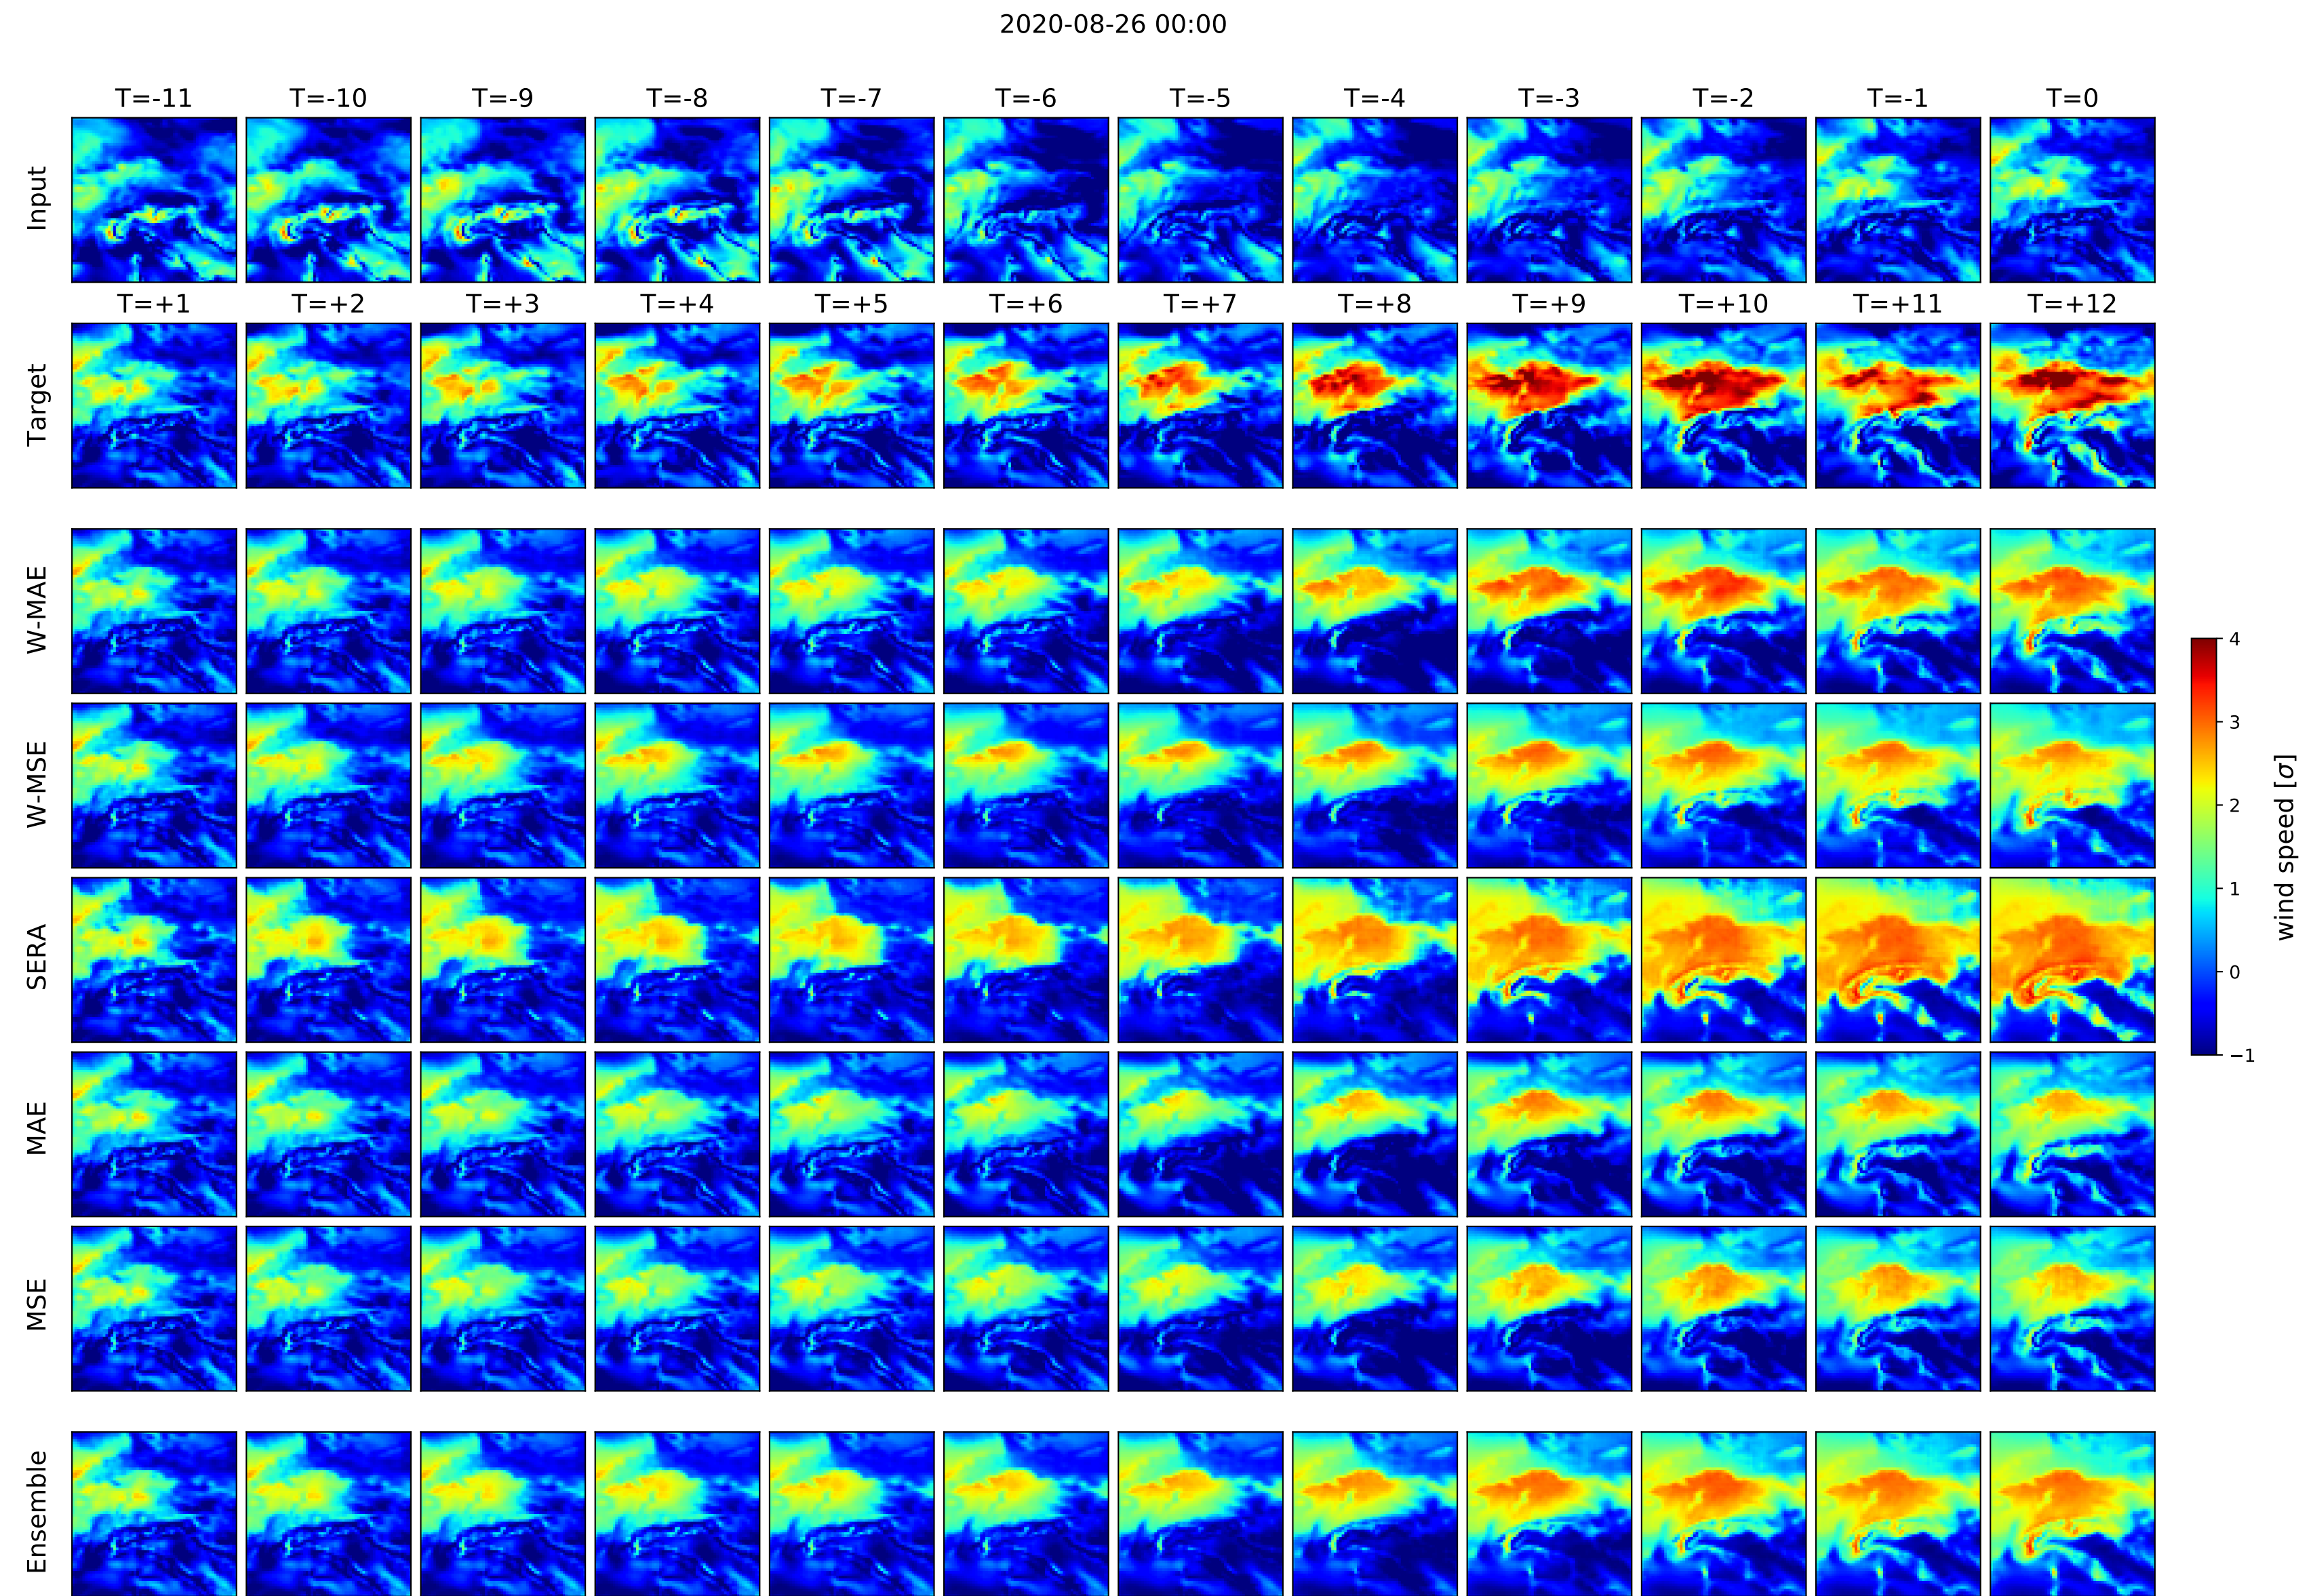

Supplement: Supplementary file 3 [file example_1225.pdf › example_forecasts/example_1225.pdf]

2020-11-05 00:00

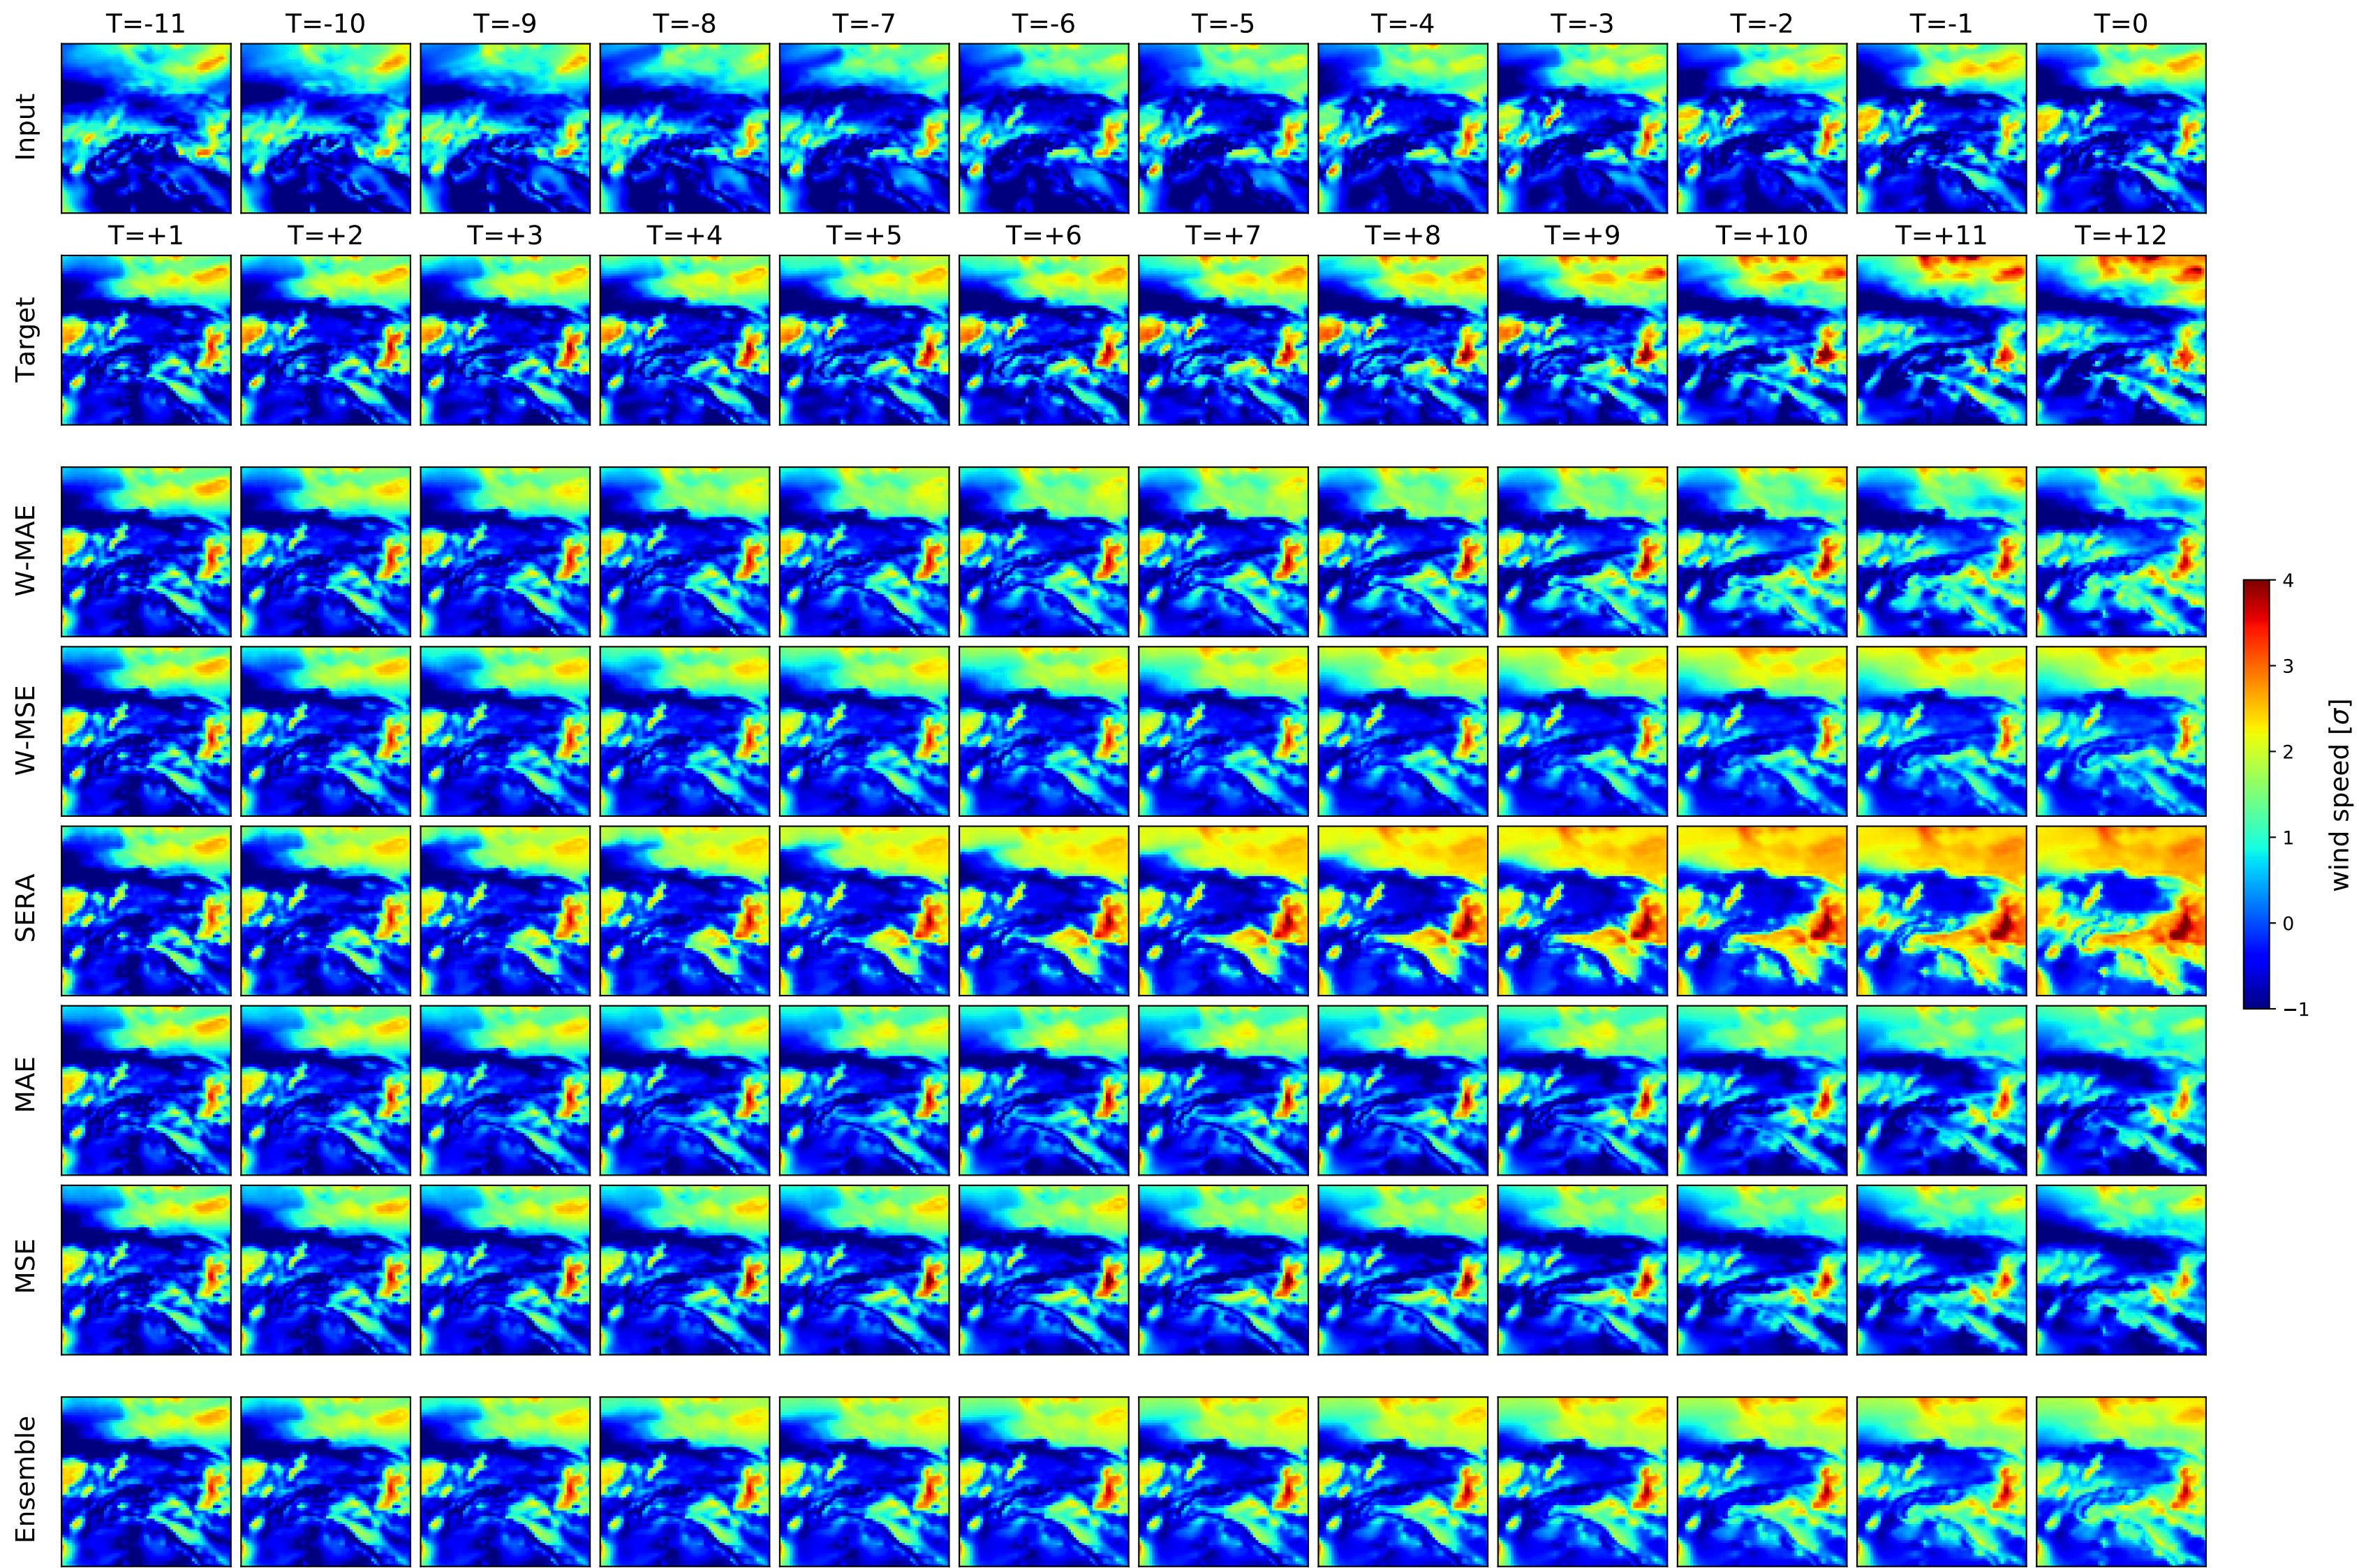

Supplement: Supplementary file 4 [file example_1367.pdf › example_forecasts/example_1367.pdf]

2019-03-04 00:00

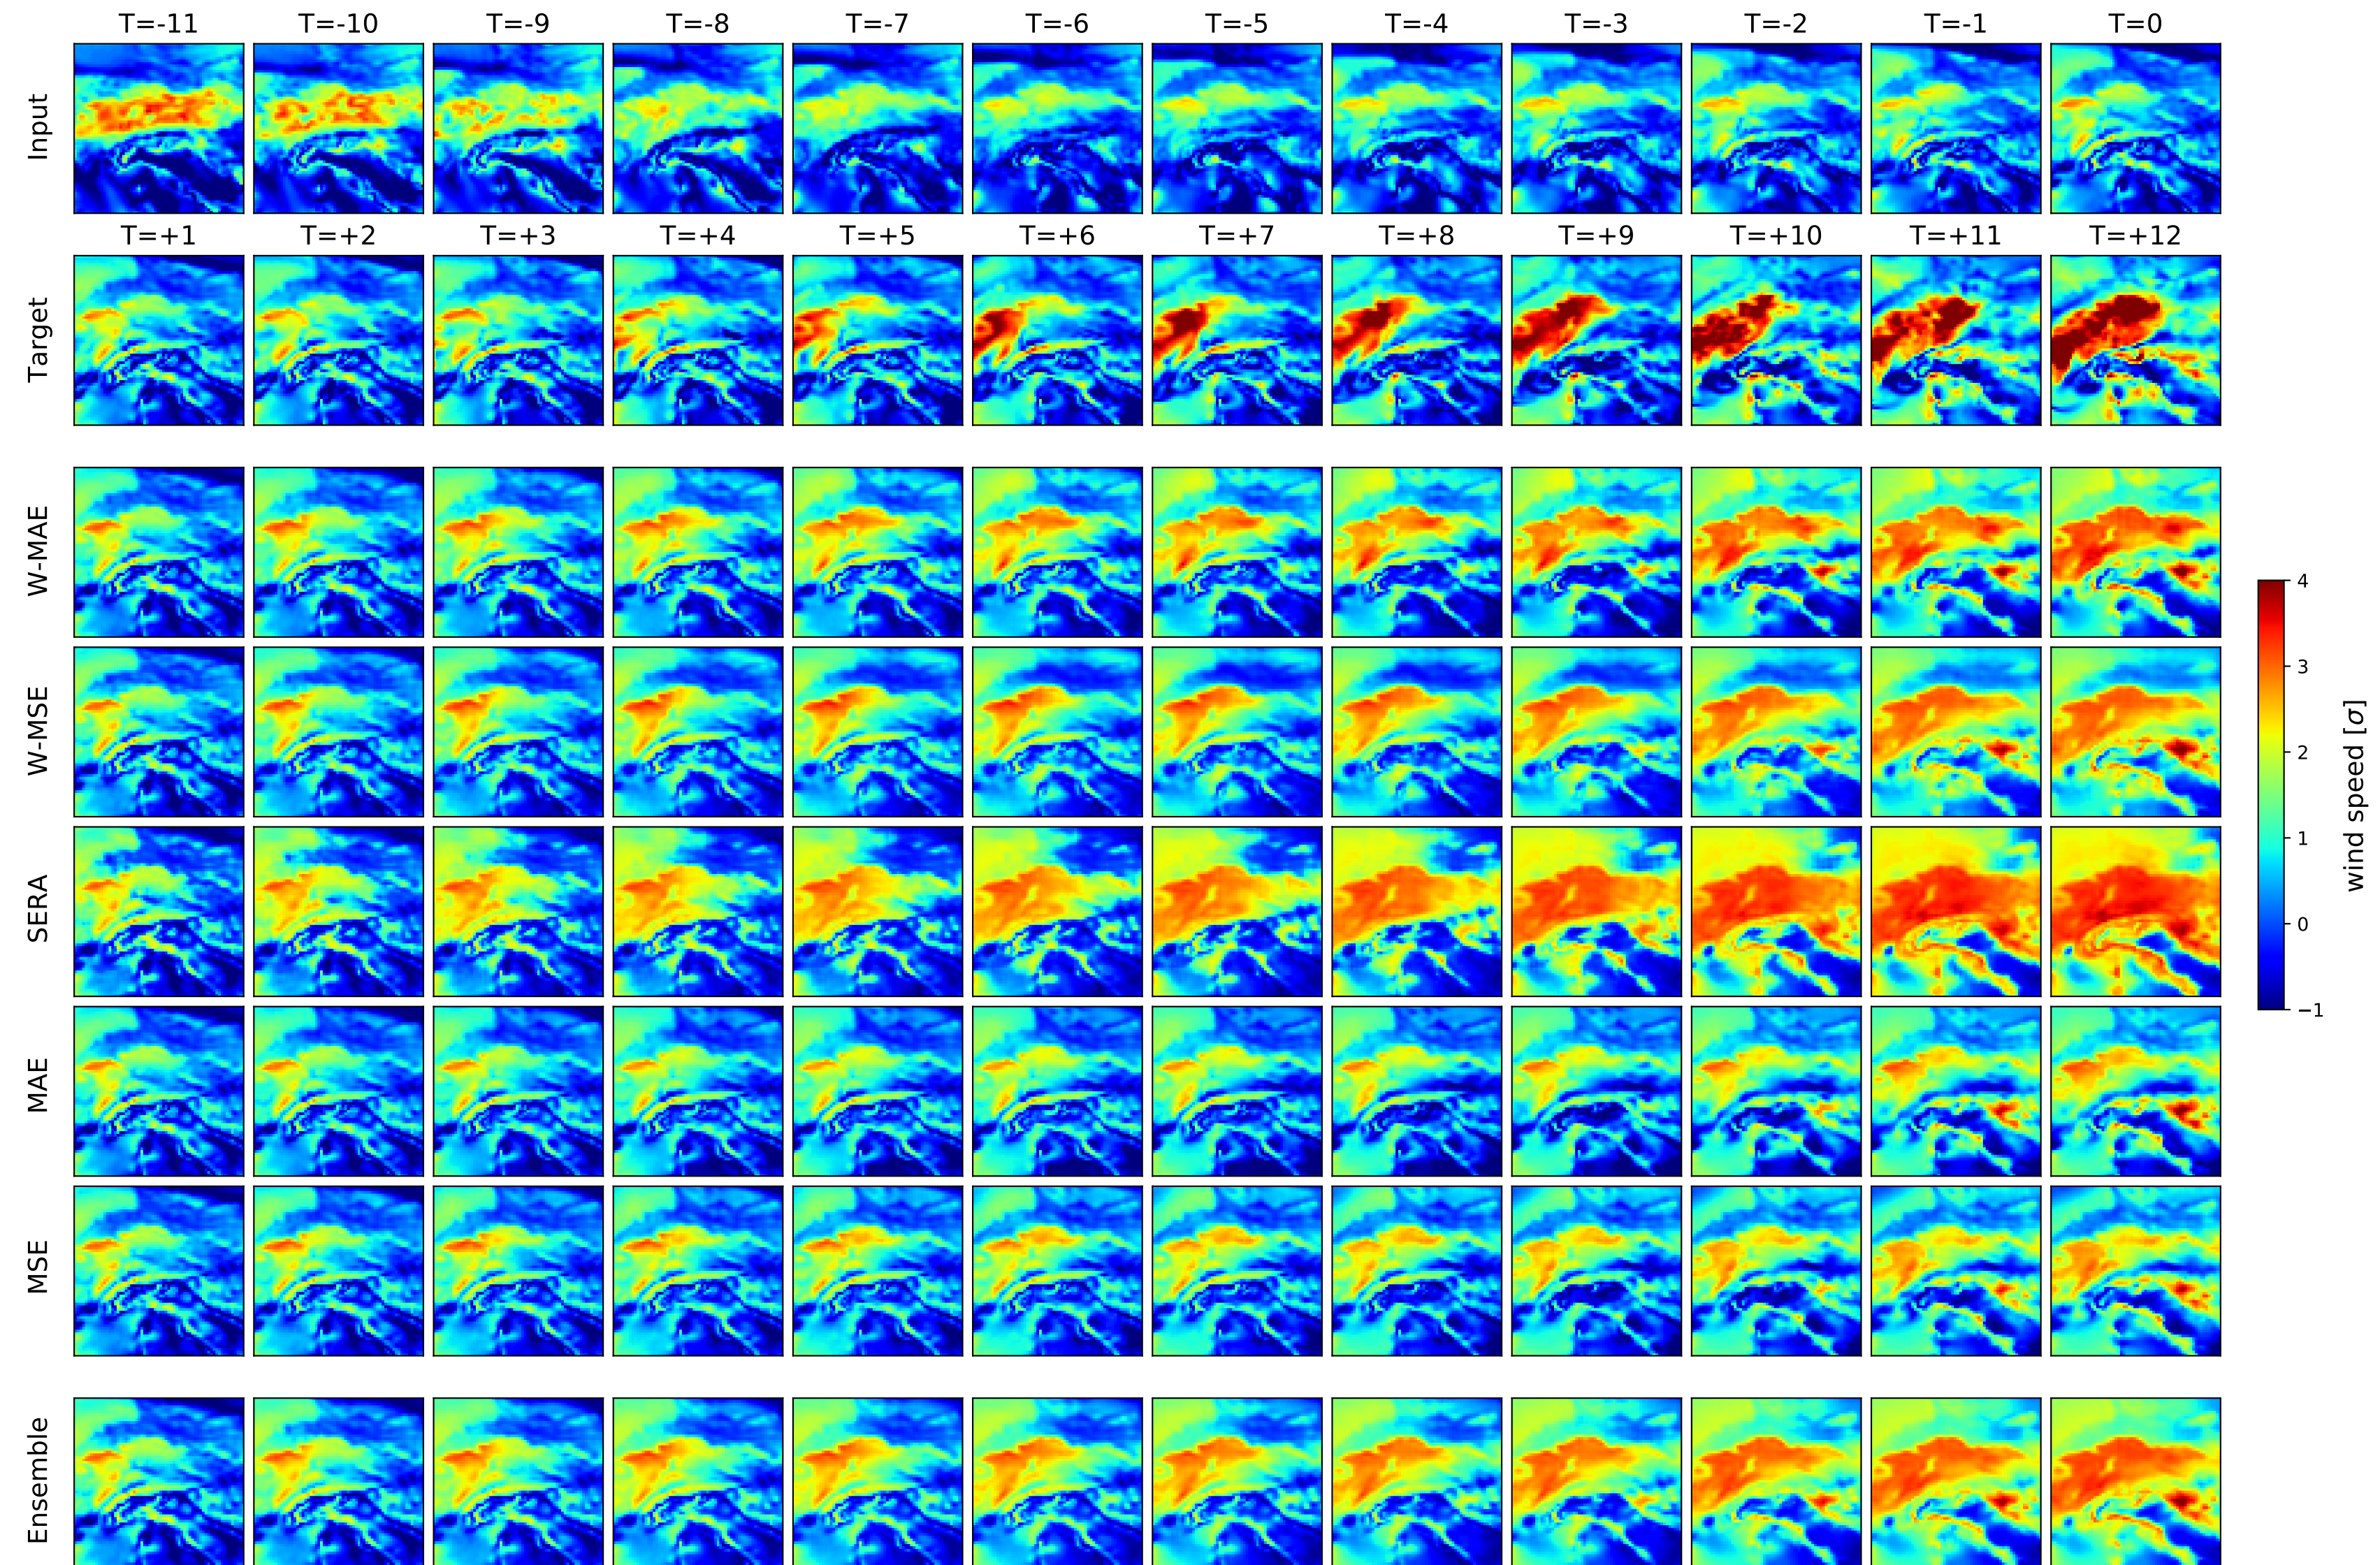

Supplement: Supplementary file 5 [file example_143.pdf › example_forecasts/example_143.pdf]

2019-03-09 00:00

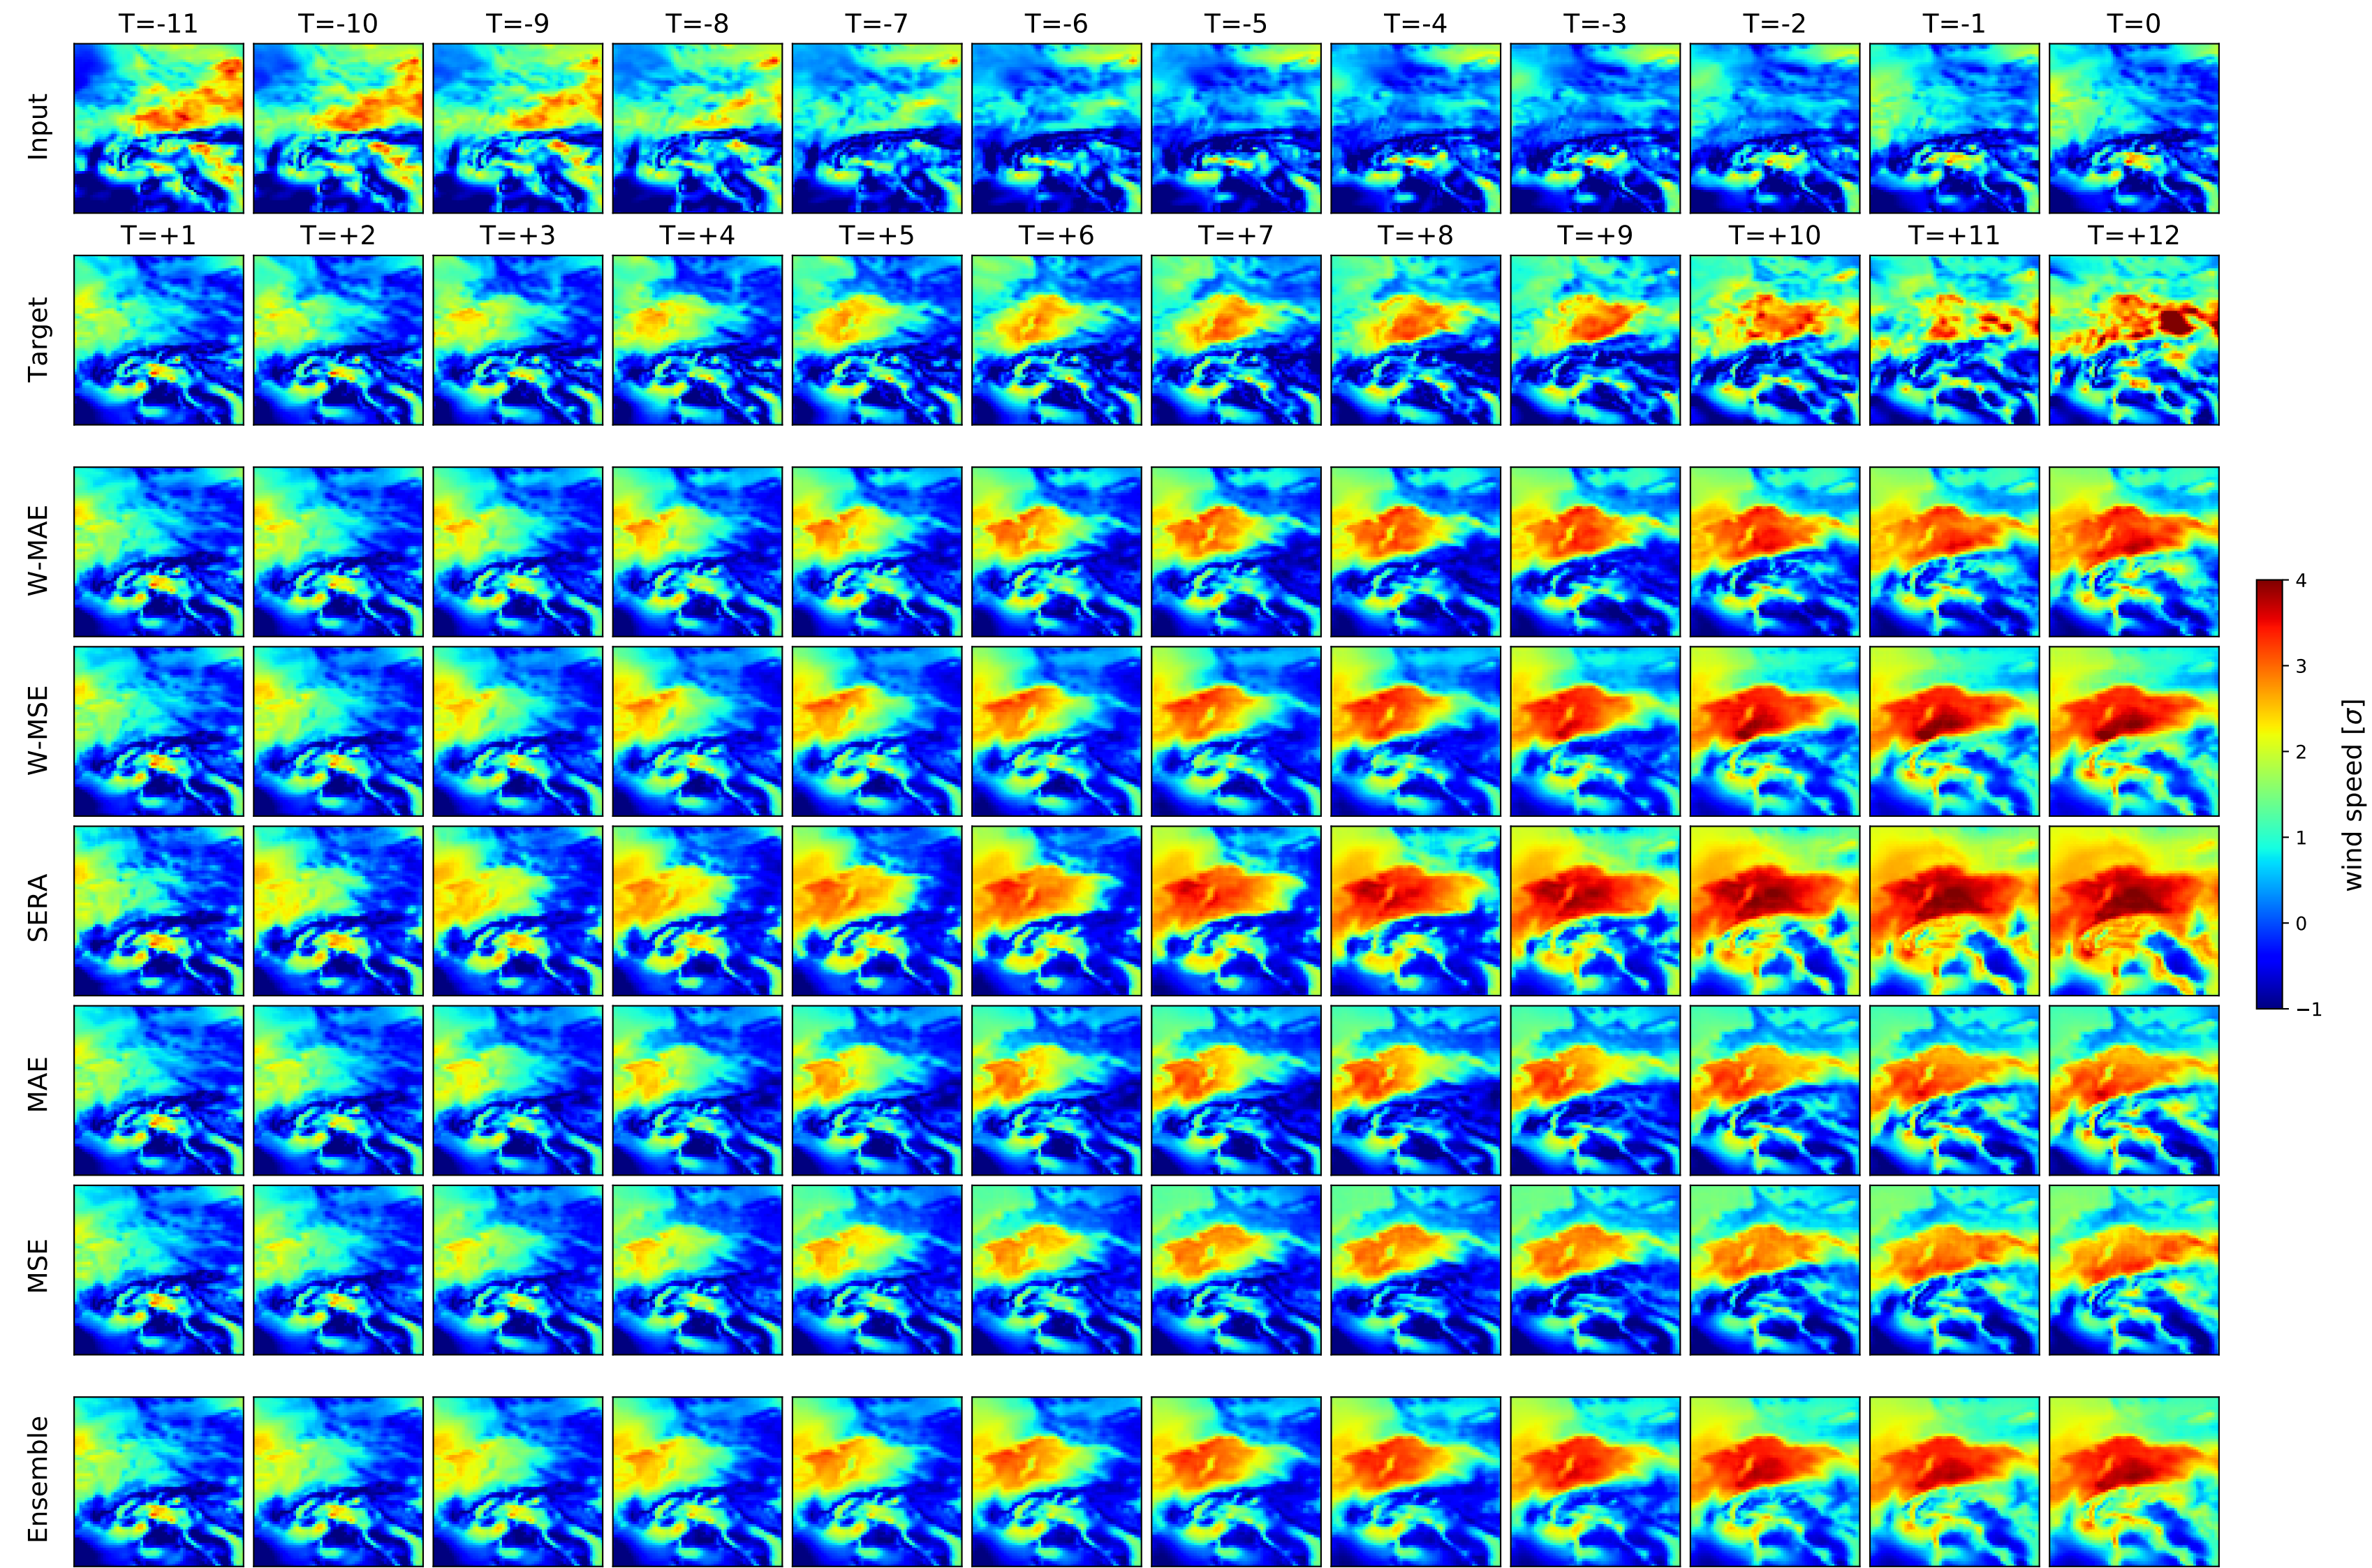

Supplement: Supplementary file 6 [file example_153.pdf › example_forecasts/example_153.pdf]

2019-03-10 00:00

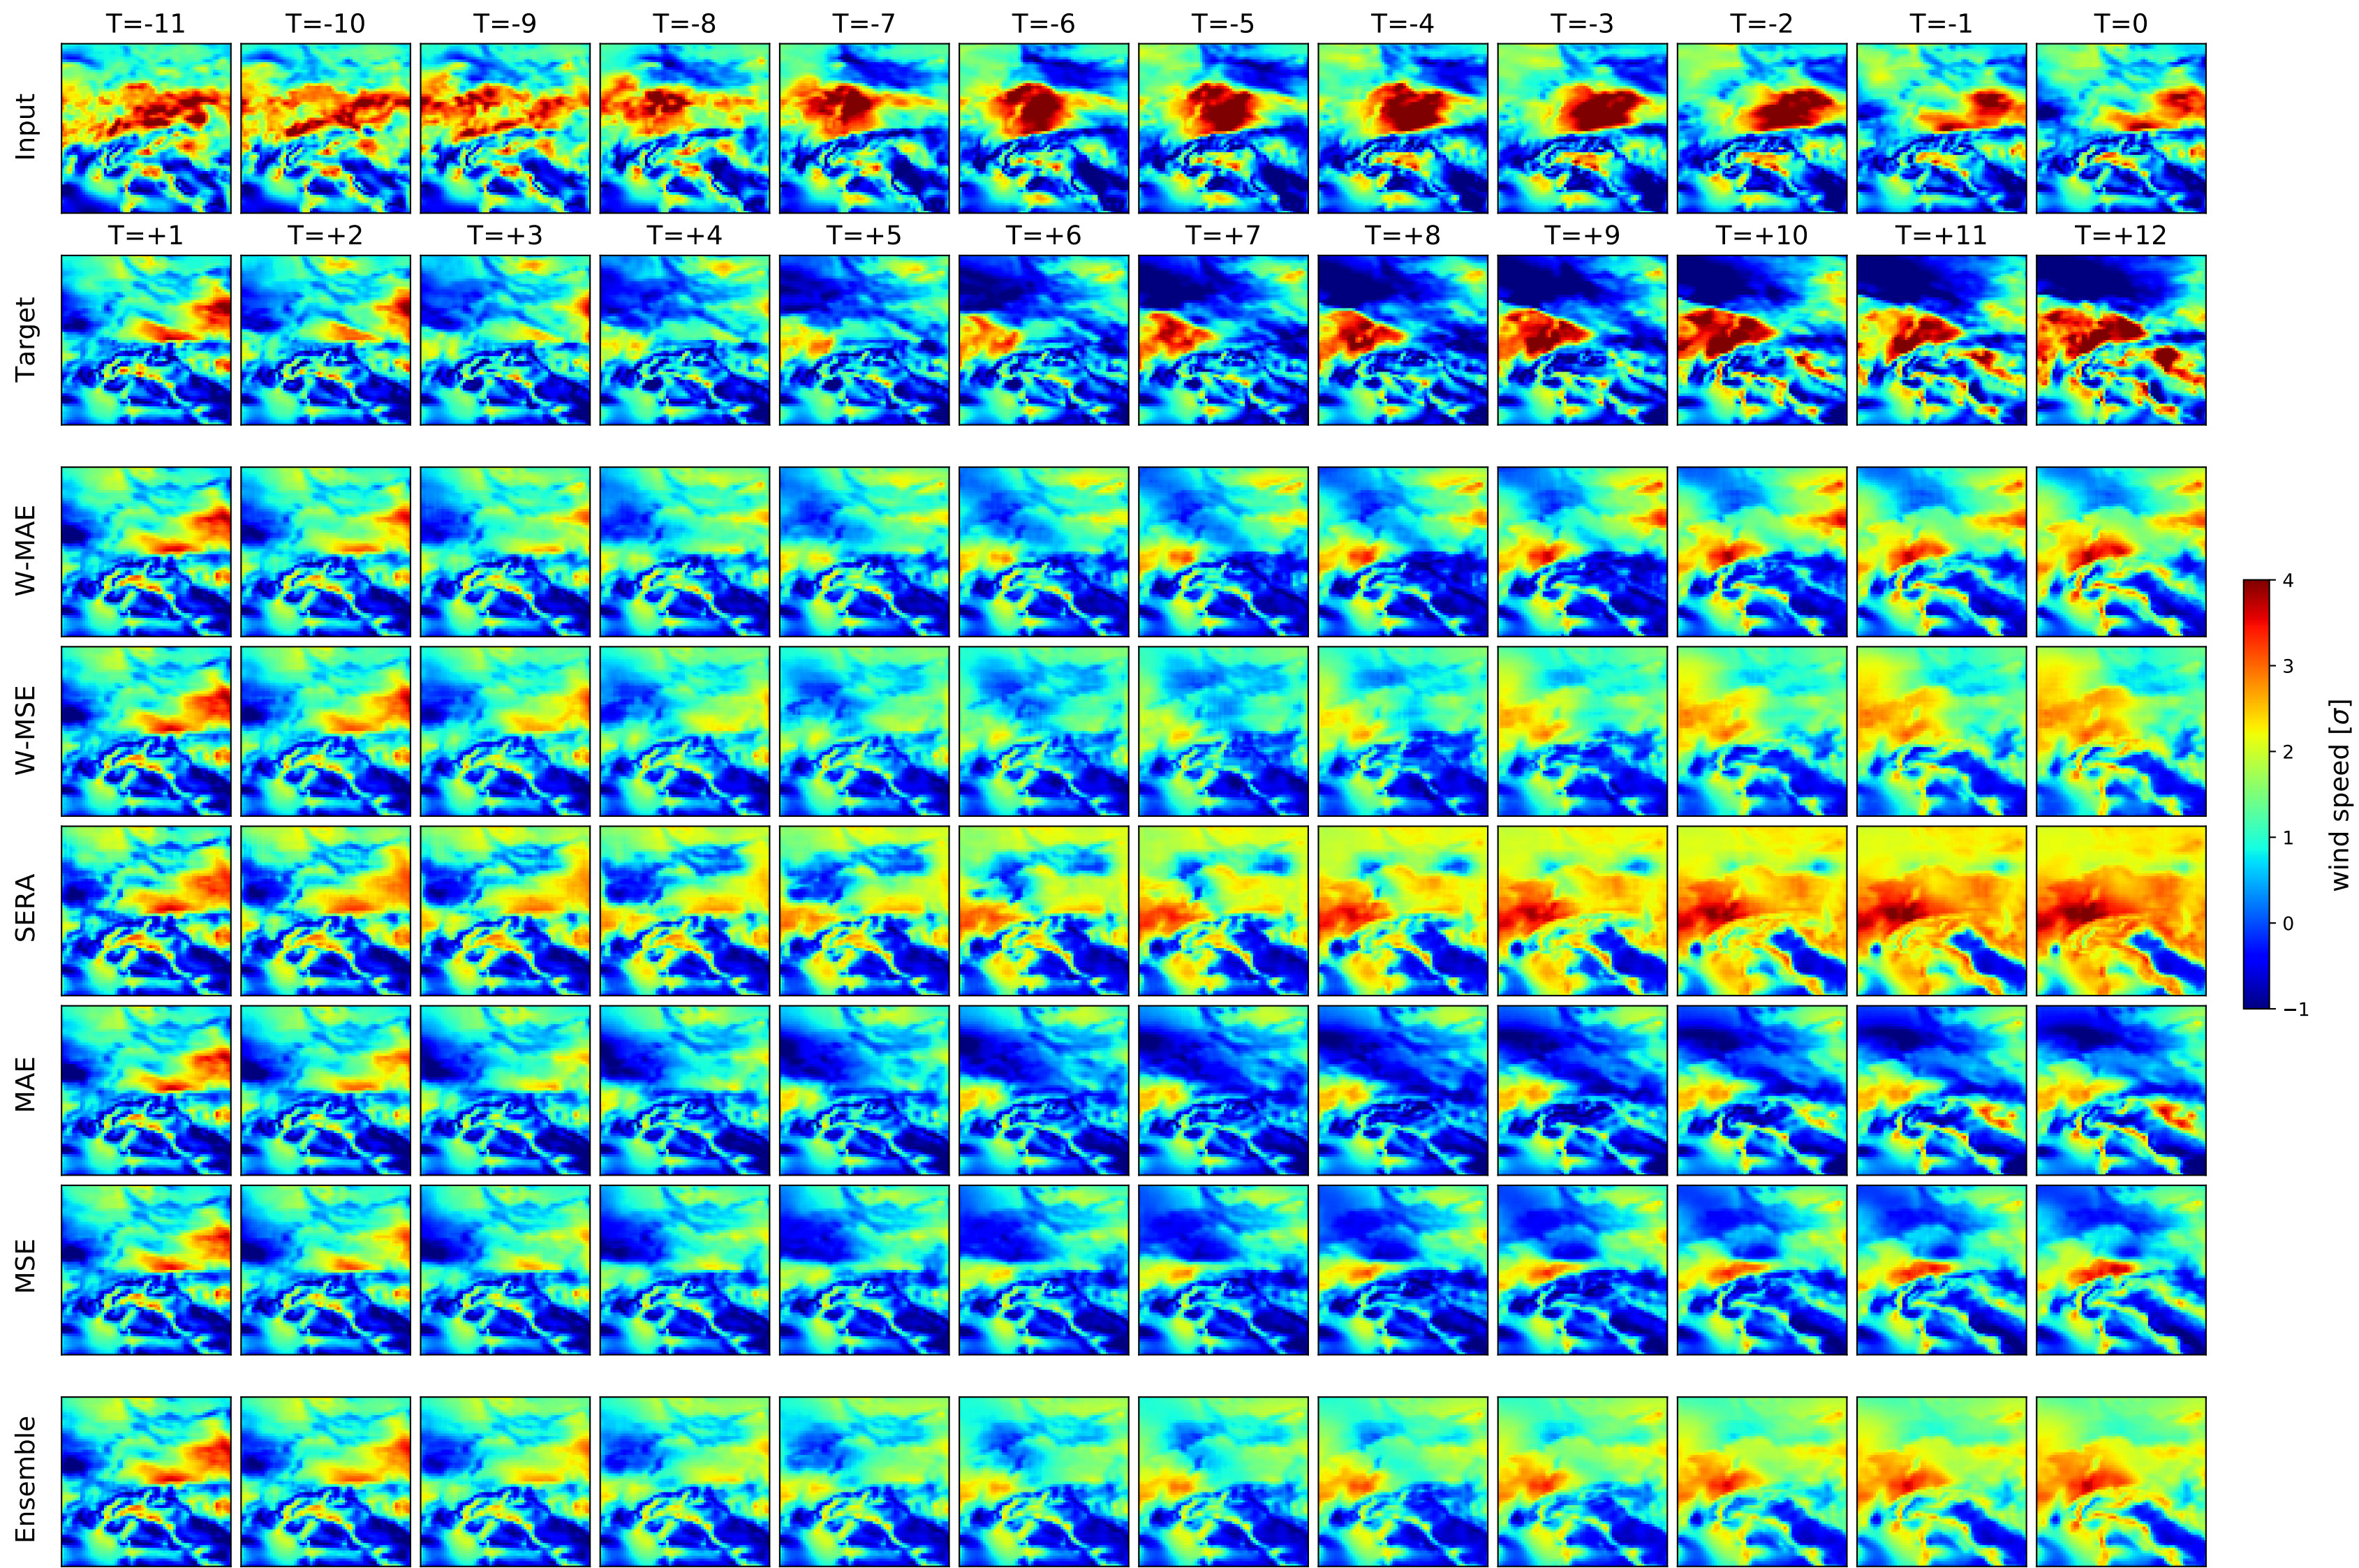

Supplement: Supplementary file 7 [file example_155.pdf › example_forecasts/example_155.pdf]

2019-03-11 12:00

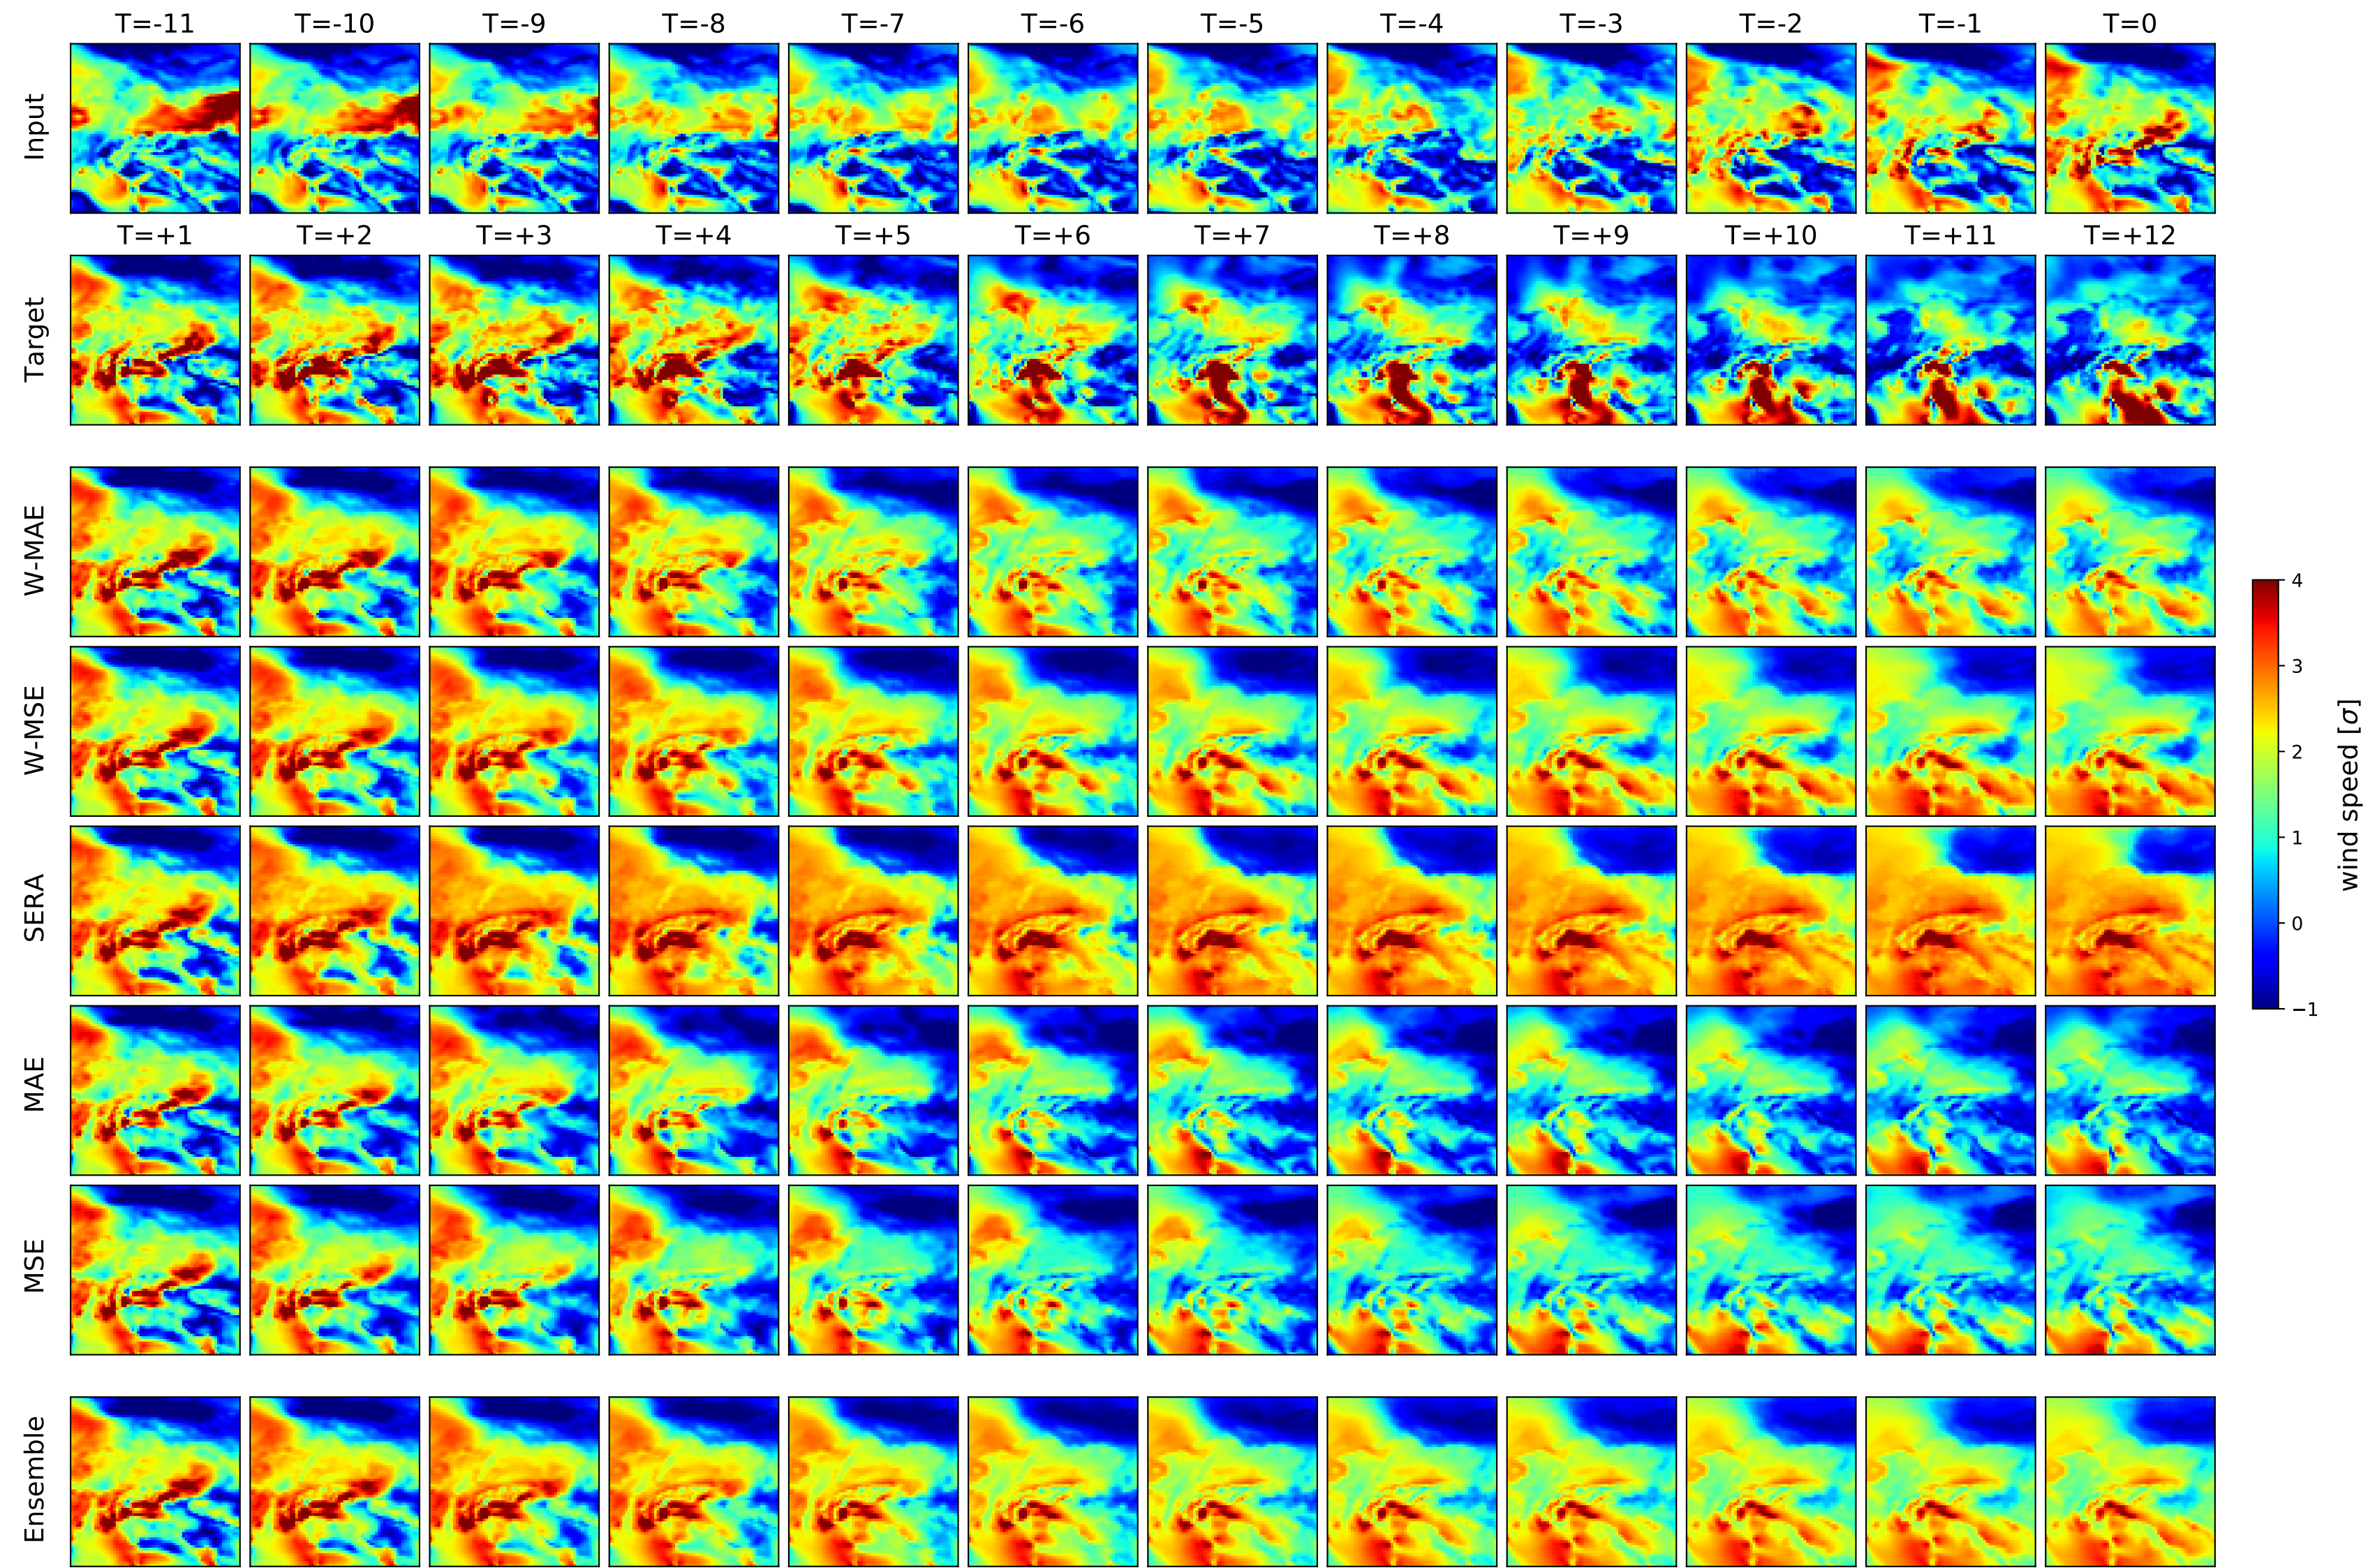

Supplement: Supplementary file 8 [file example_158.pdf › example_forecasts/example_158.pdf]

2019-03-14 12:00

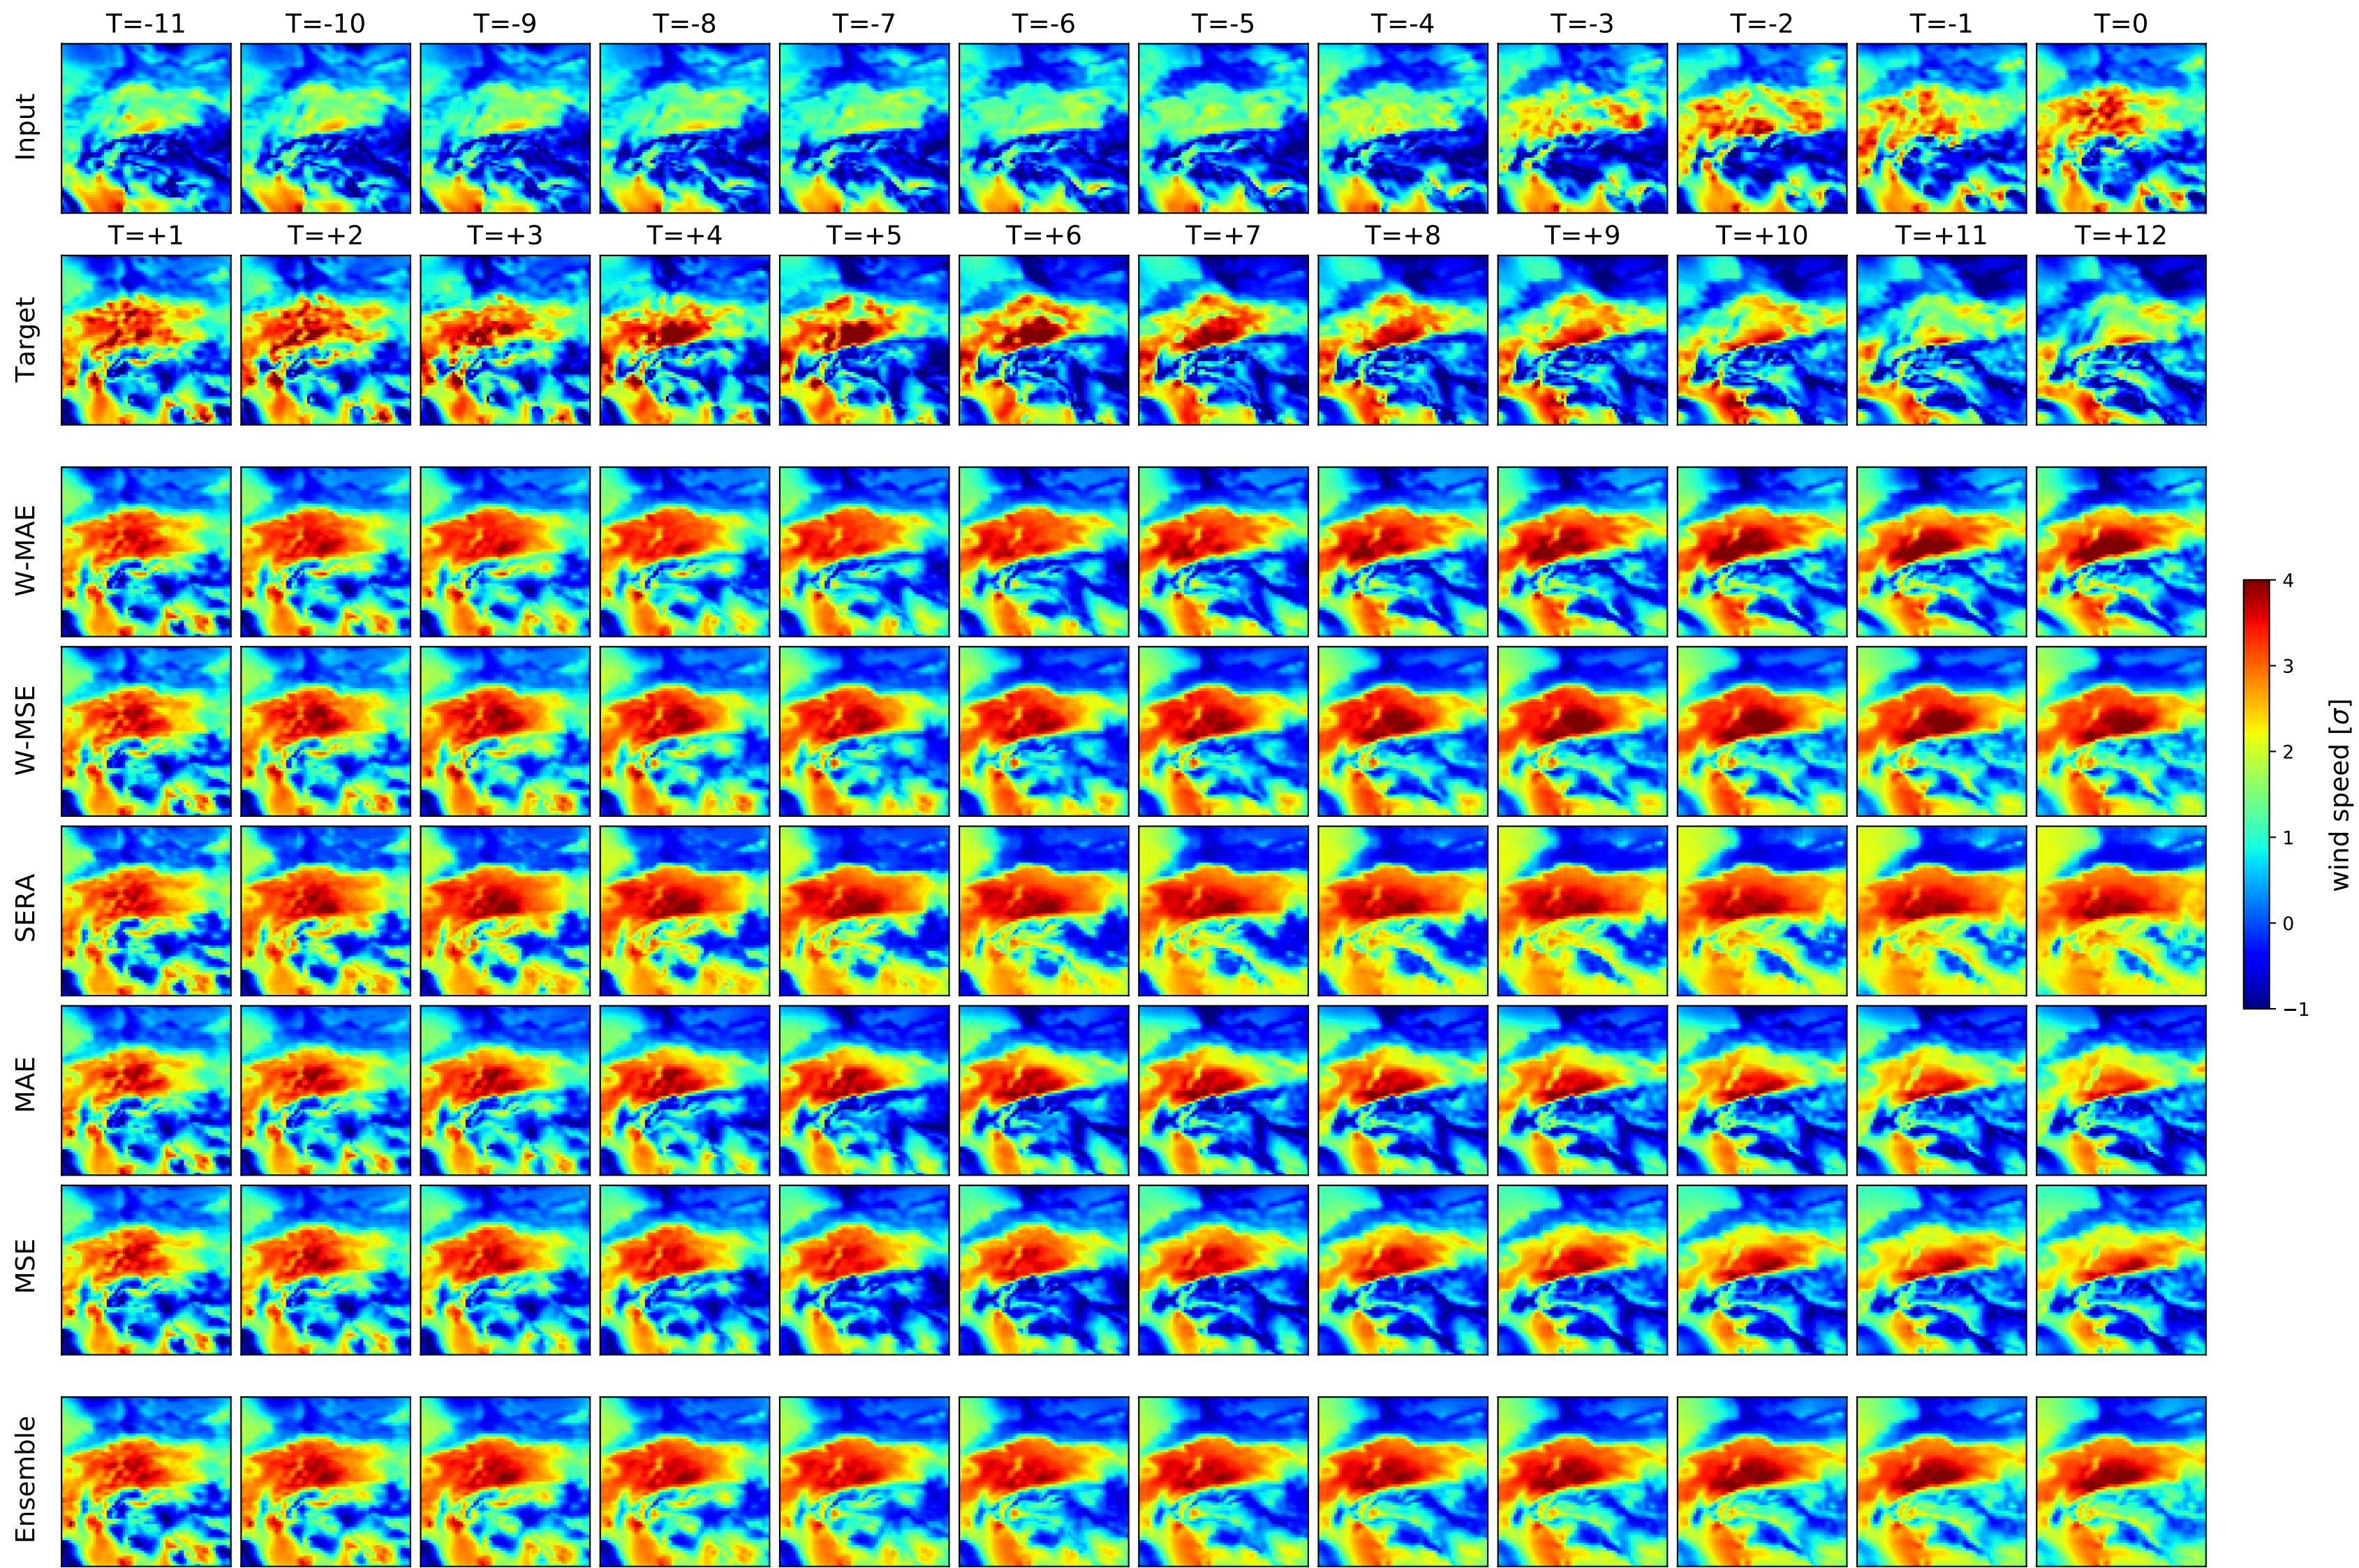

Supplement: Supplementary file 9 [file example_164.pdf › example_forecasts/example_164.pdf]

2019-03-17 00:00

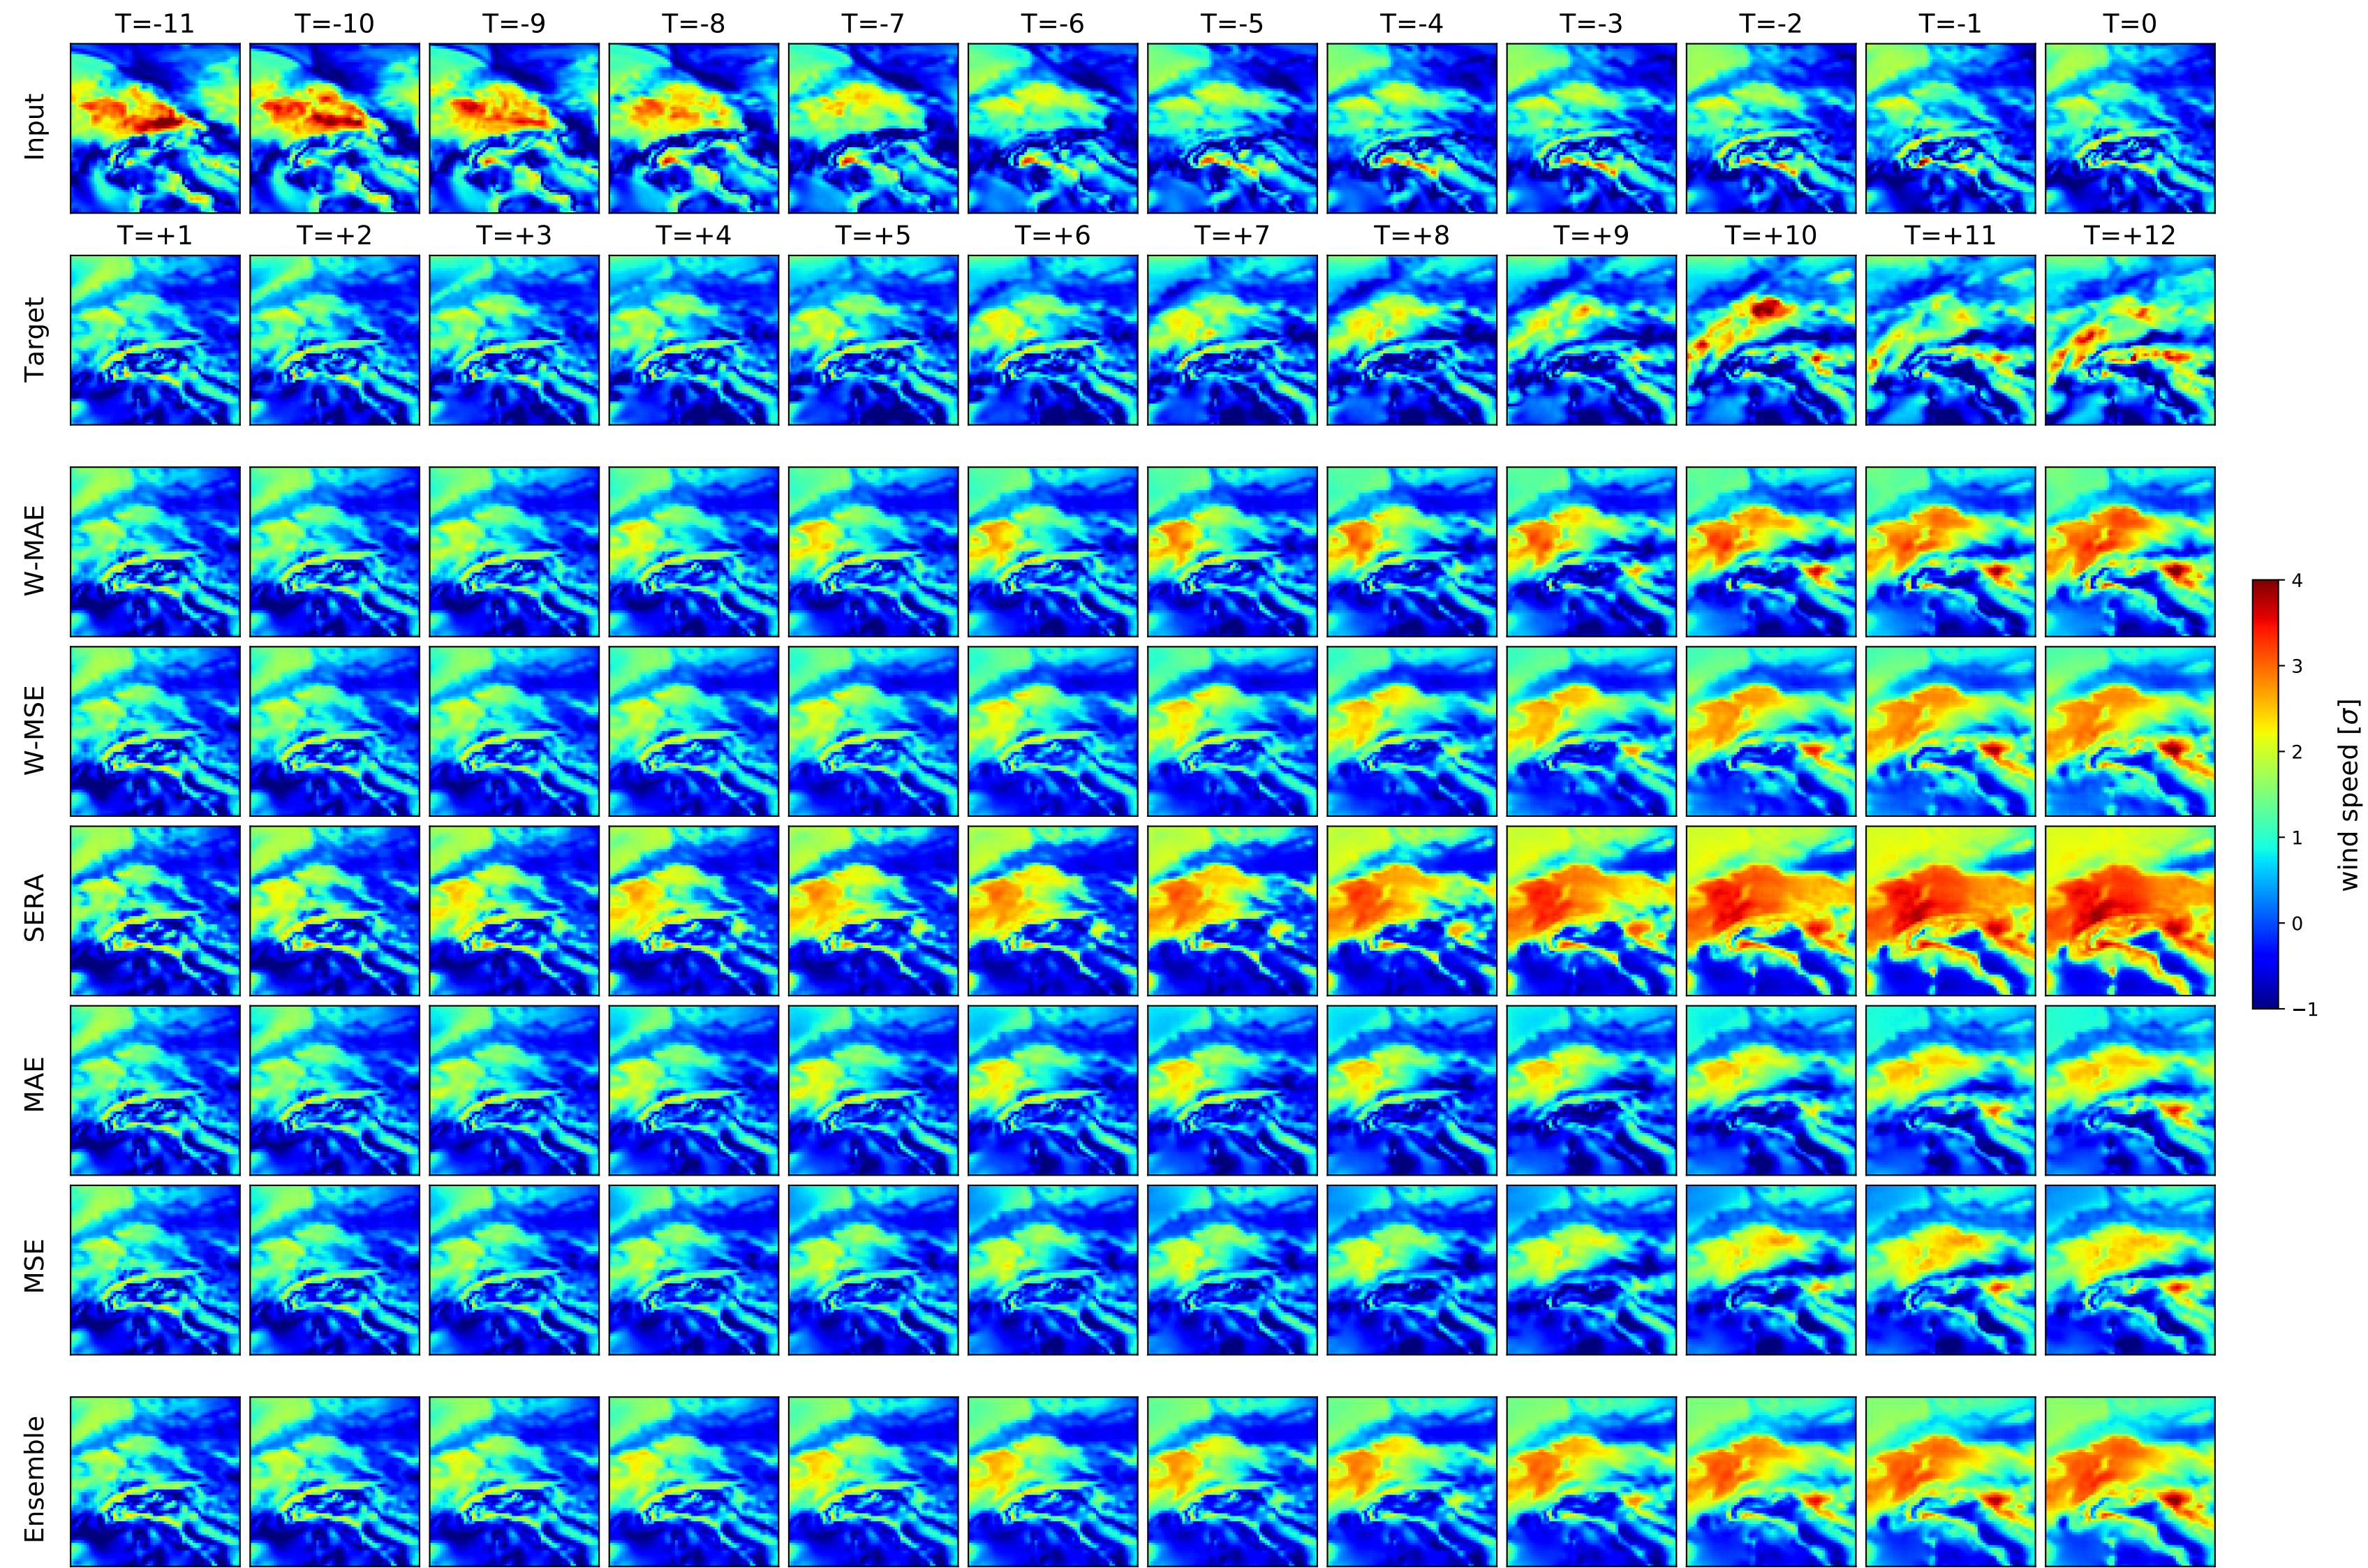

Supplement: Supplementary file 10 [file example_169.pdf › example_forecasts/example_169.pdf]

2018-12-31 00:00

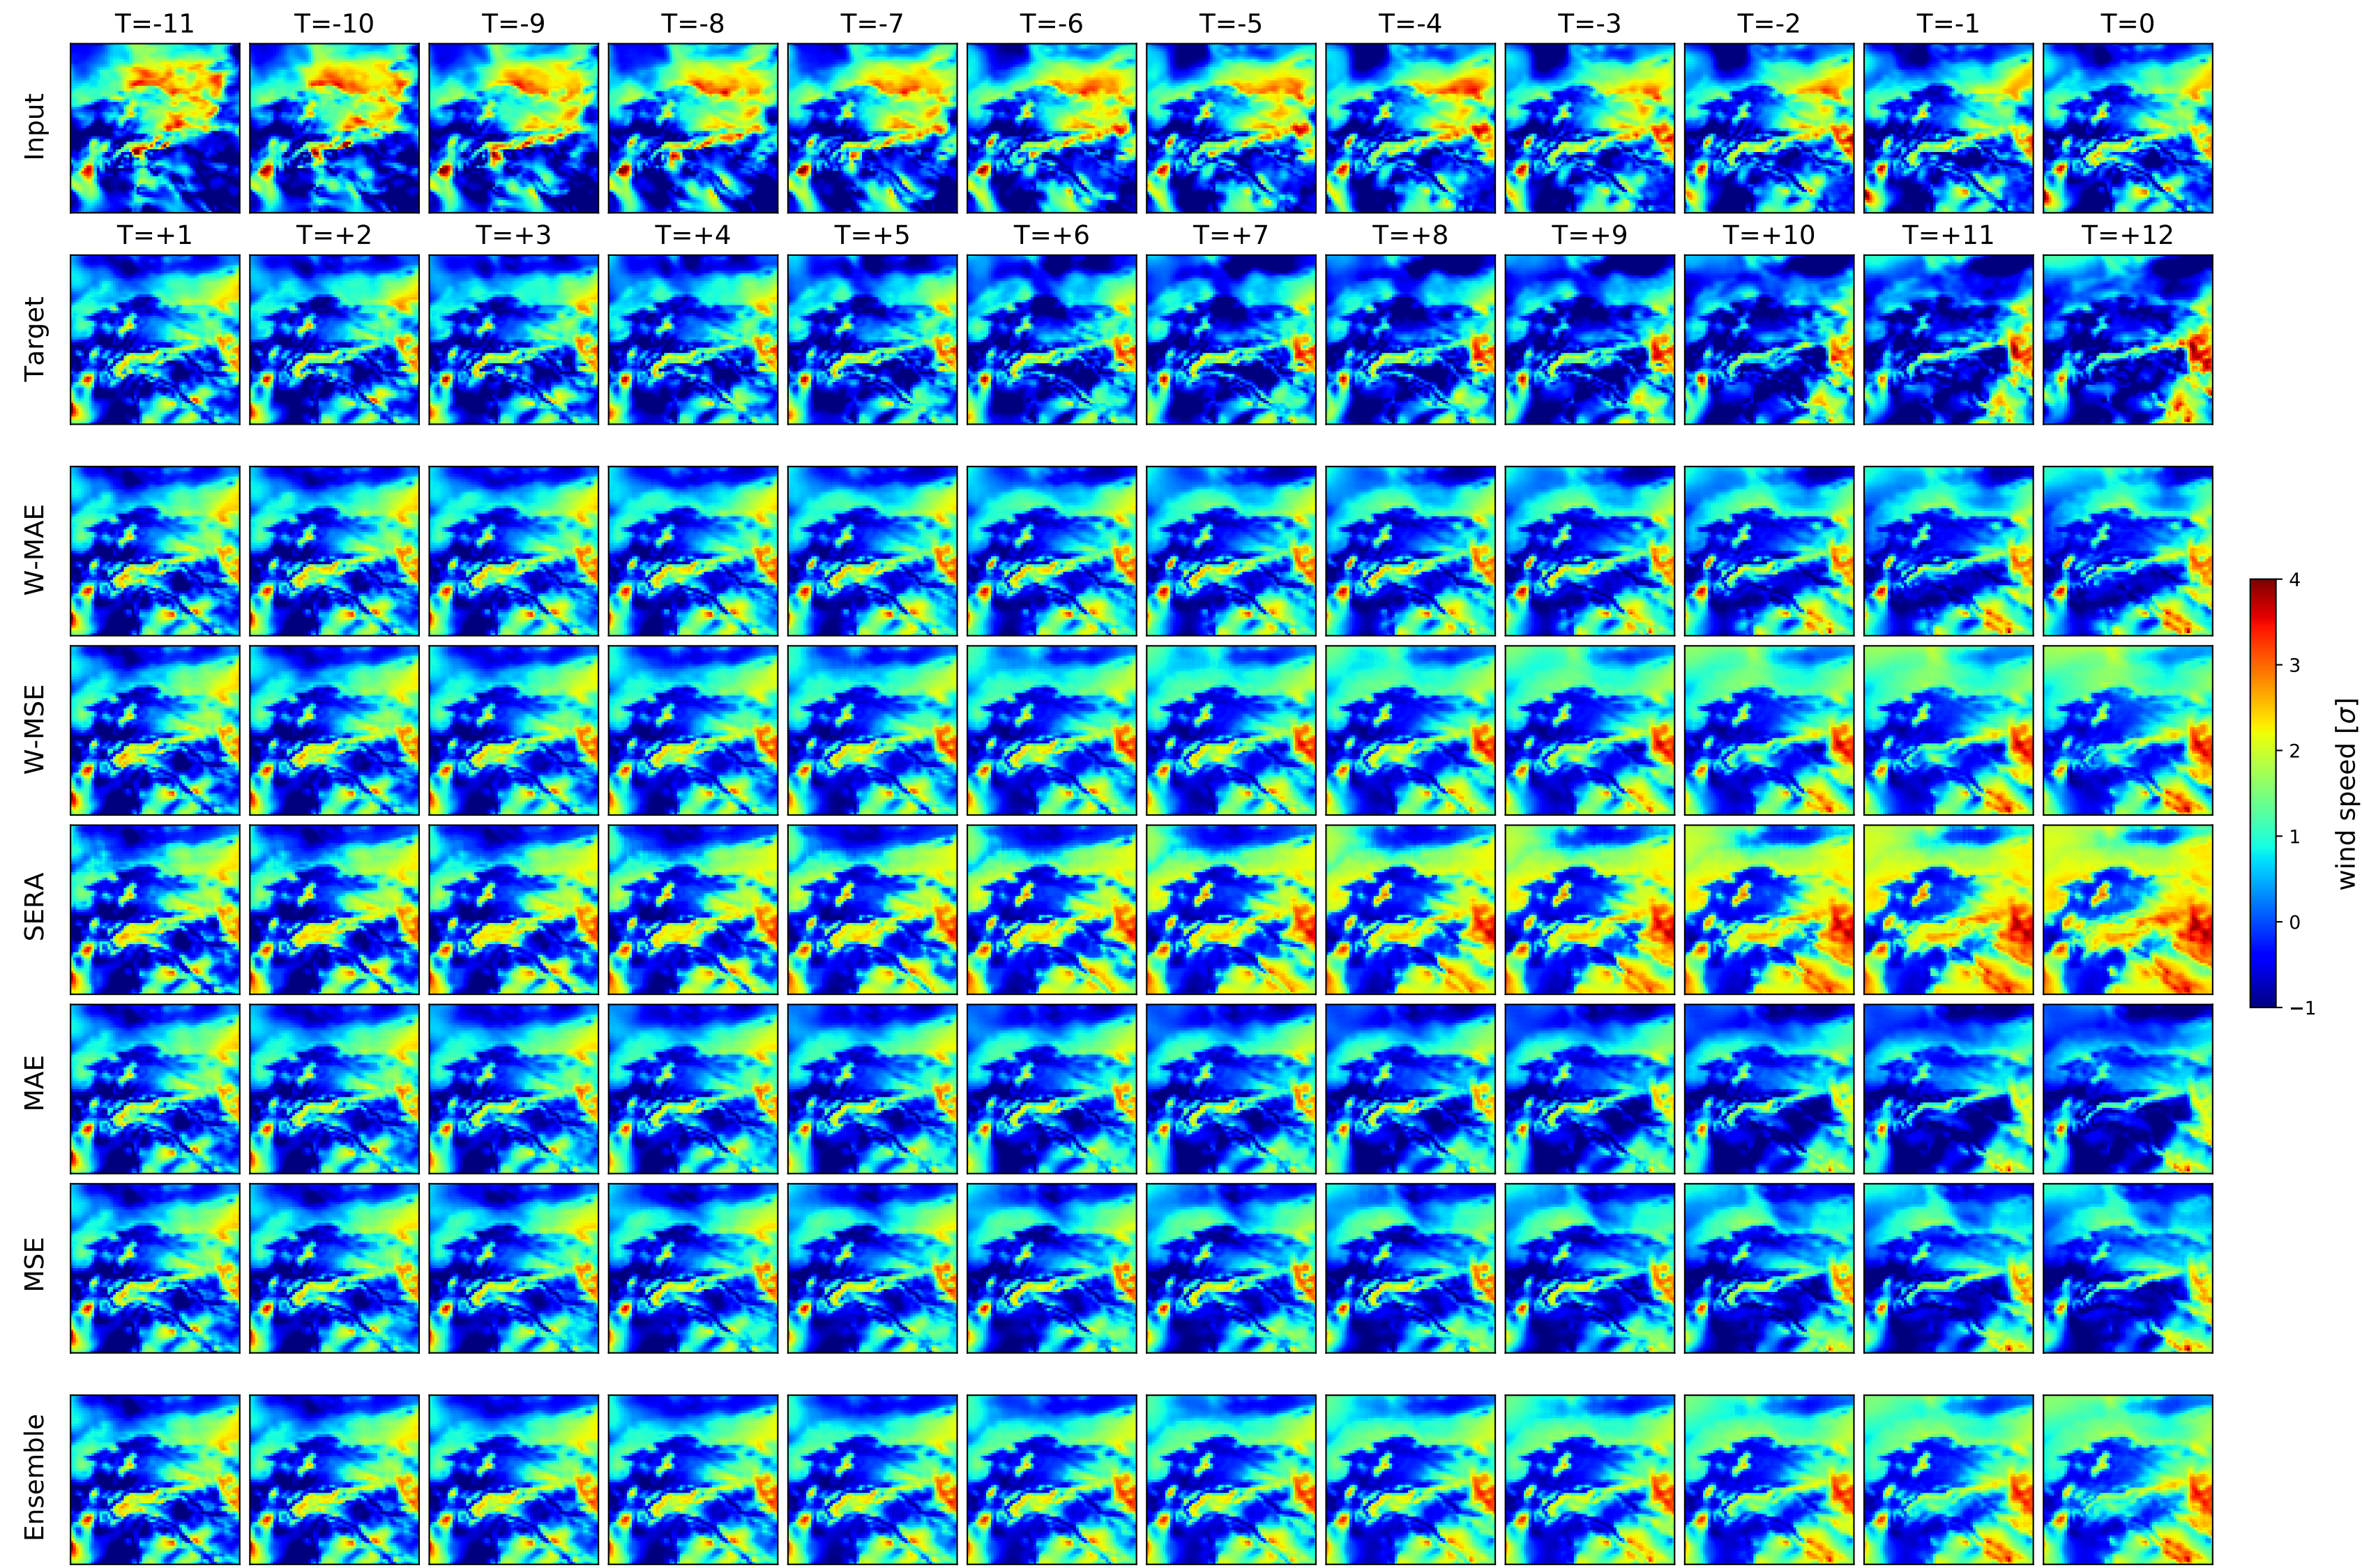

Supplement: Supplementary file 11 [file example_17.pdf › example_forecasts/example_17.pdf]

2019-01-03 00:00

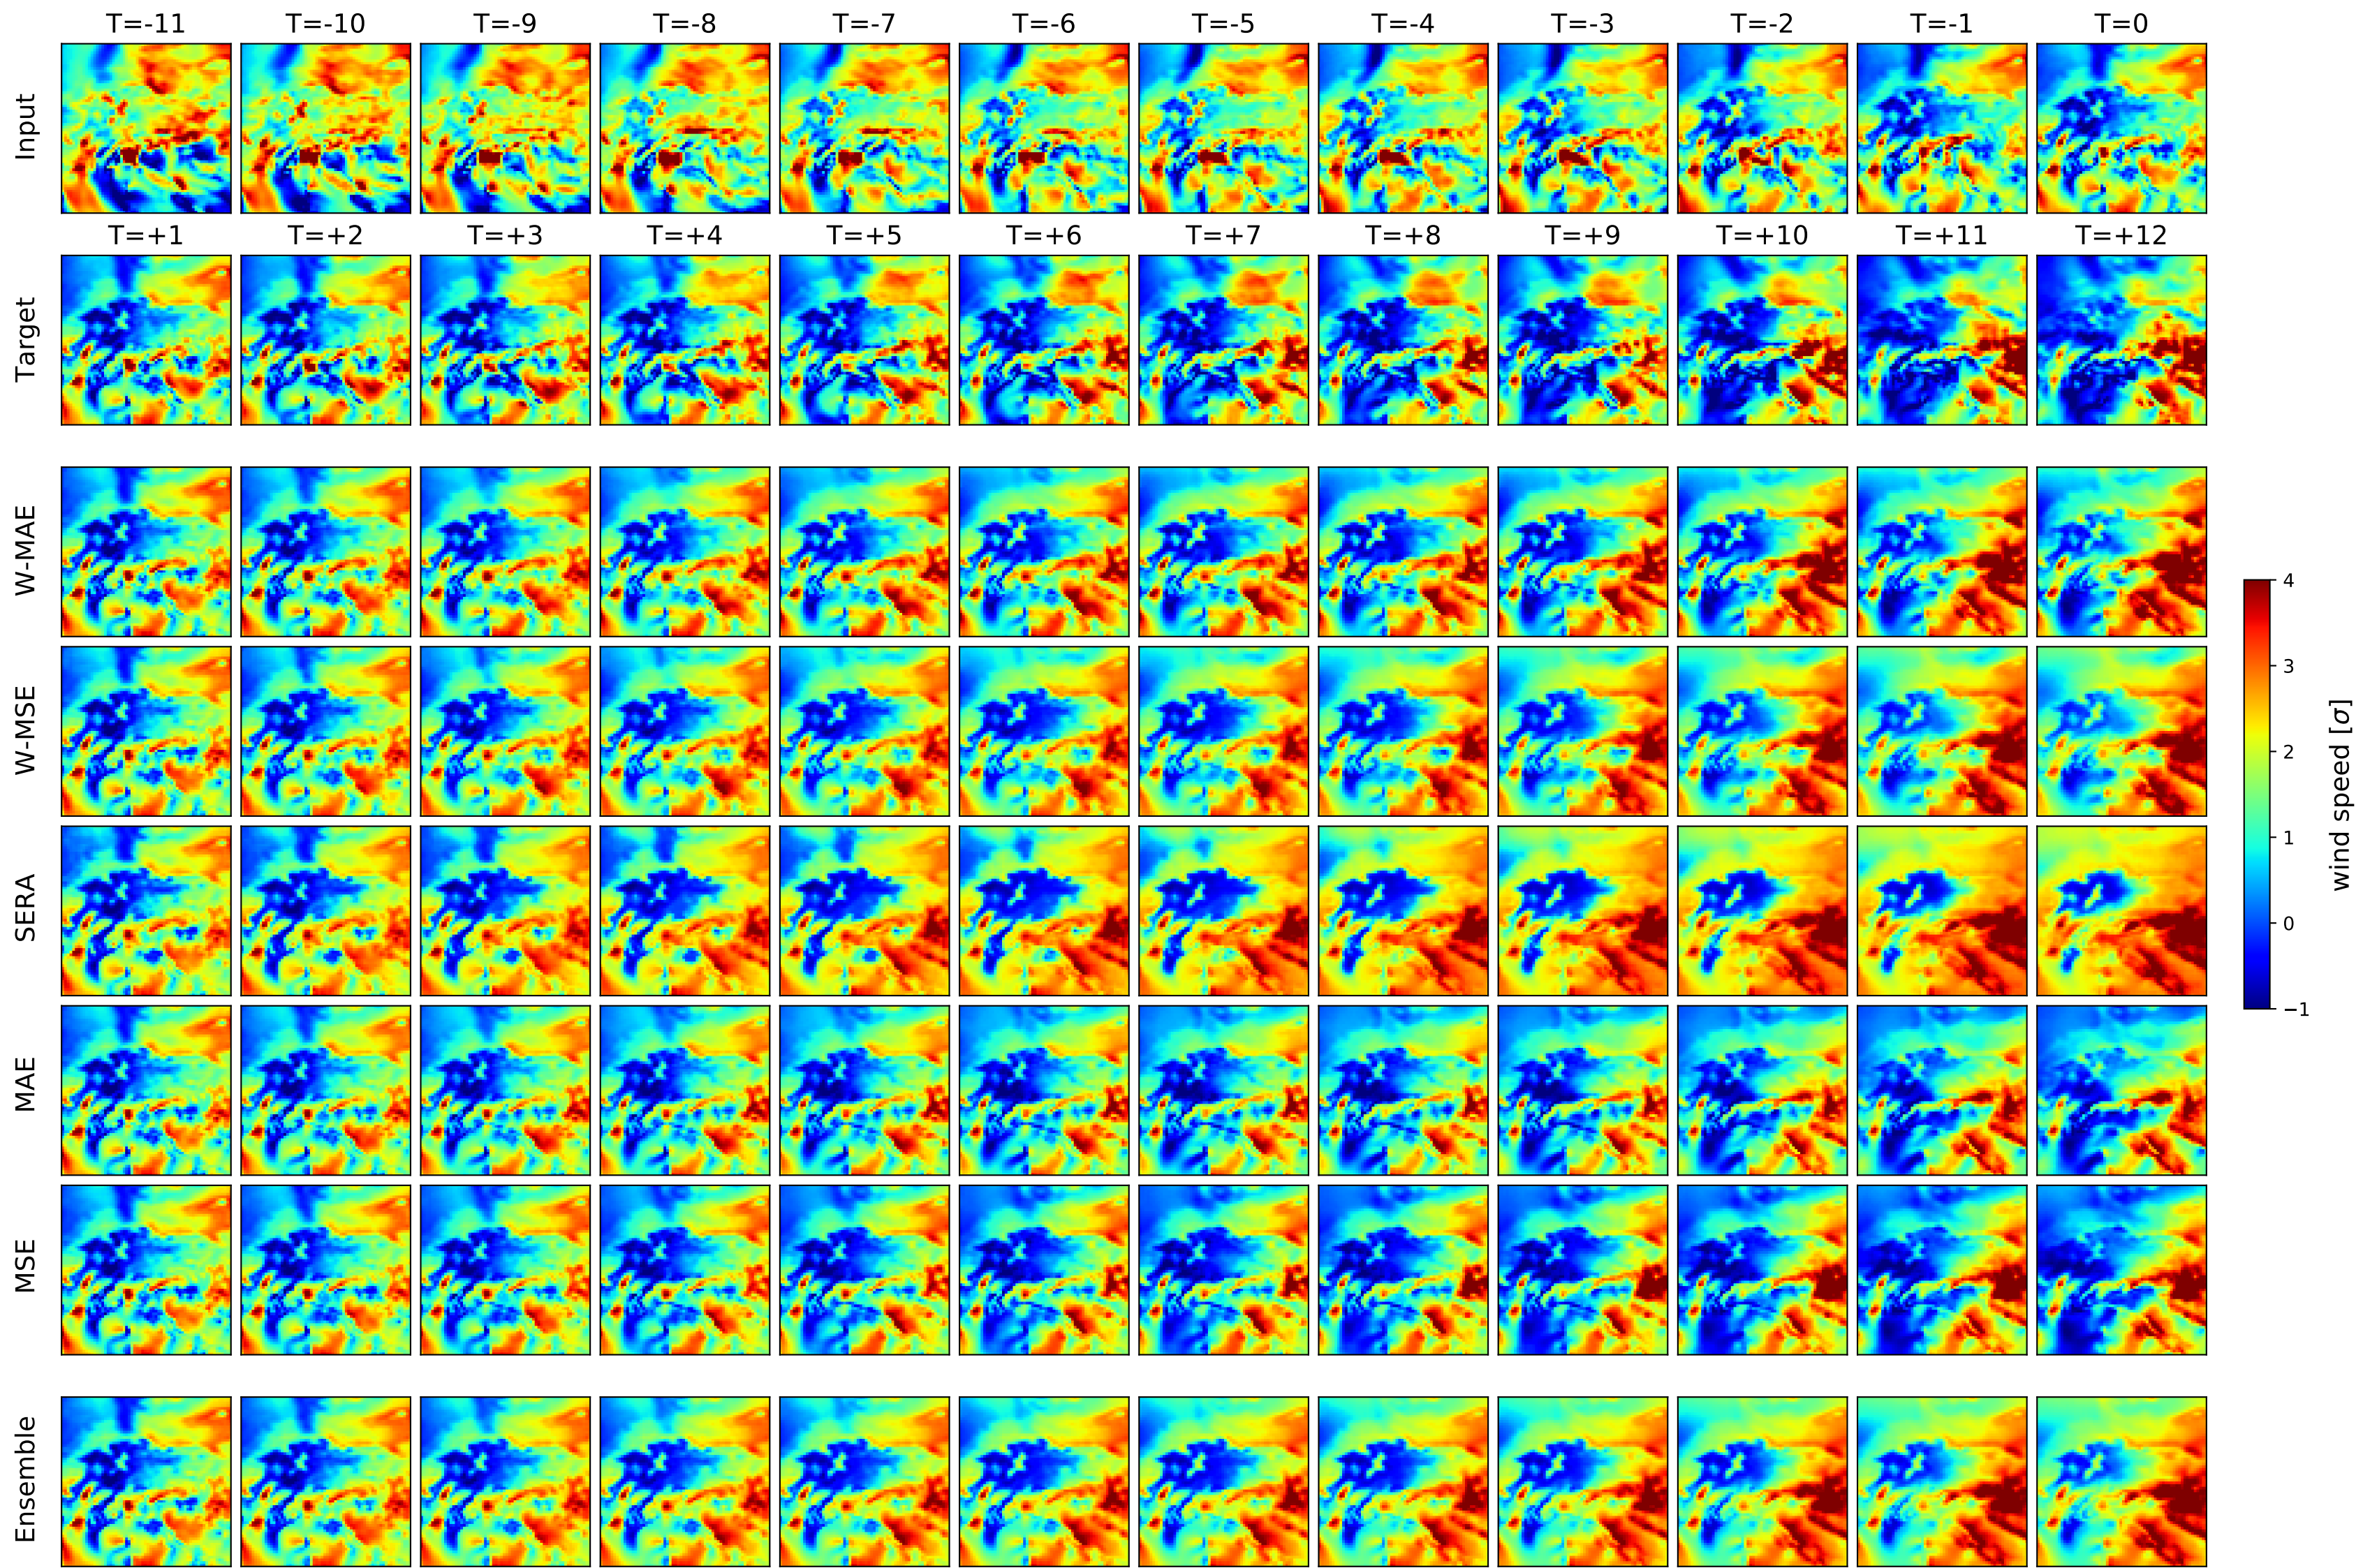

Supplement: Supplementary file 12 [file example_23.pdf › example_forecasts/example_23.pdf]

2019-06-08 00:00

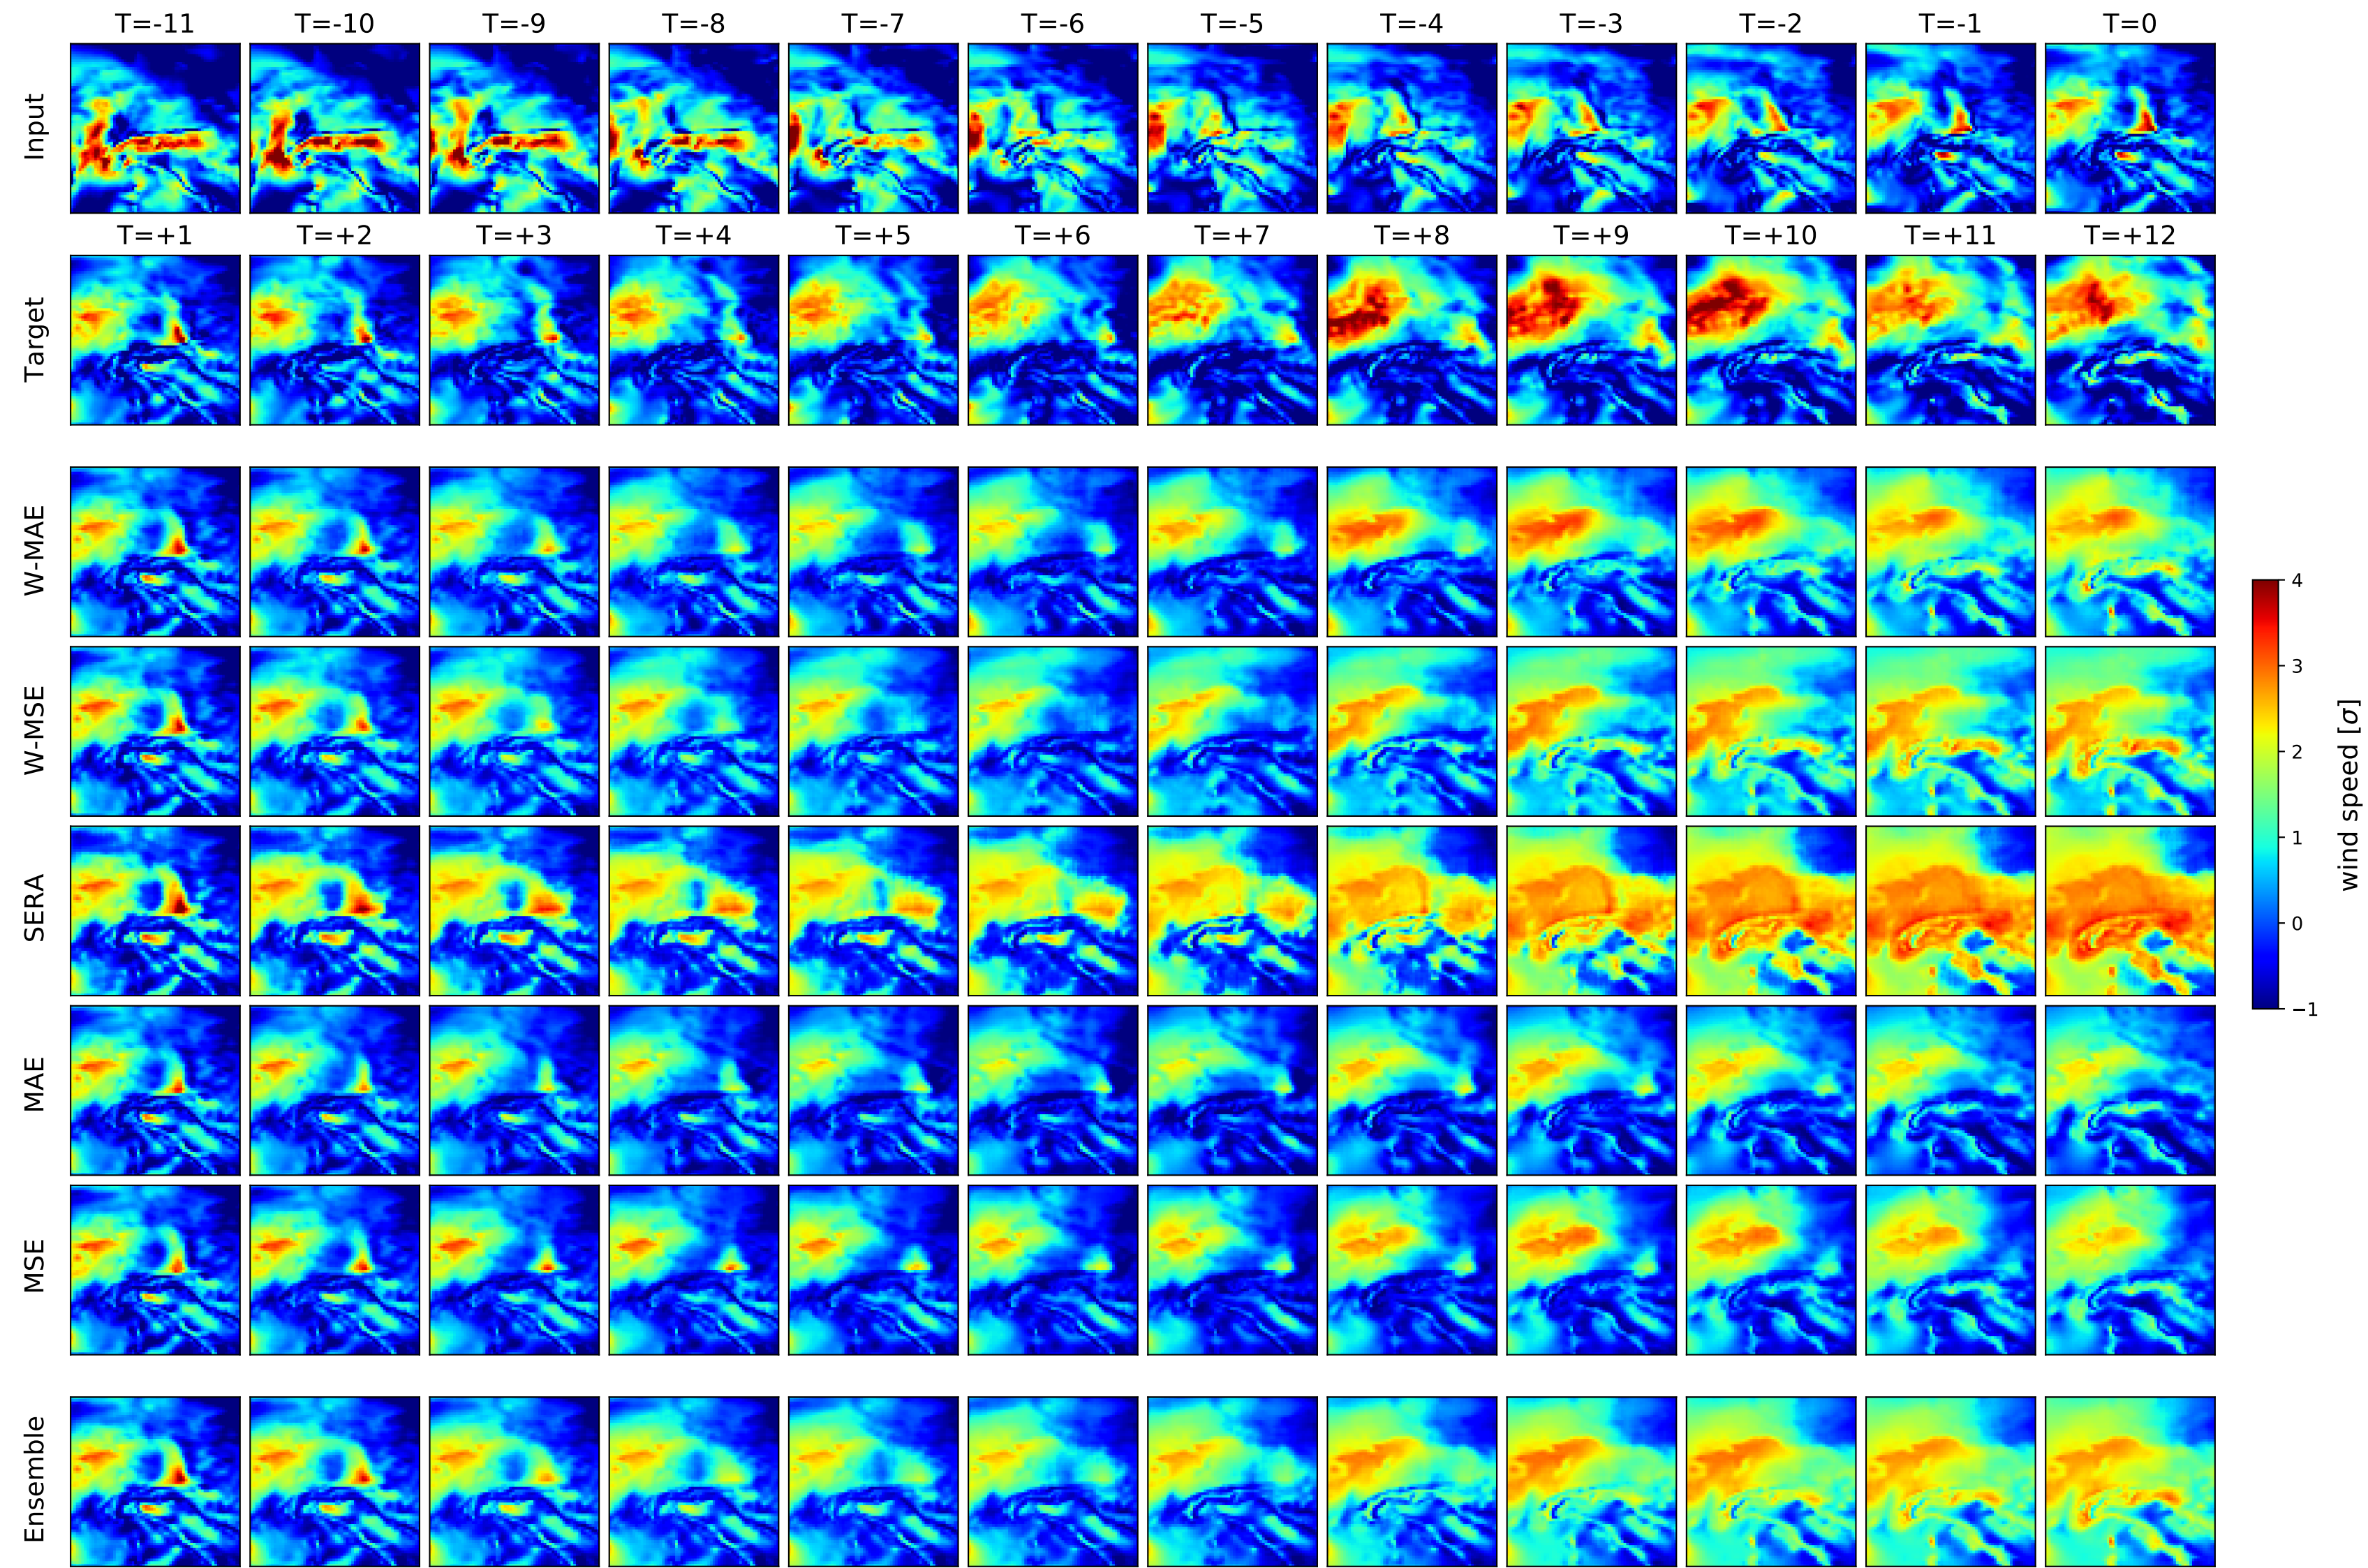

Supplement: Supplementary file 13 [file example_335.pdf › example_forecasts/example_335.pdf]

2019-01-08 12:00

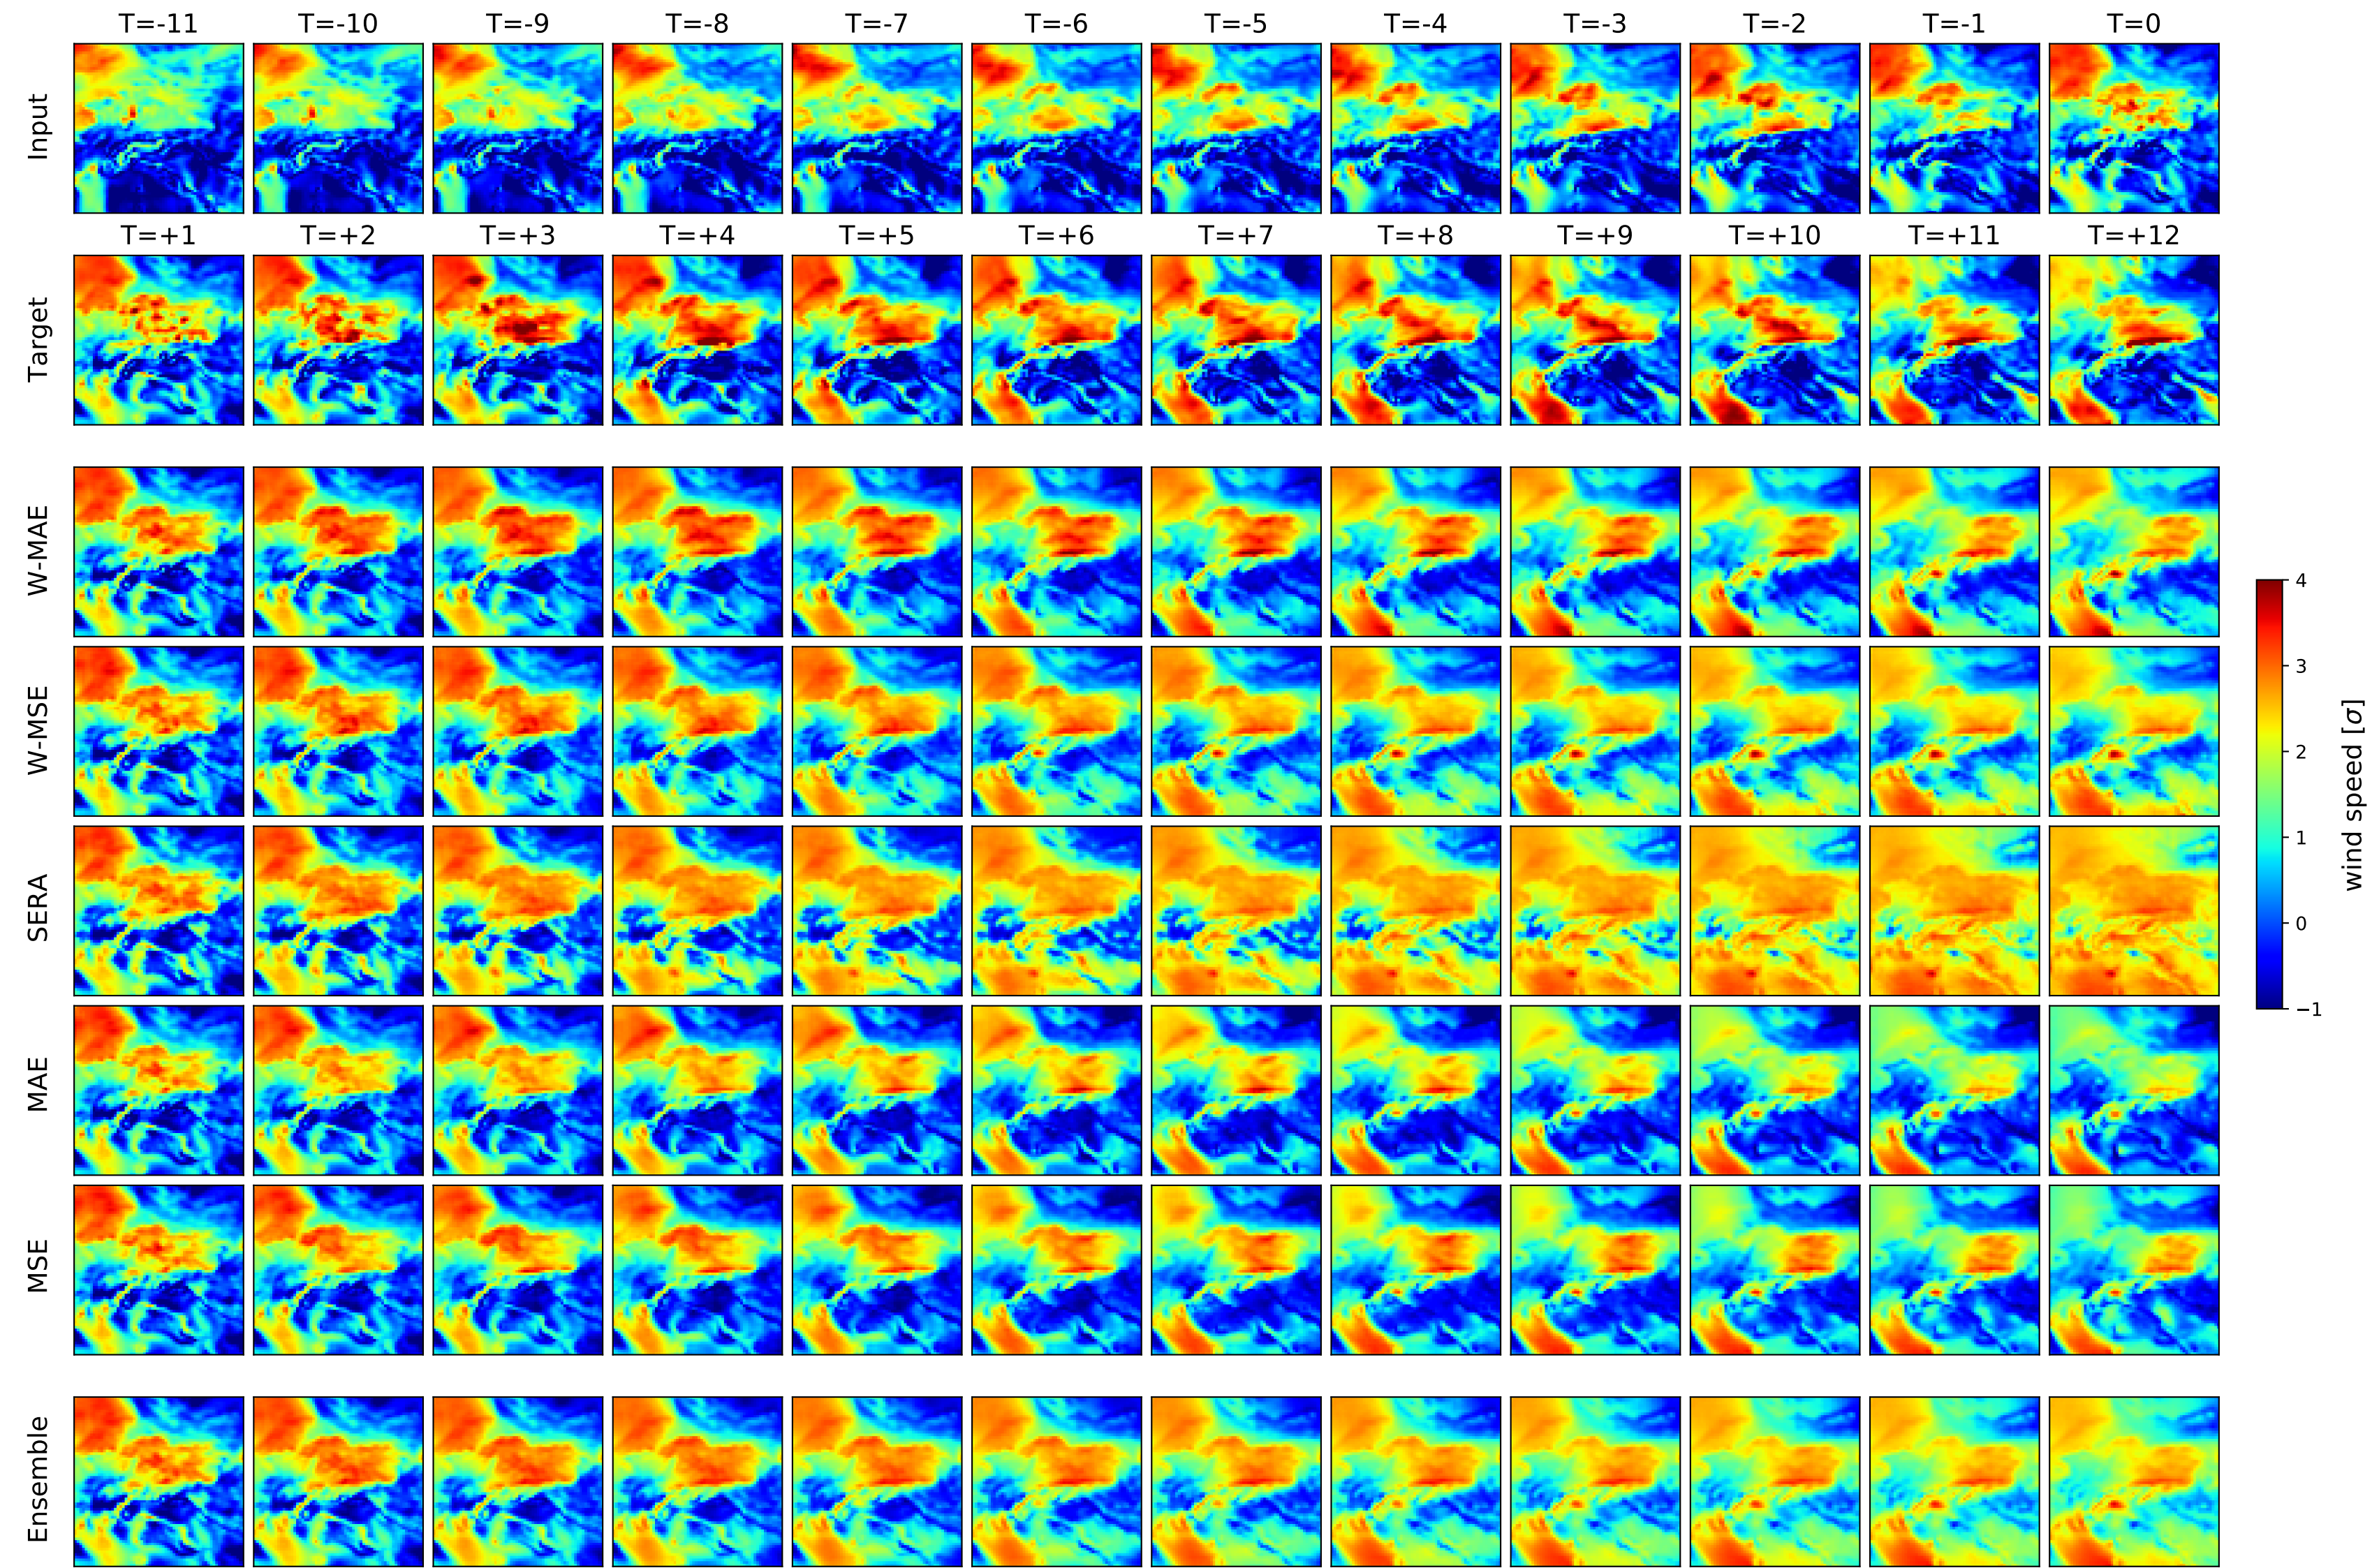

Supplement: Supplementary file 14 [file example_34.pdf › example_forecasts/example_34.pdf]

2019-01-10 12:00

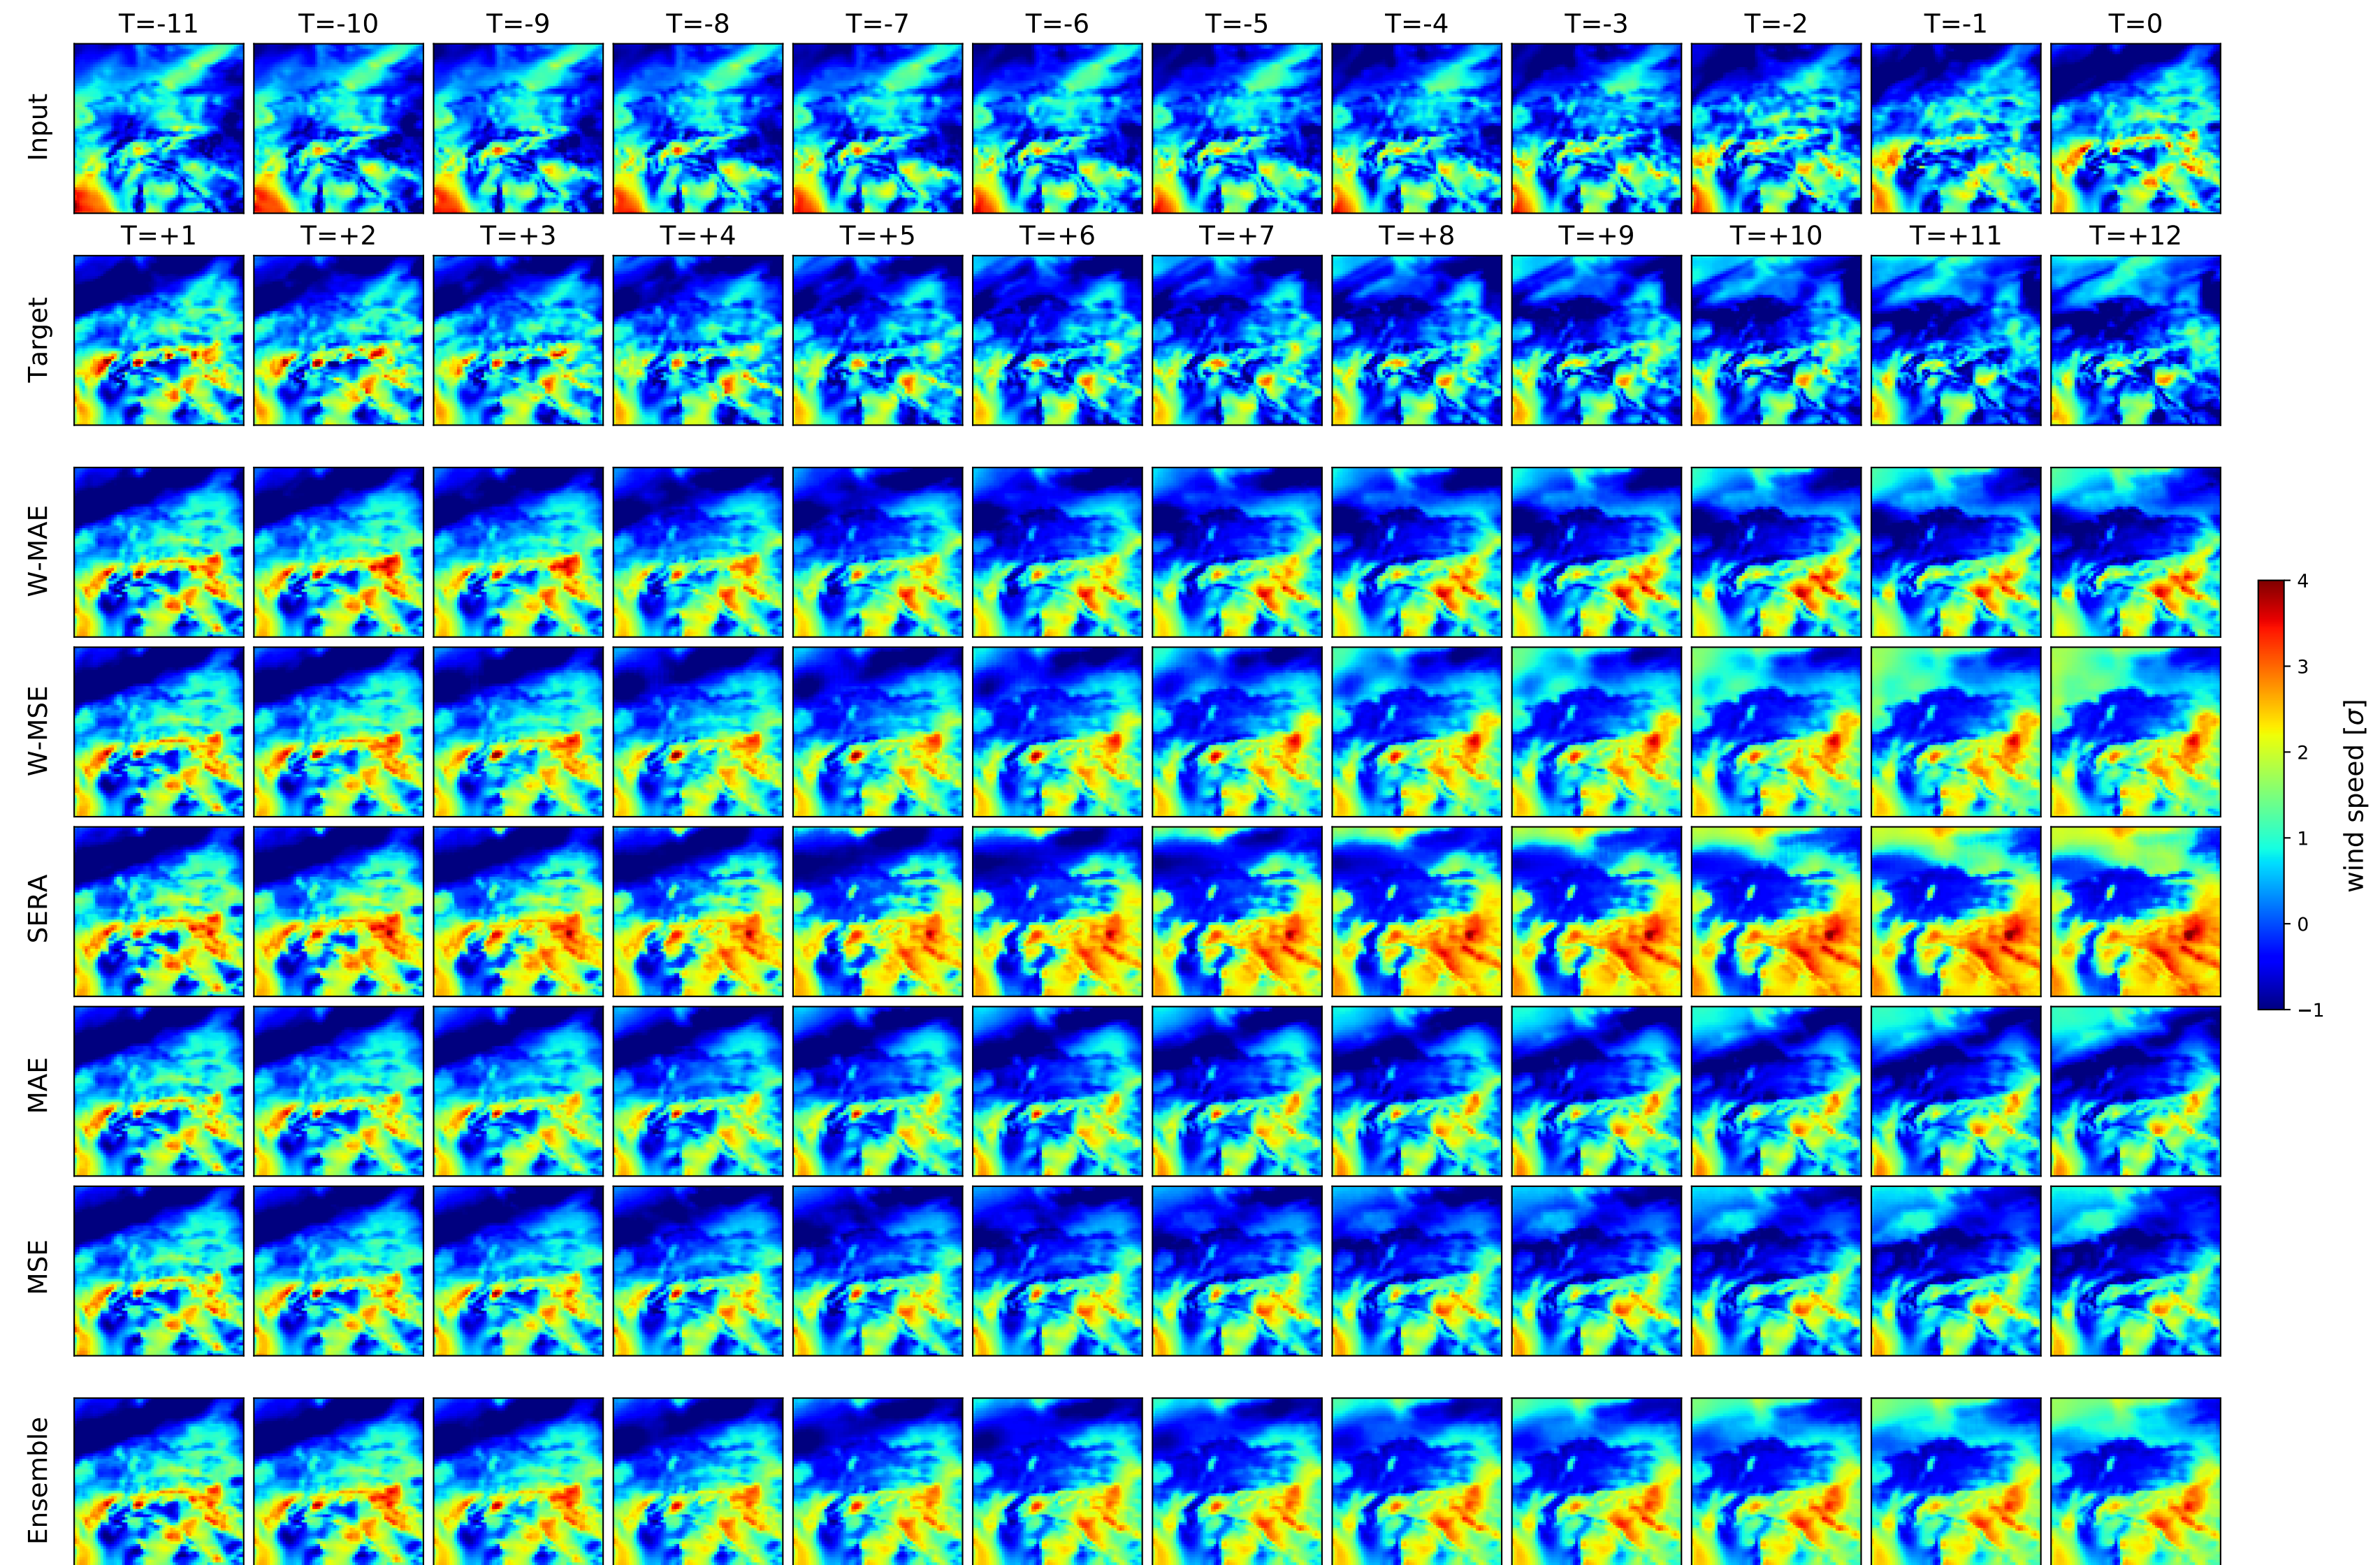

Supplement: Supplementary file 15 [file example_38.pdf › example_forecasts/example_38.pdf]

2019-07-09 00:00

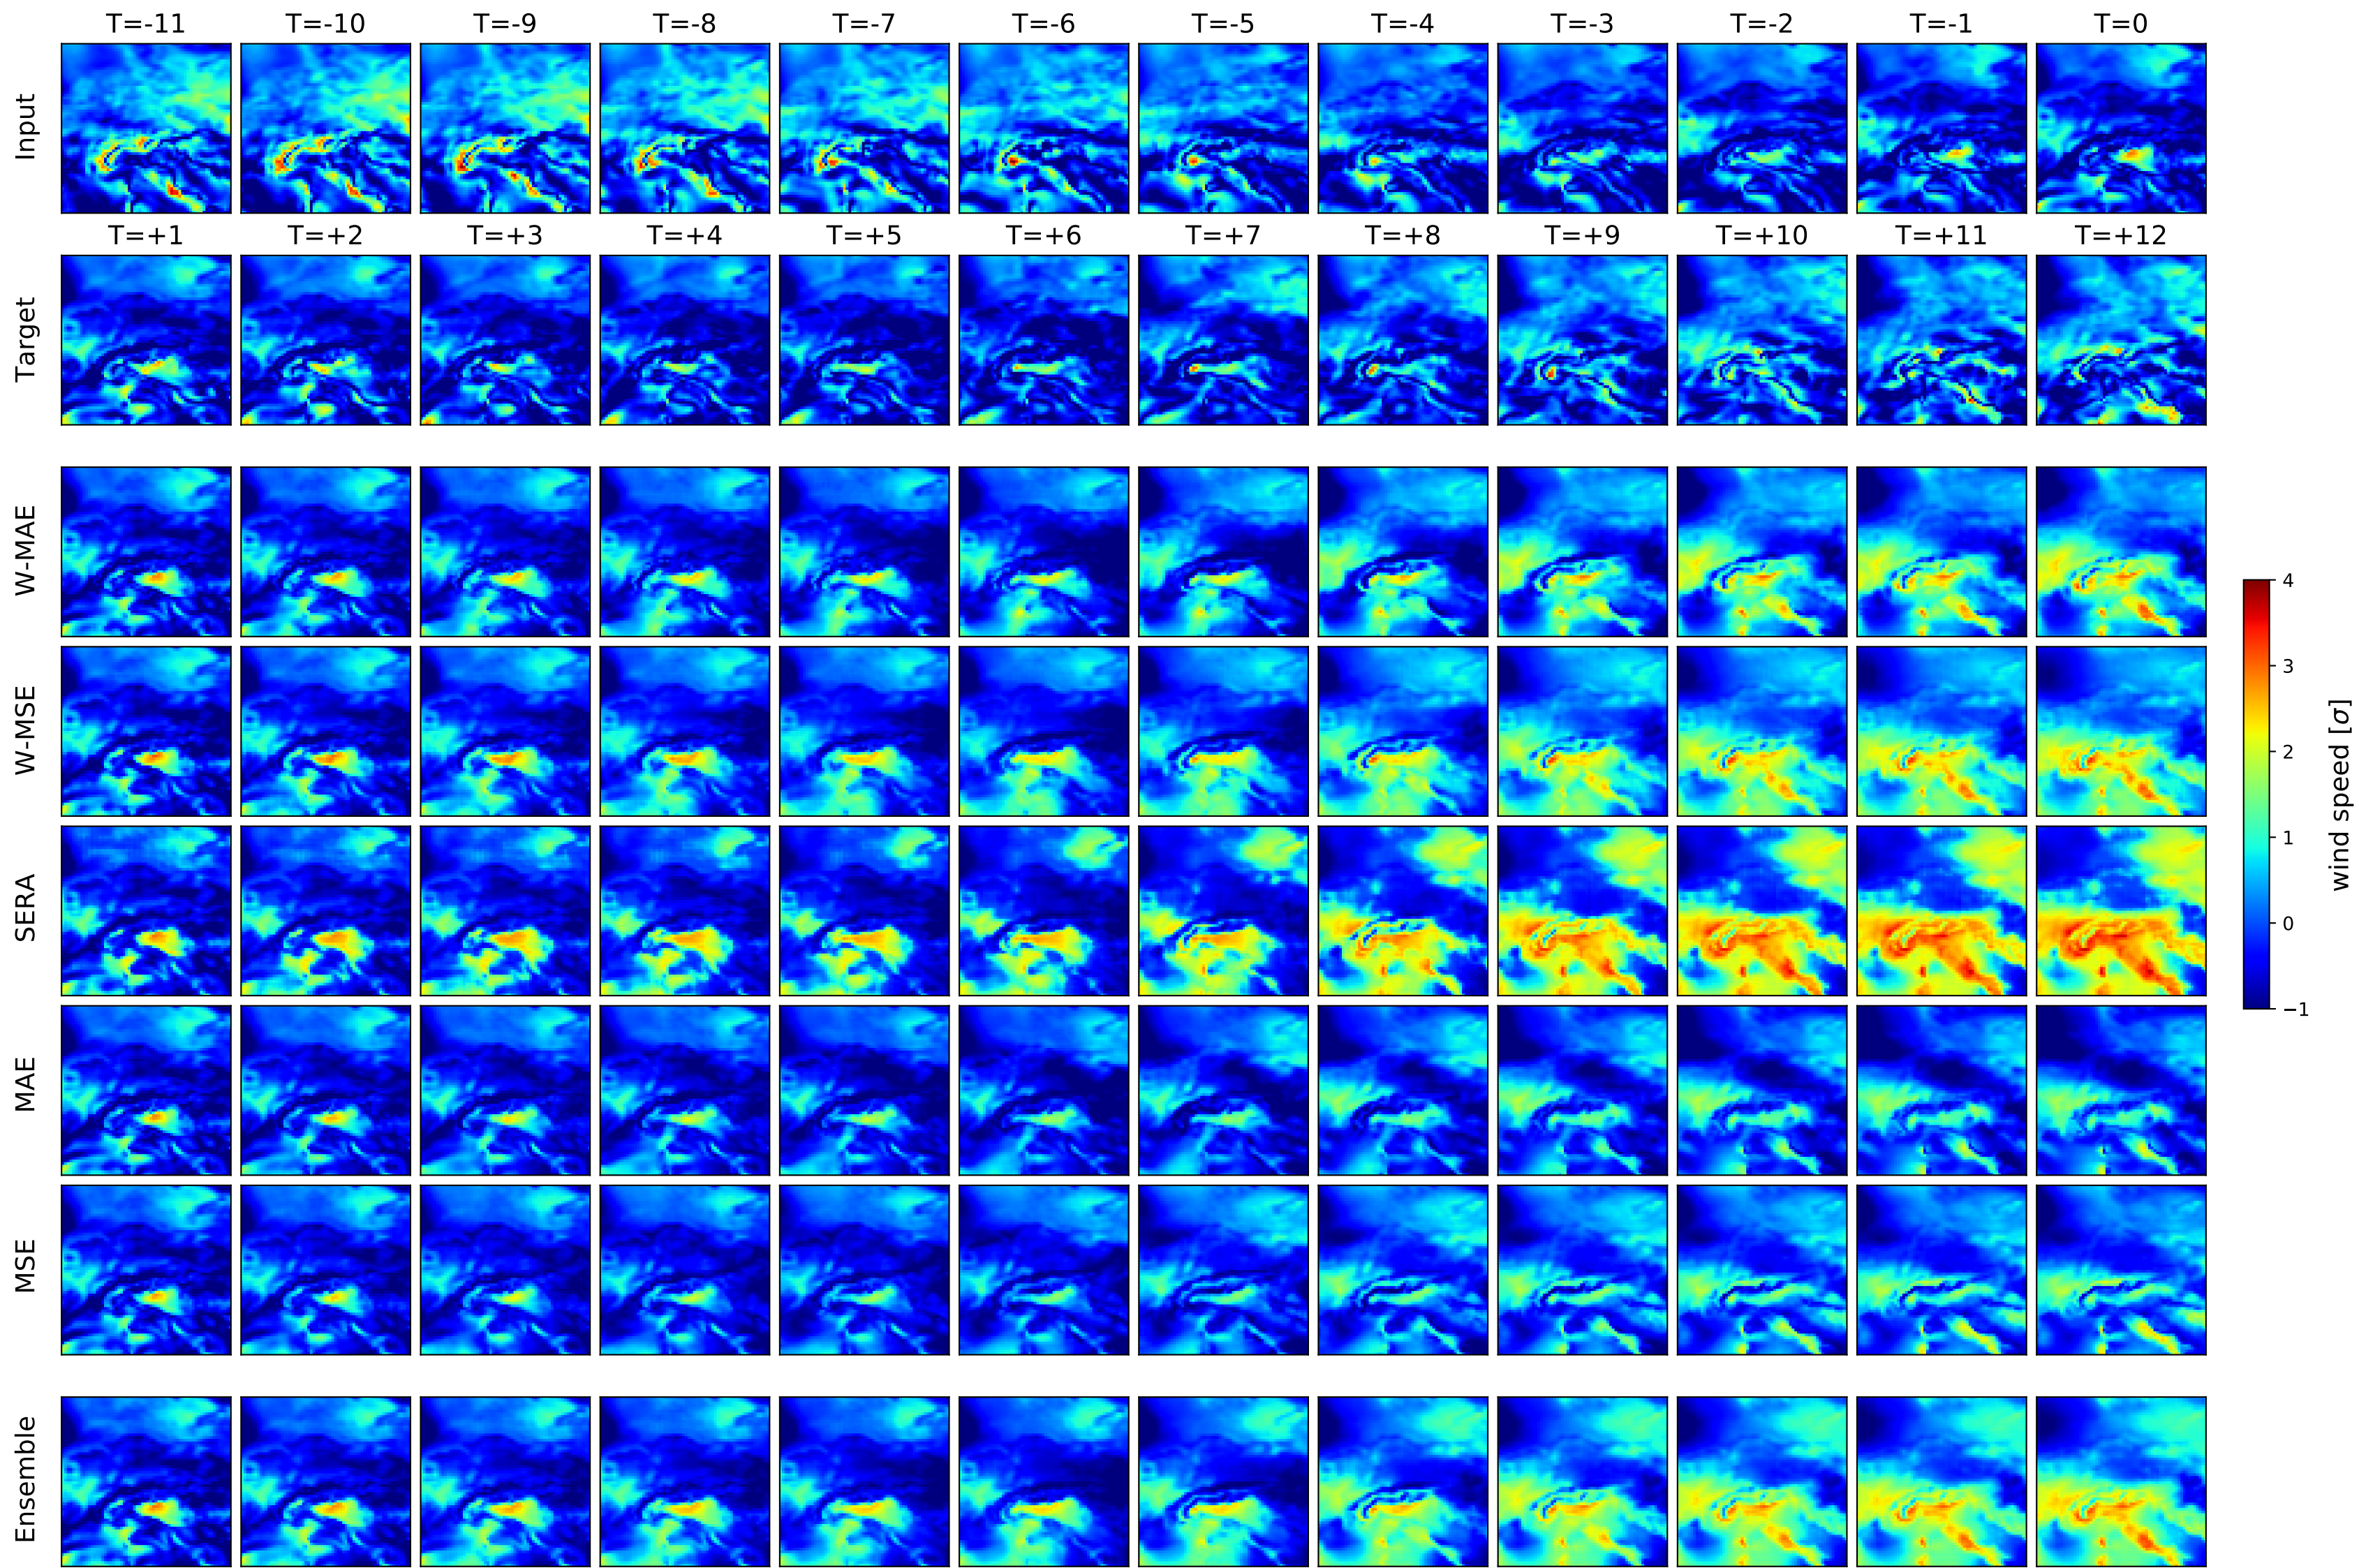

Supplement: Supplementary file 16 [file example_397.pdf › example_forecasts/example_397.pdf]

2019-01-14 00:00

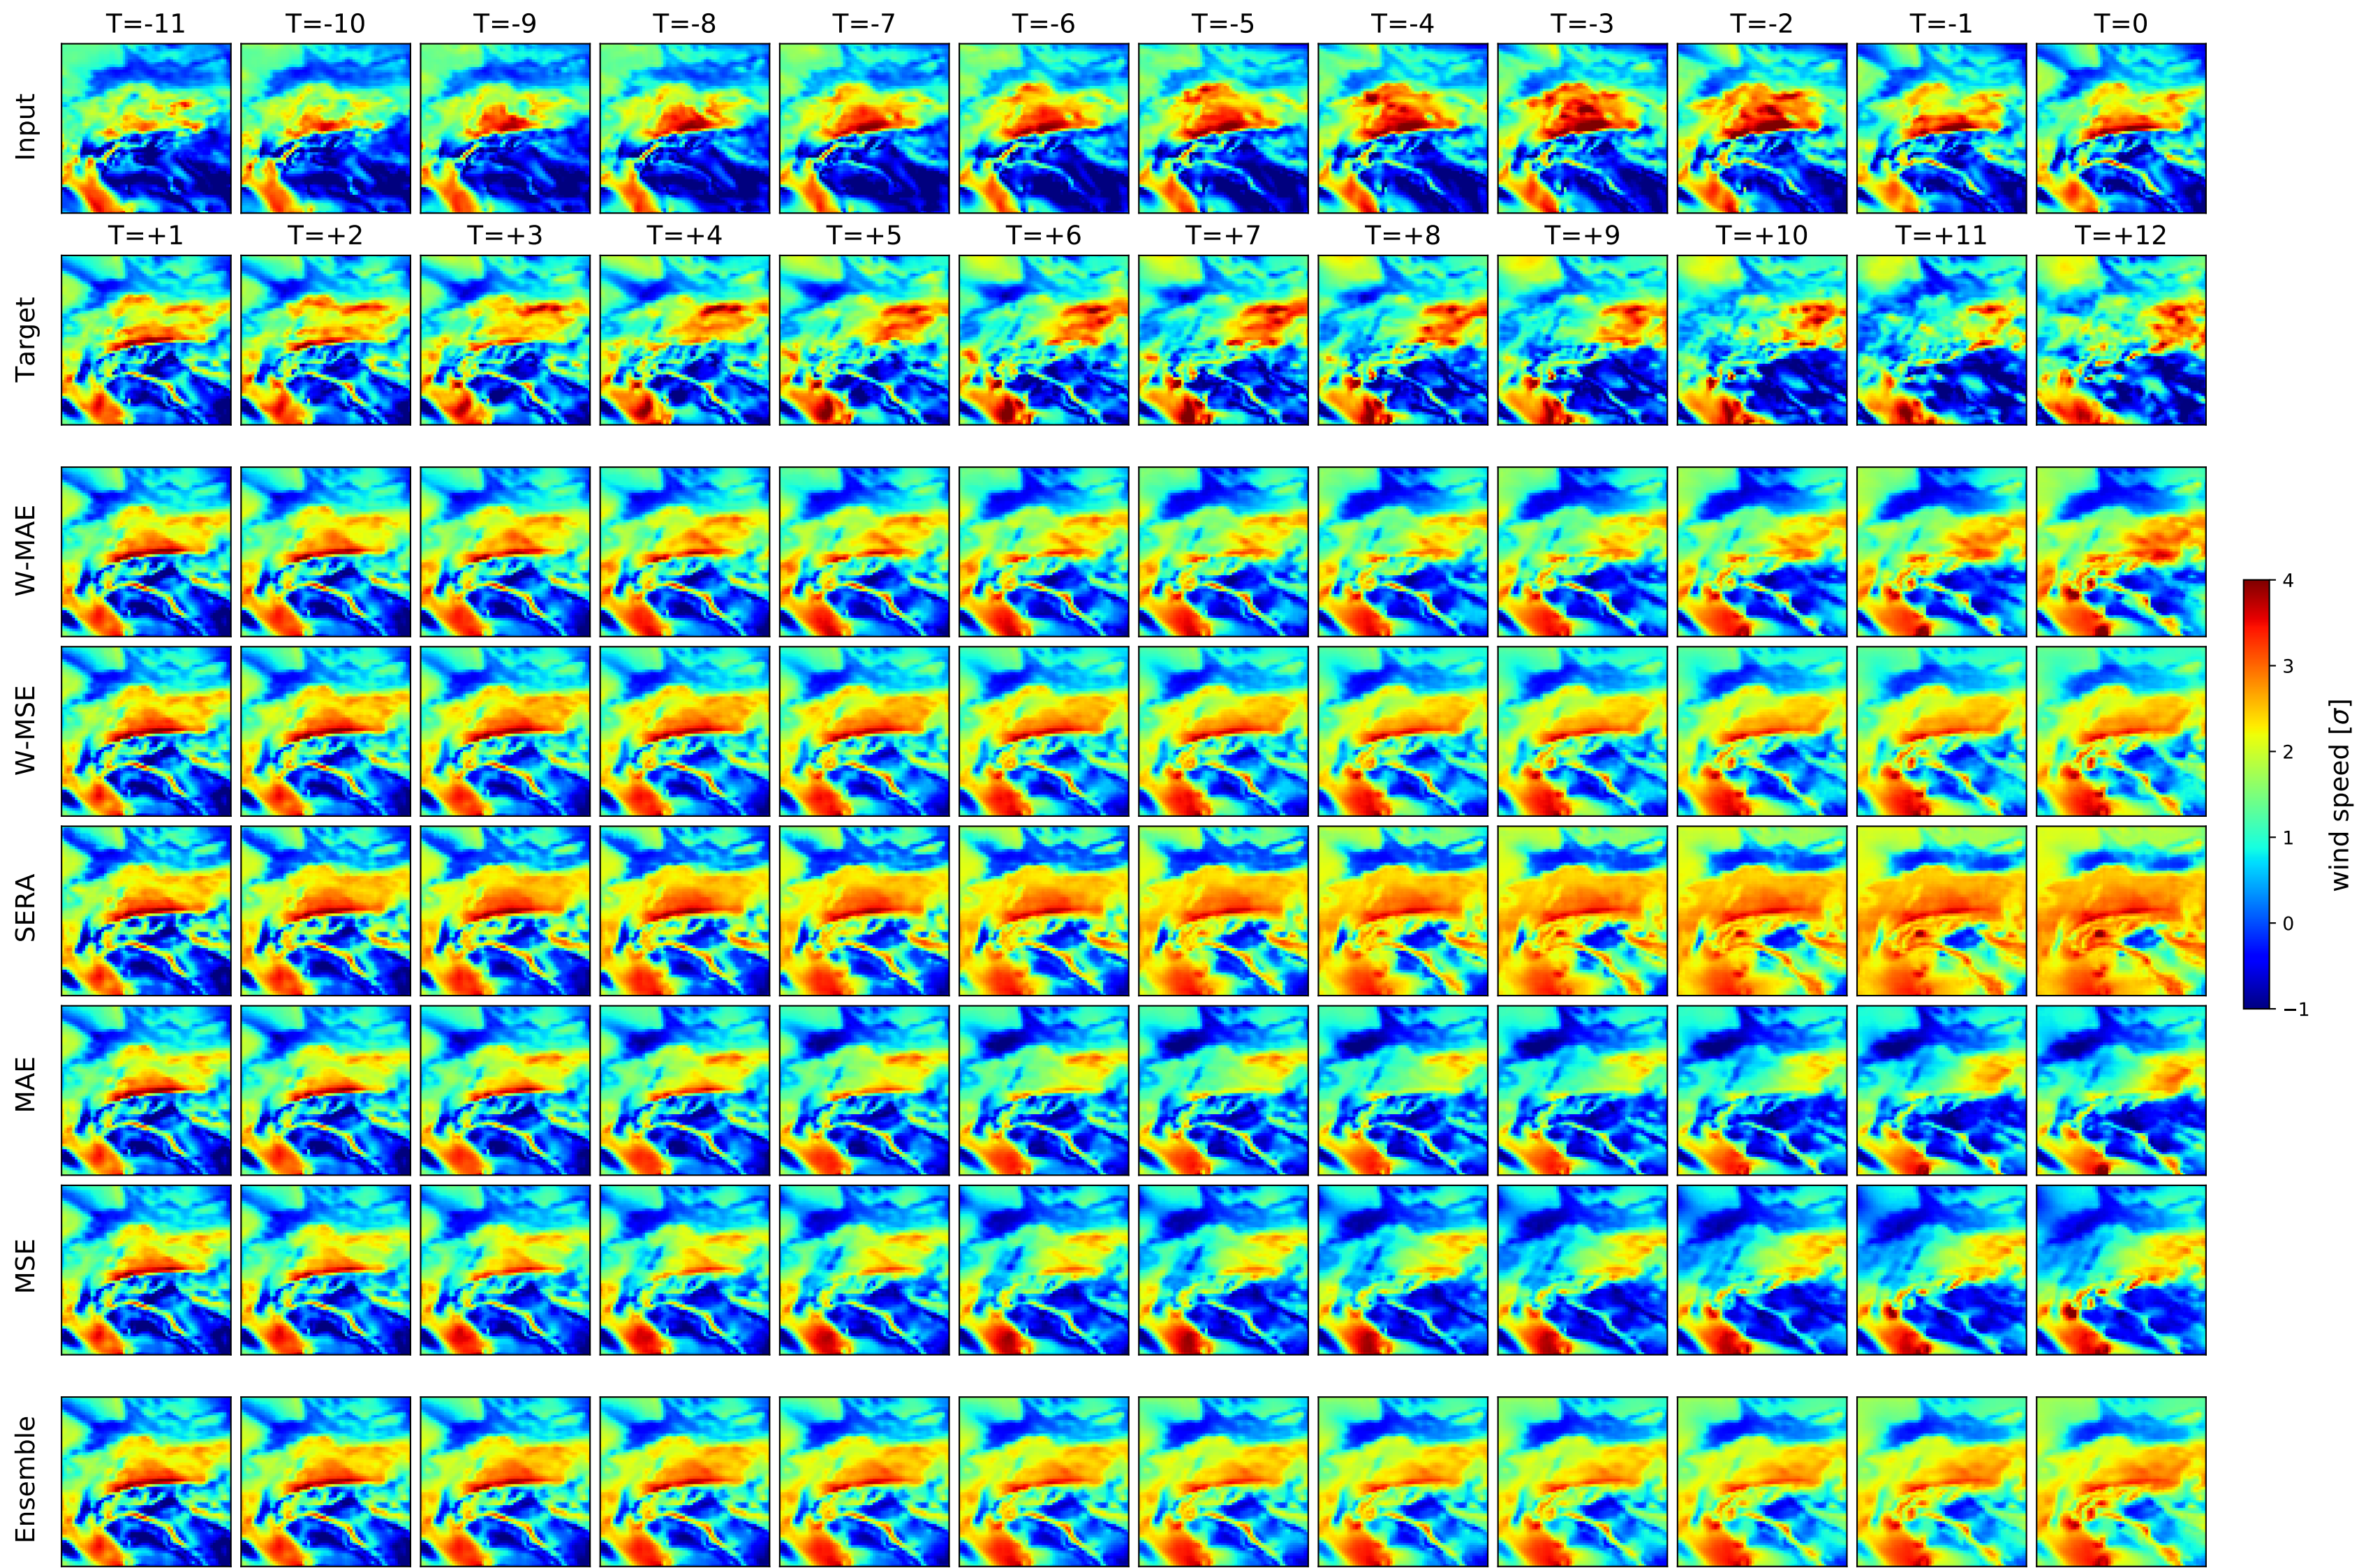

Supplement: Supplementary file 17 [file example_45.pdf › example_forecasts/example_45.pdf]

2019-08-10 00:00

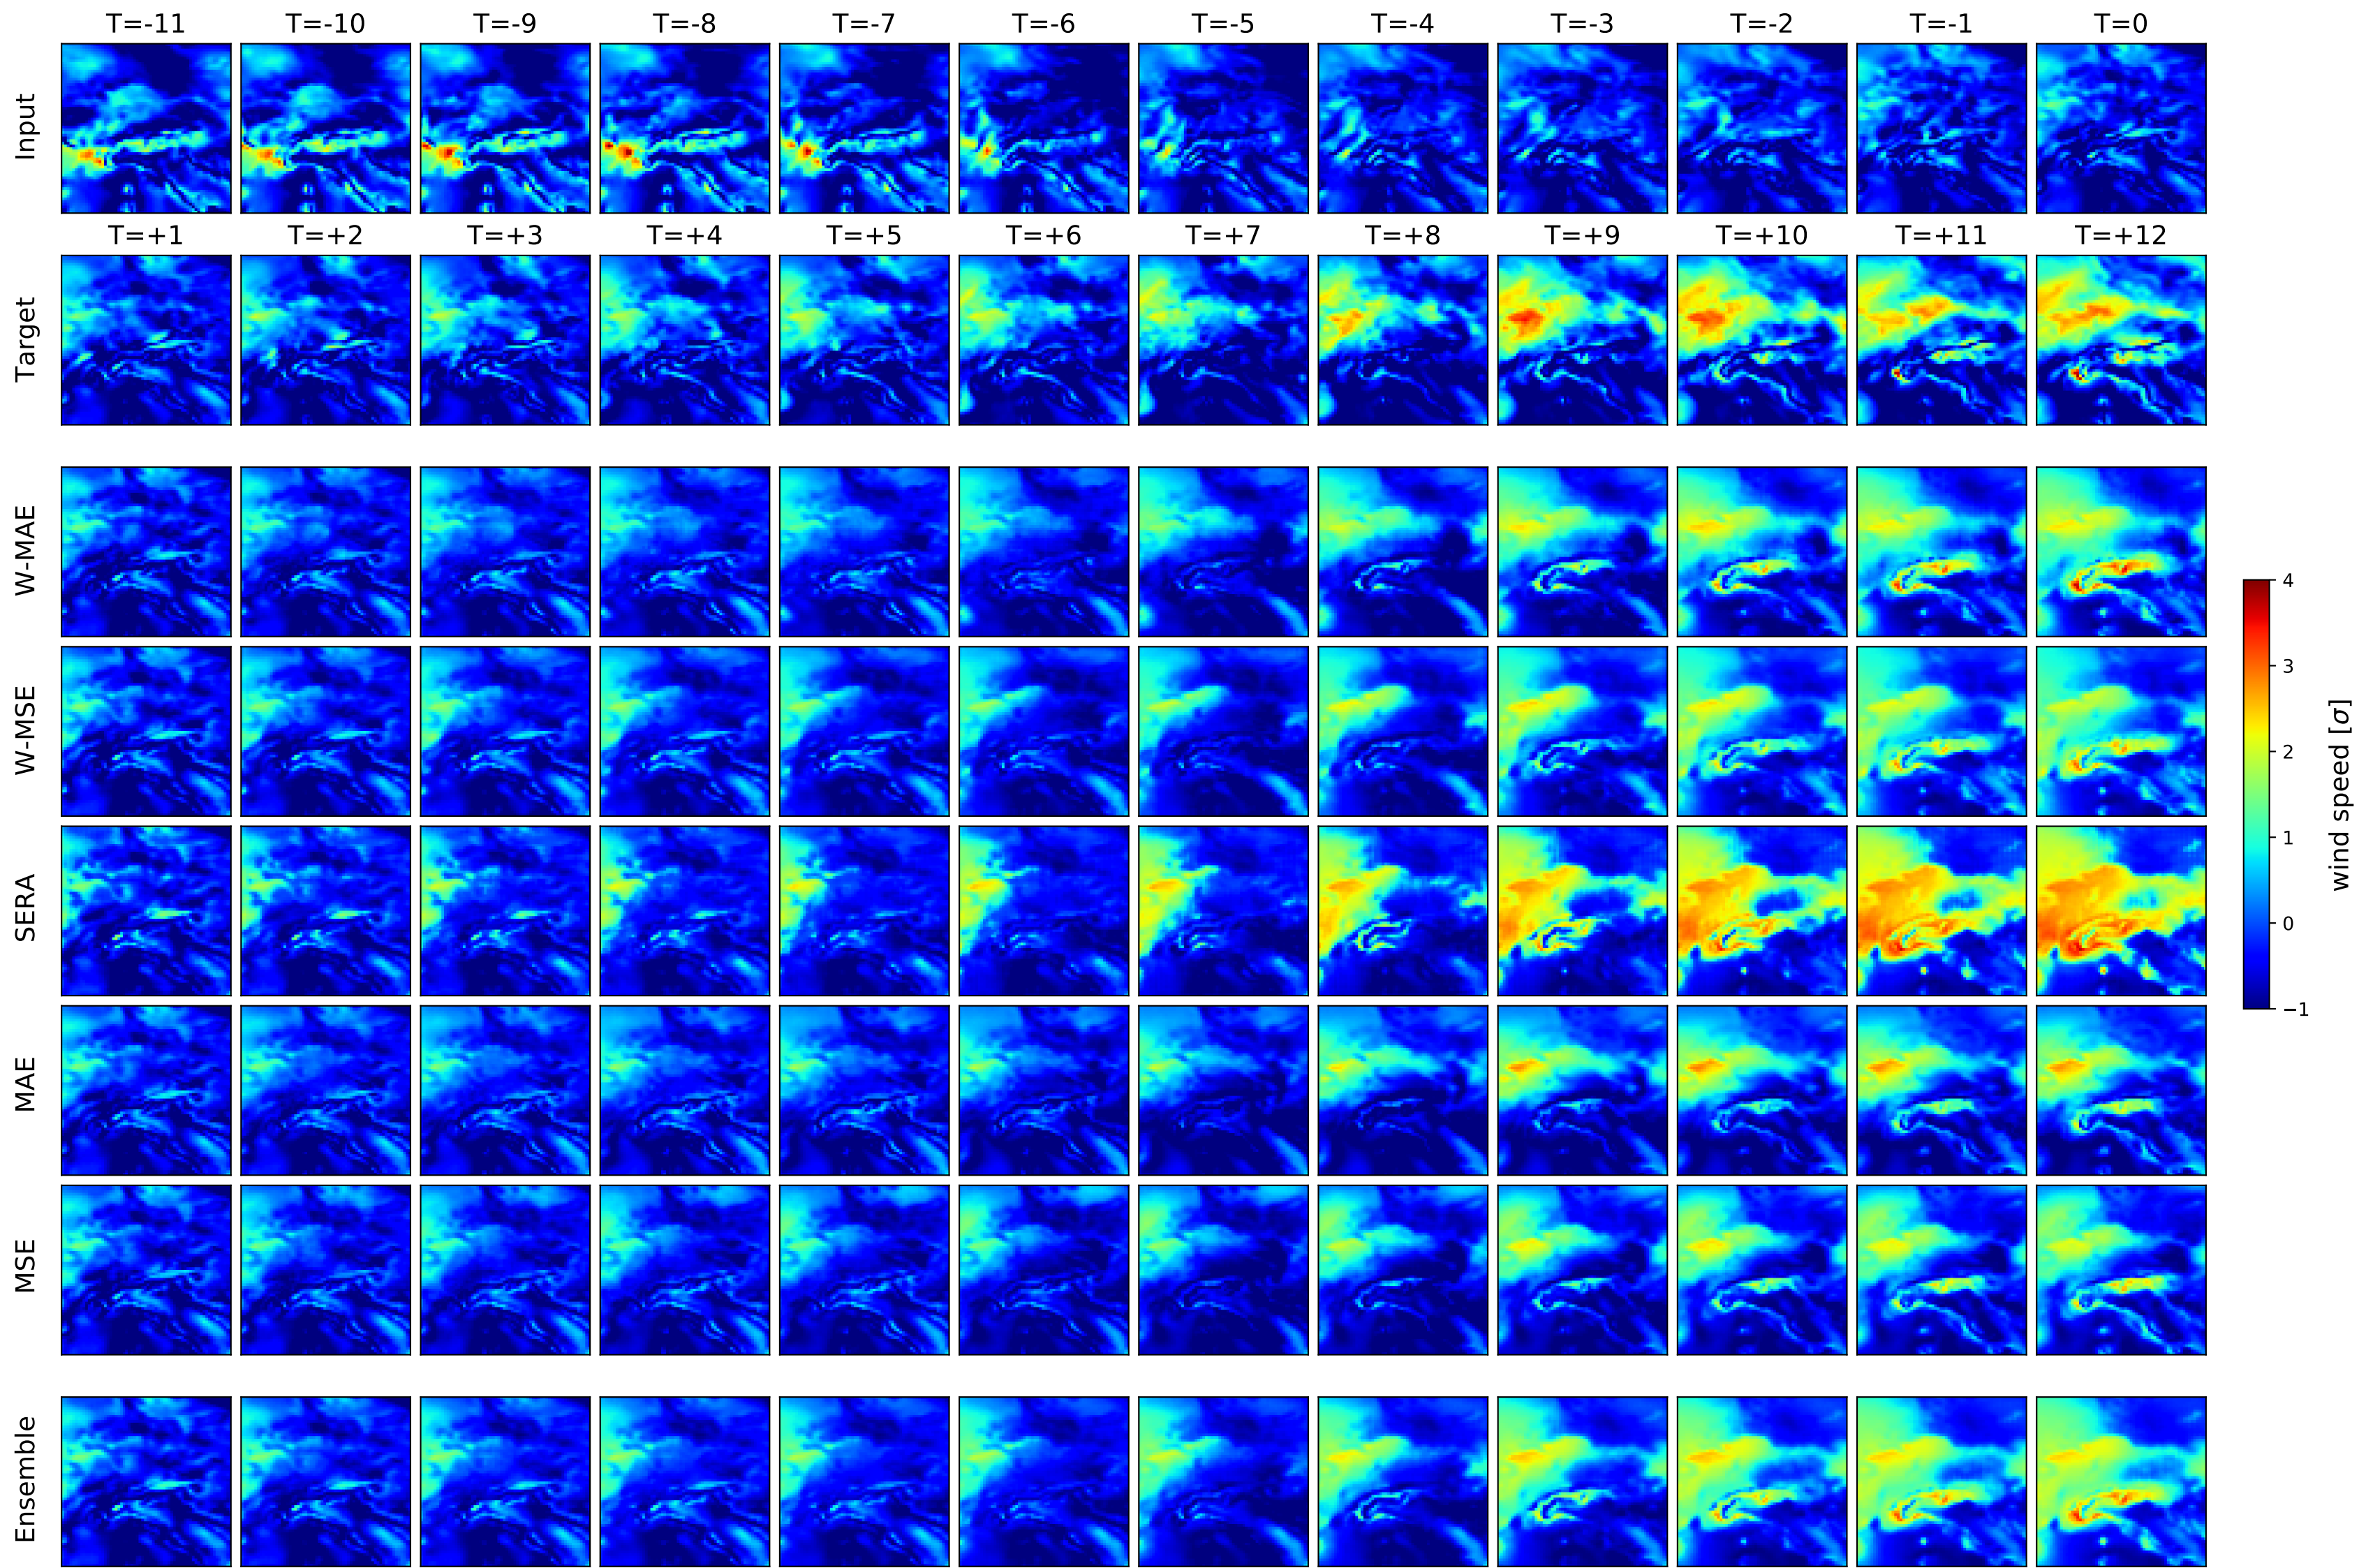

Supplement: Supplementary file 18 [file example_461.pdf › example_forecasts/example_461.pdf]

2019-08-21 00:00

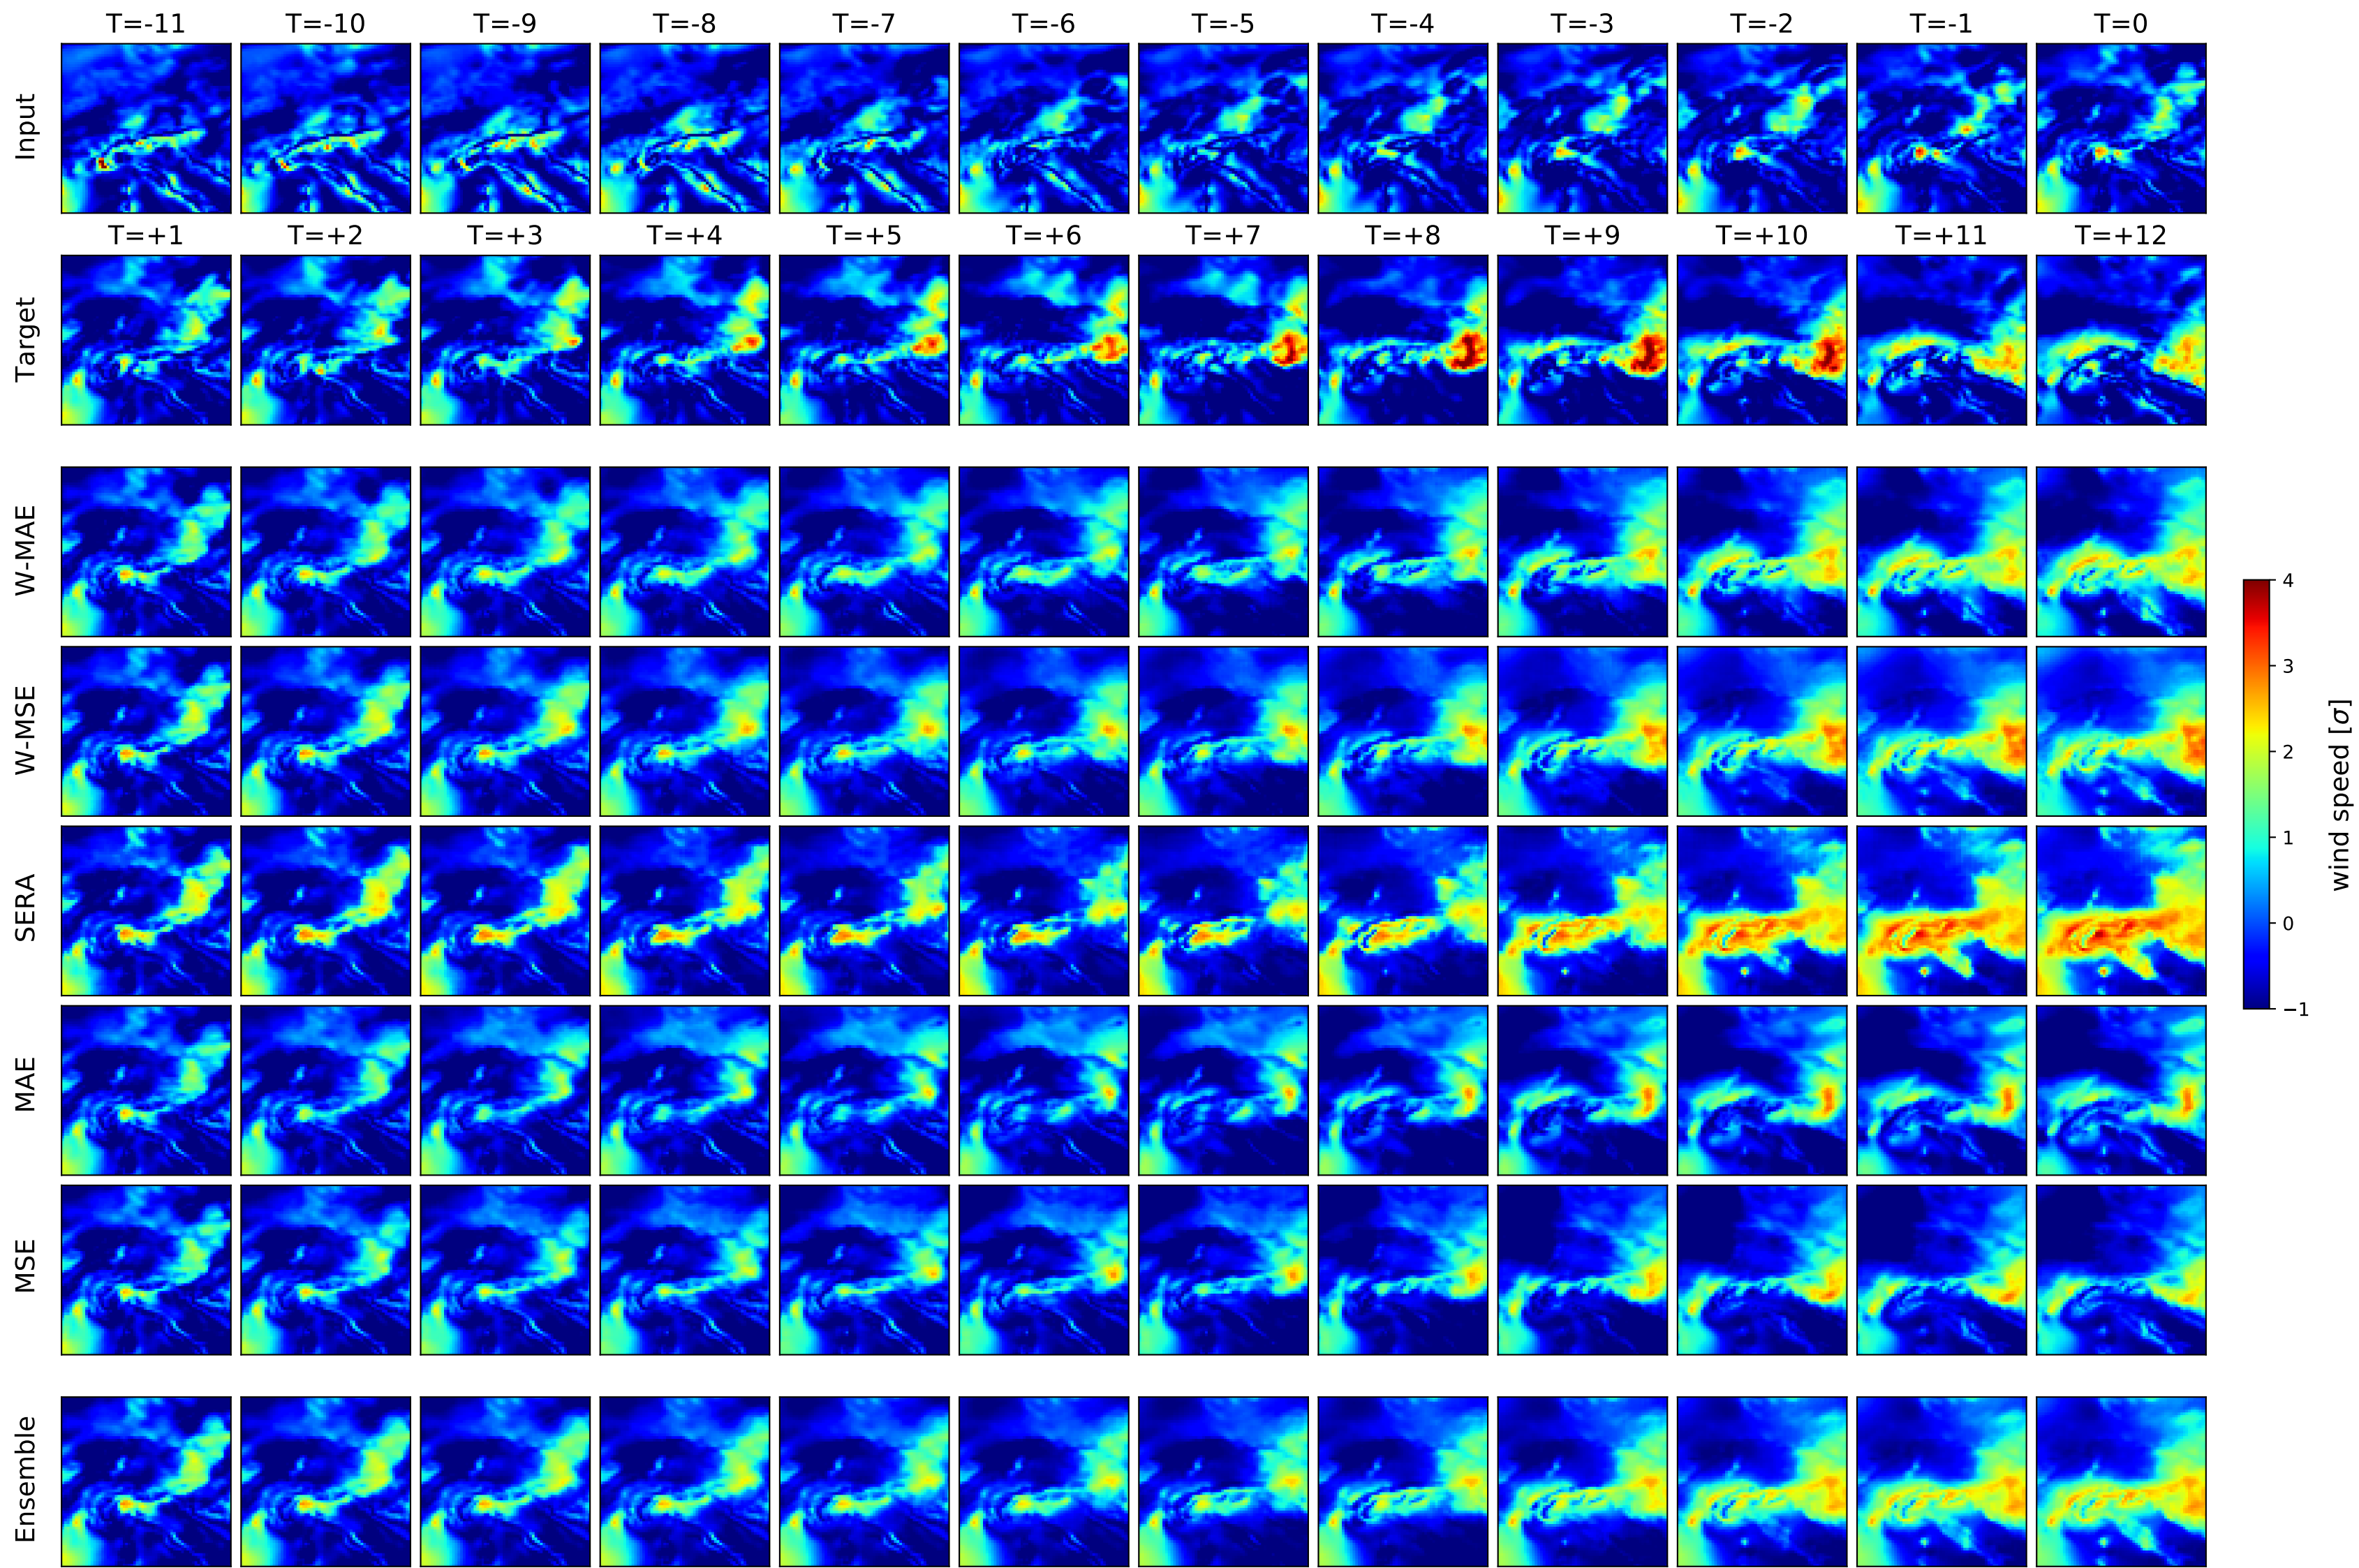

Supplement: Supplementary file 19 [file example_483.pdf › example_forecasts/example_483.pdf]

2019-01-16 00:00

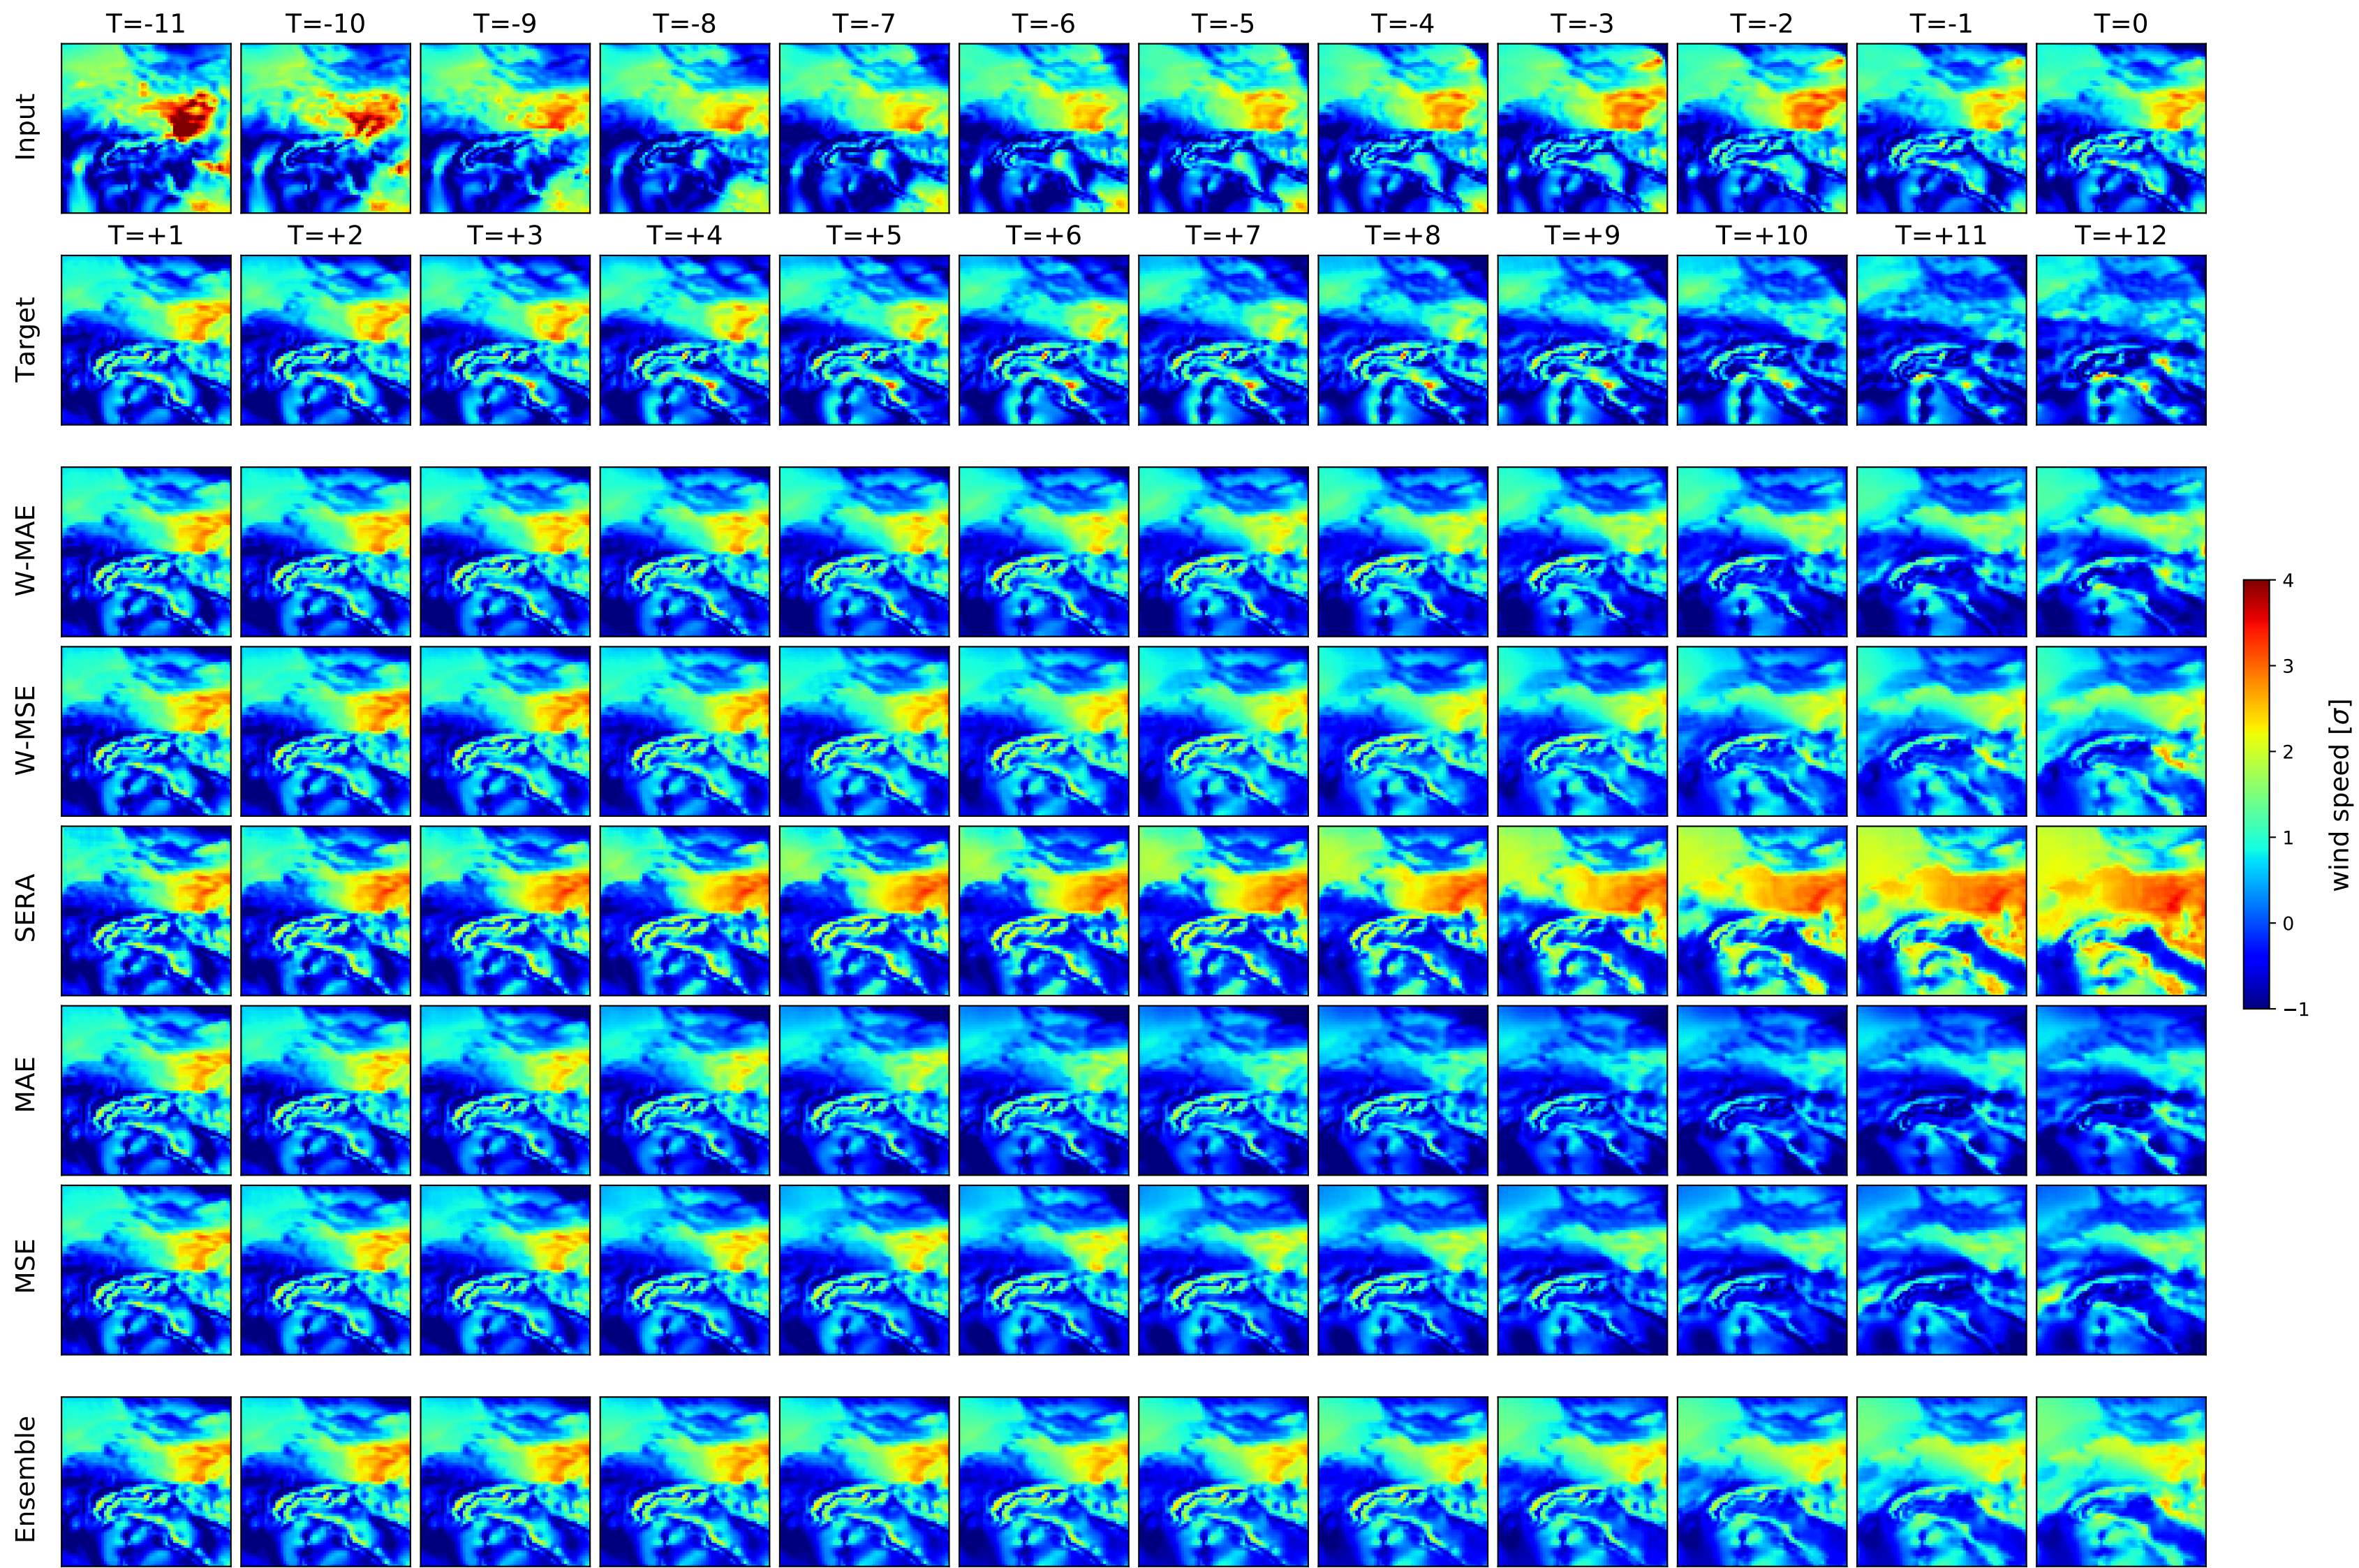

Supplement: Supplementary file 20 [file example_49.pdf › example_forecasts/example_49.pdf]

2019-09-26 12:00

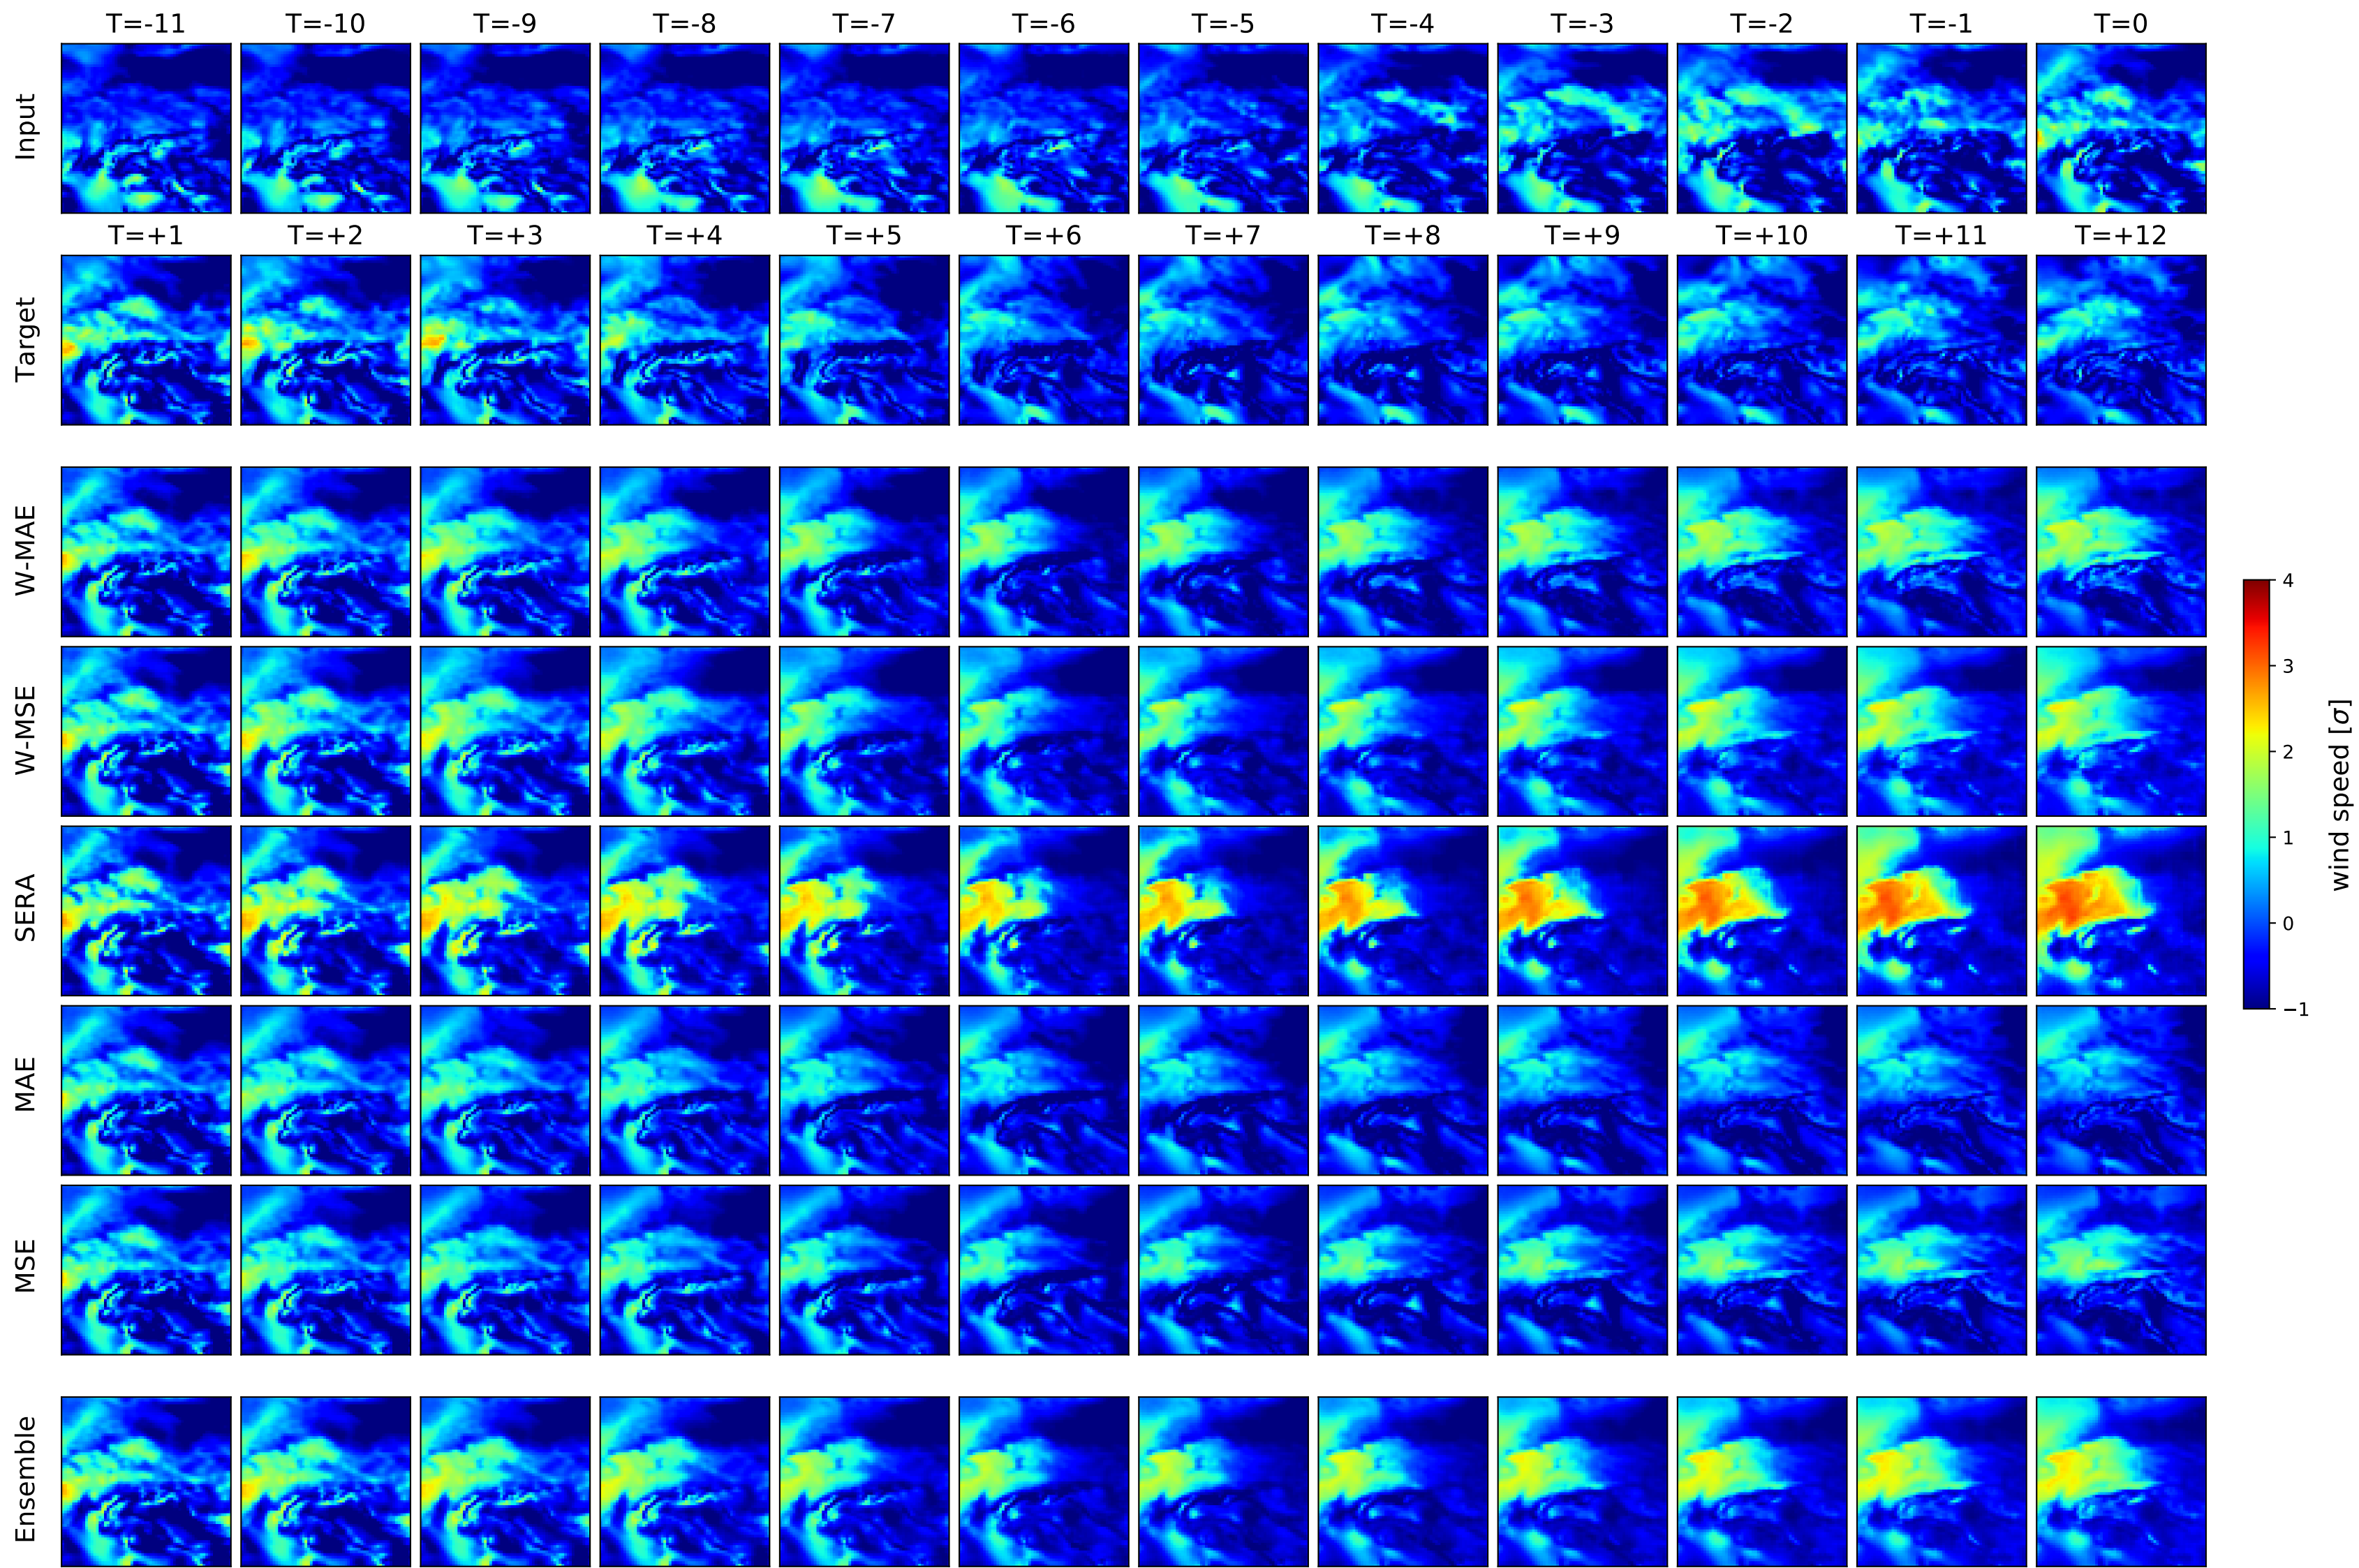

Supplement: Supplementary file 21 [file example_556.pdf › example_forecasts/example_556.pdf]

2019-11-05 00:00

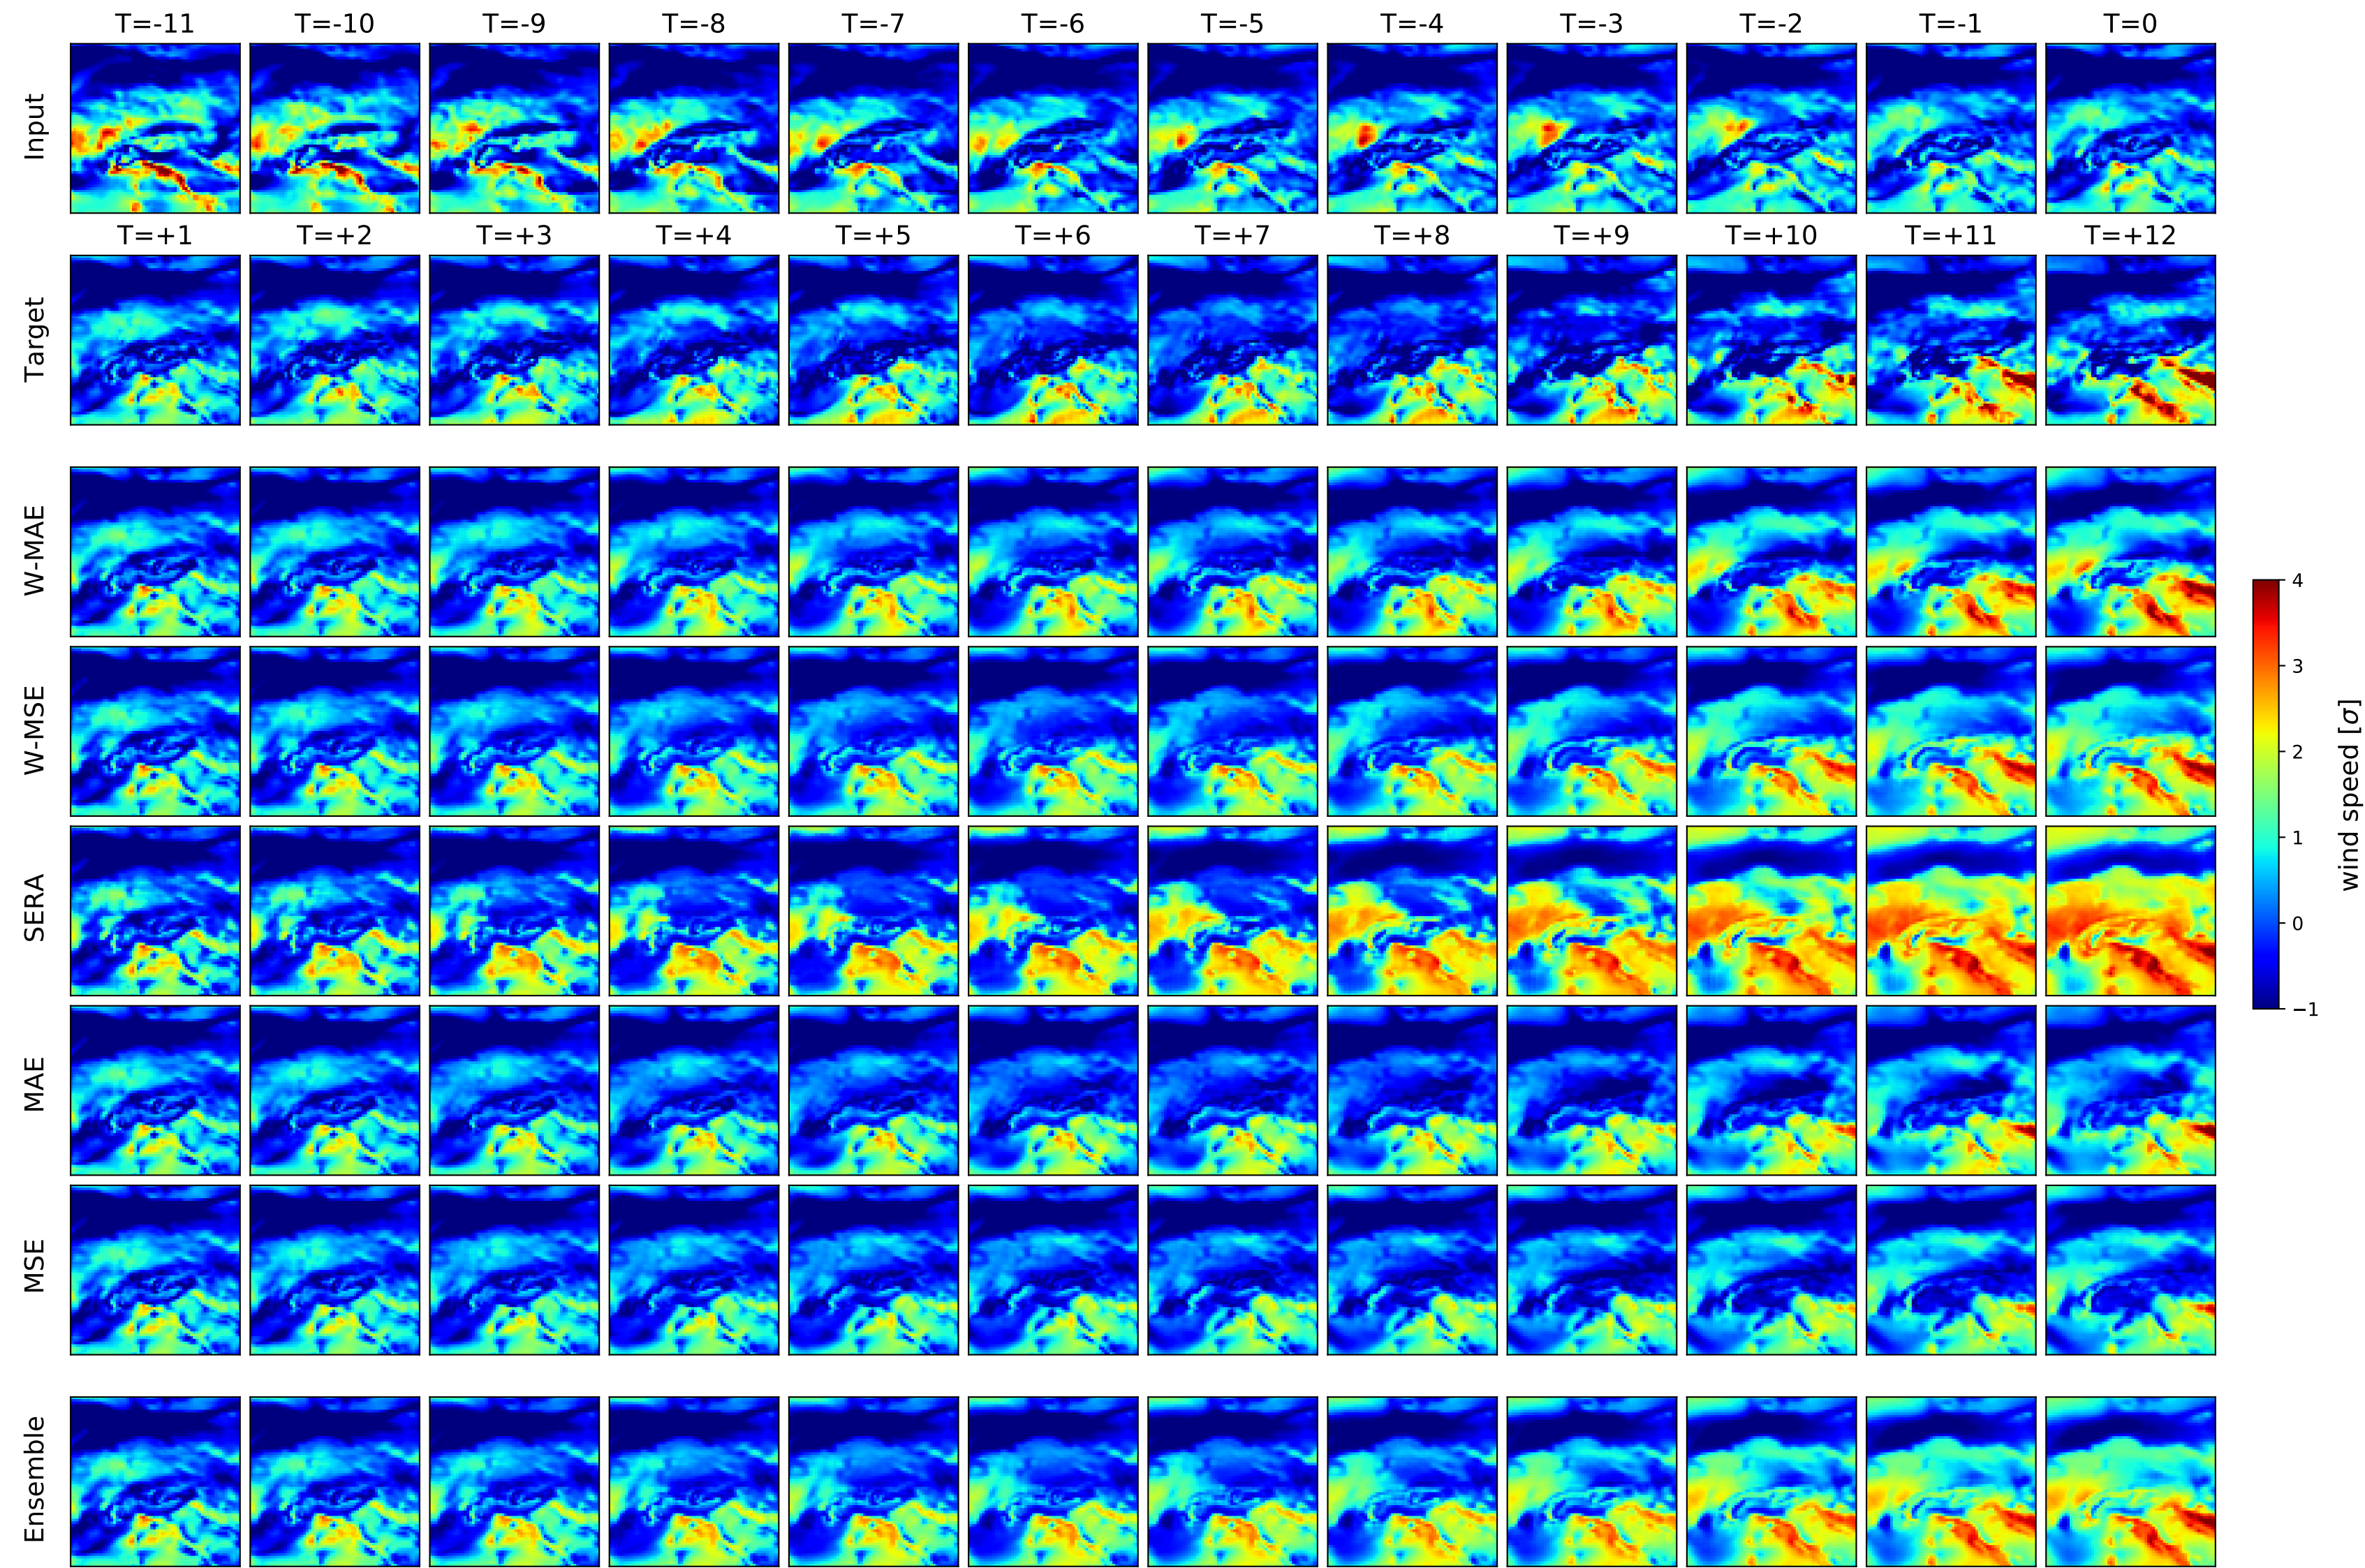

Supplement: Supplementary file 22 [file example_635.pdf › example_forecasts/example_635.pdf]

2019-11-22 12:00

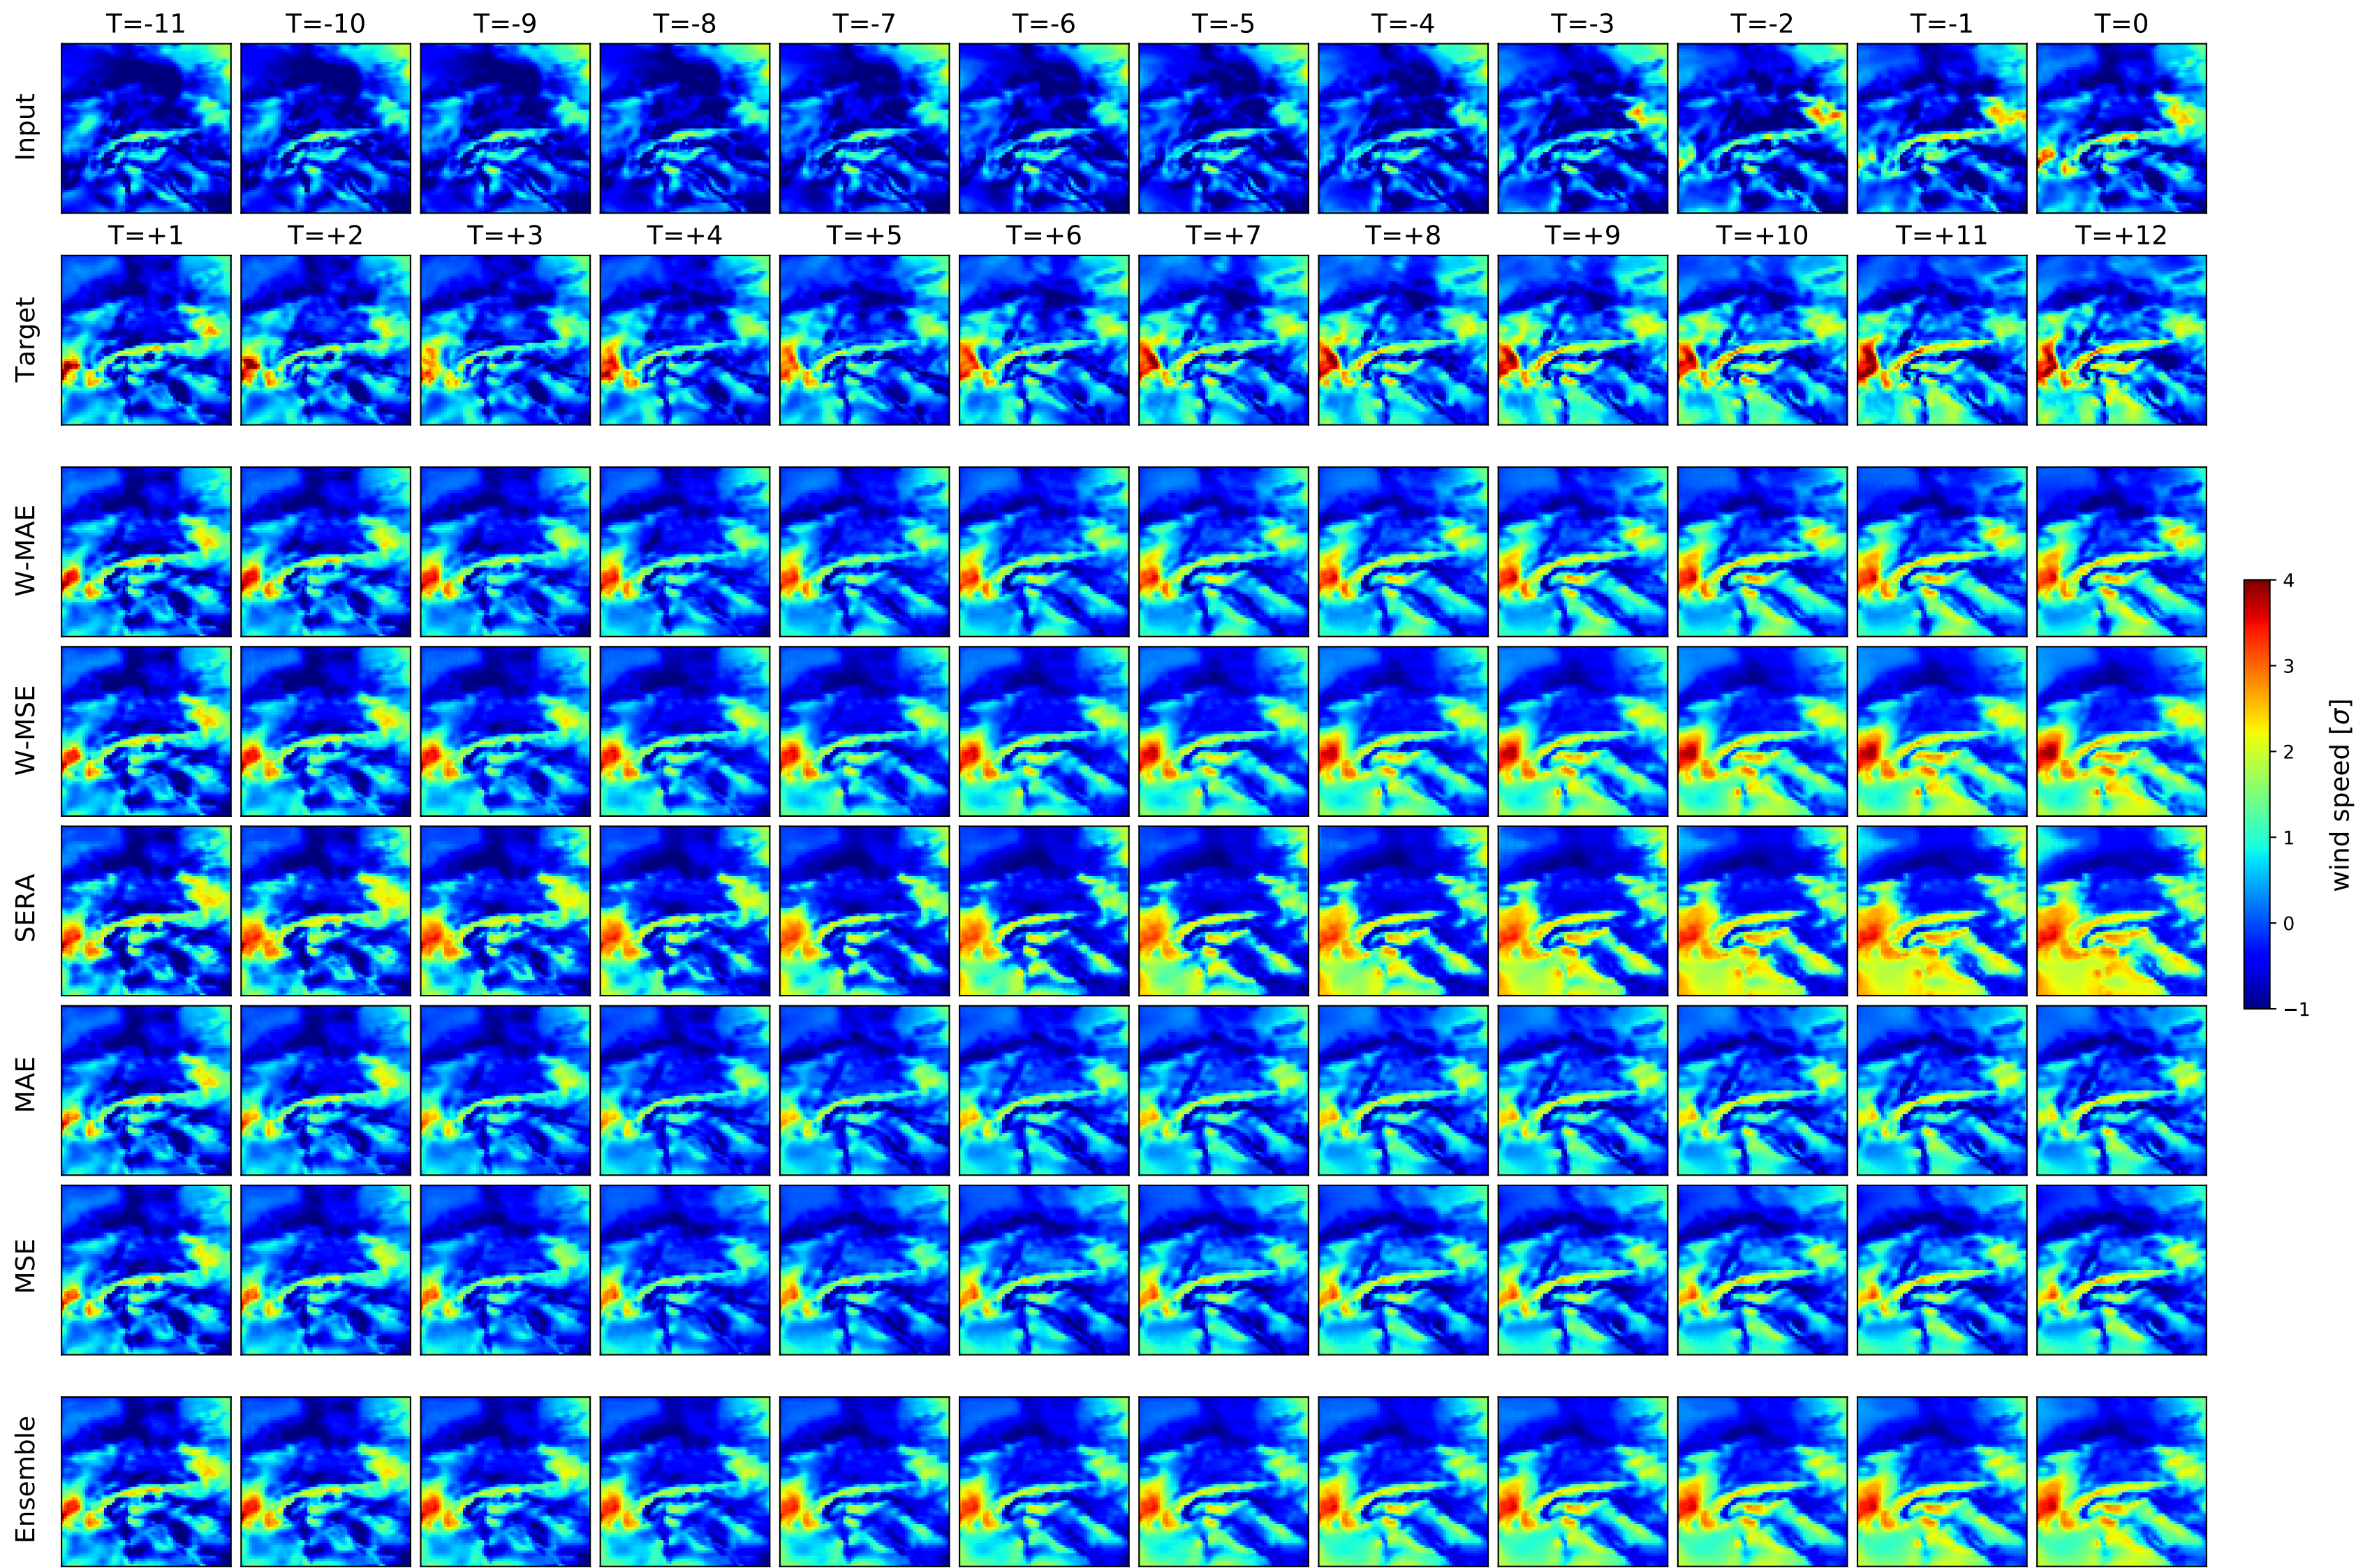

Supplement: Supplementary file 23 [file example_670.pdf › example_forecasts/example_670.pdf]

2019-12-09 12:00

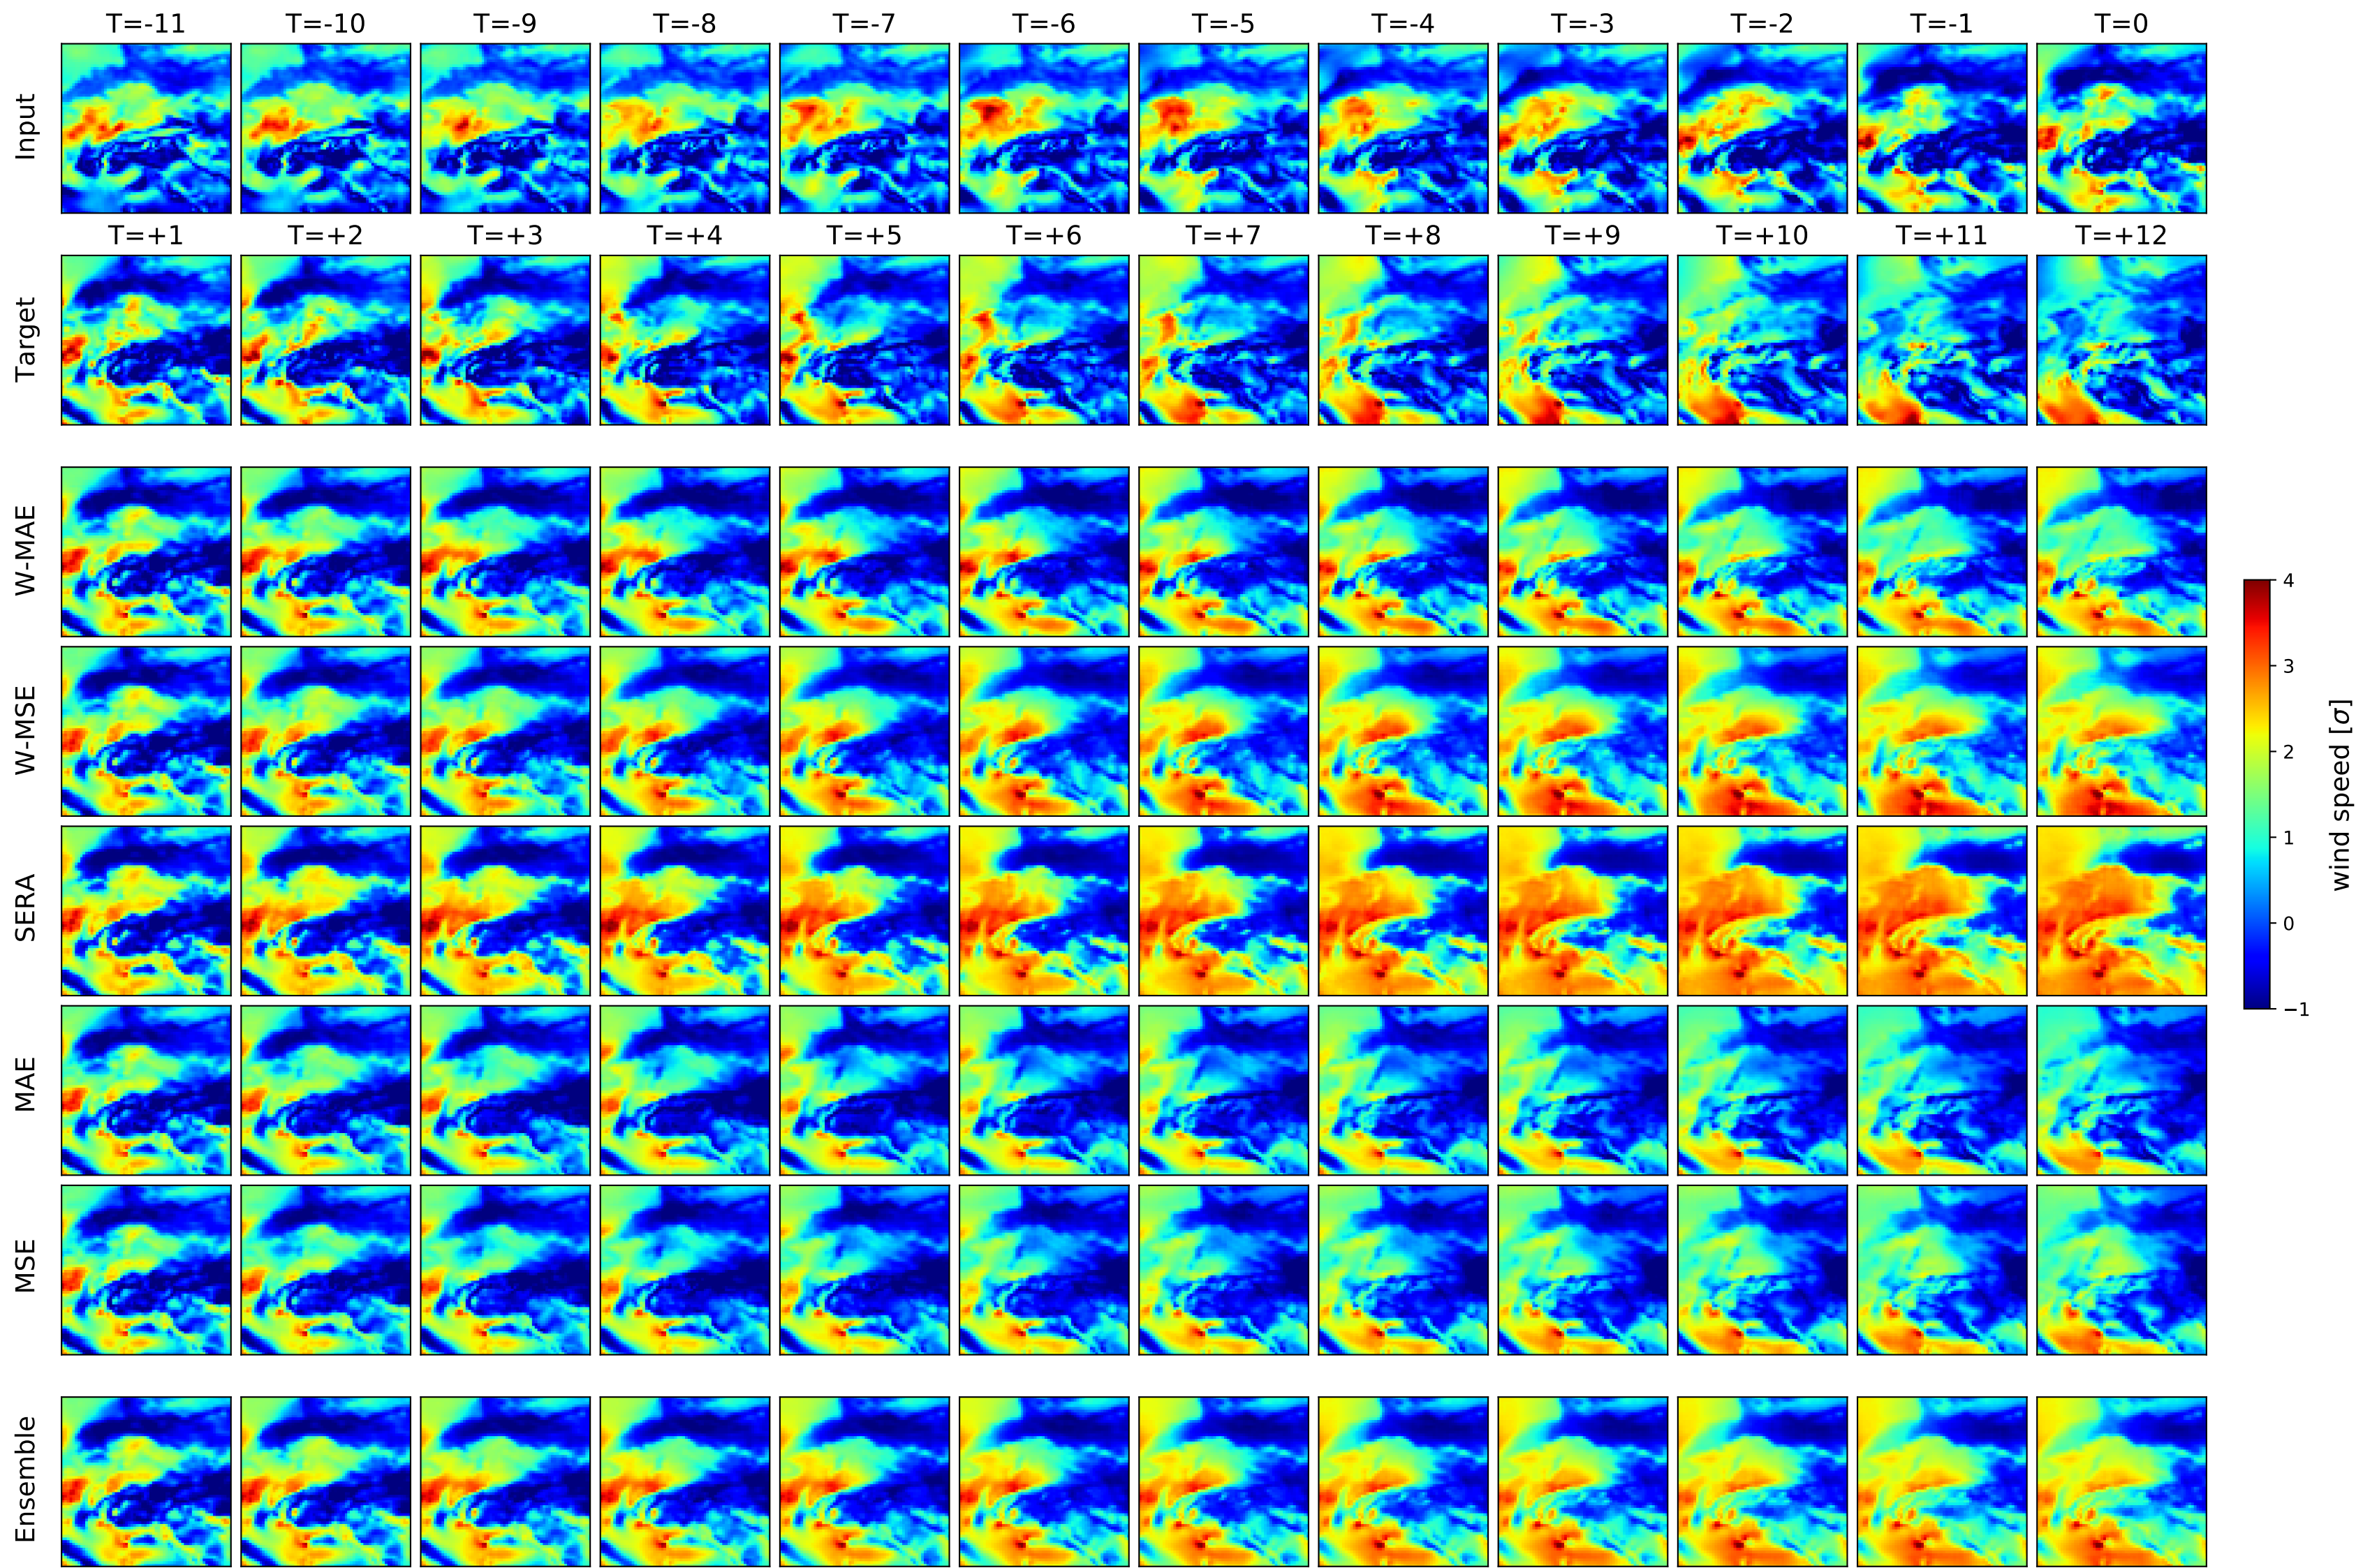

Supplement: Supplementary file 24 [file example_704.pdf › example_forecasts/example_704.pdf]

2019-12-14 12:00

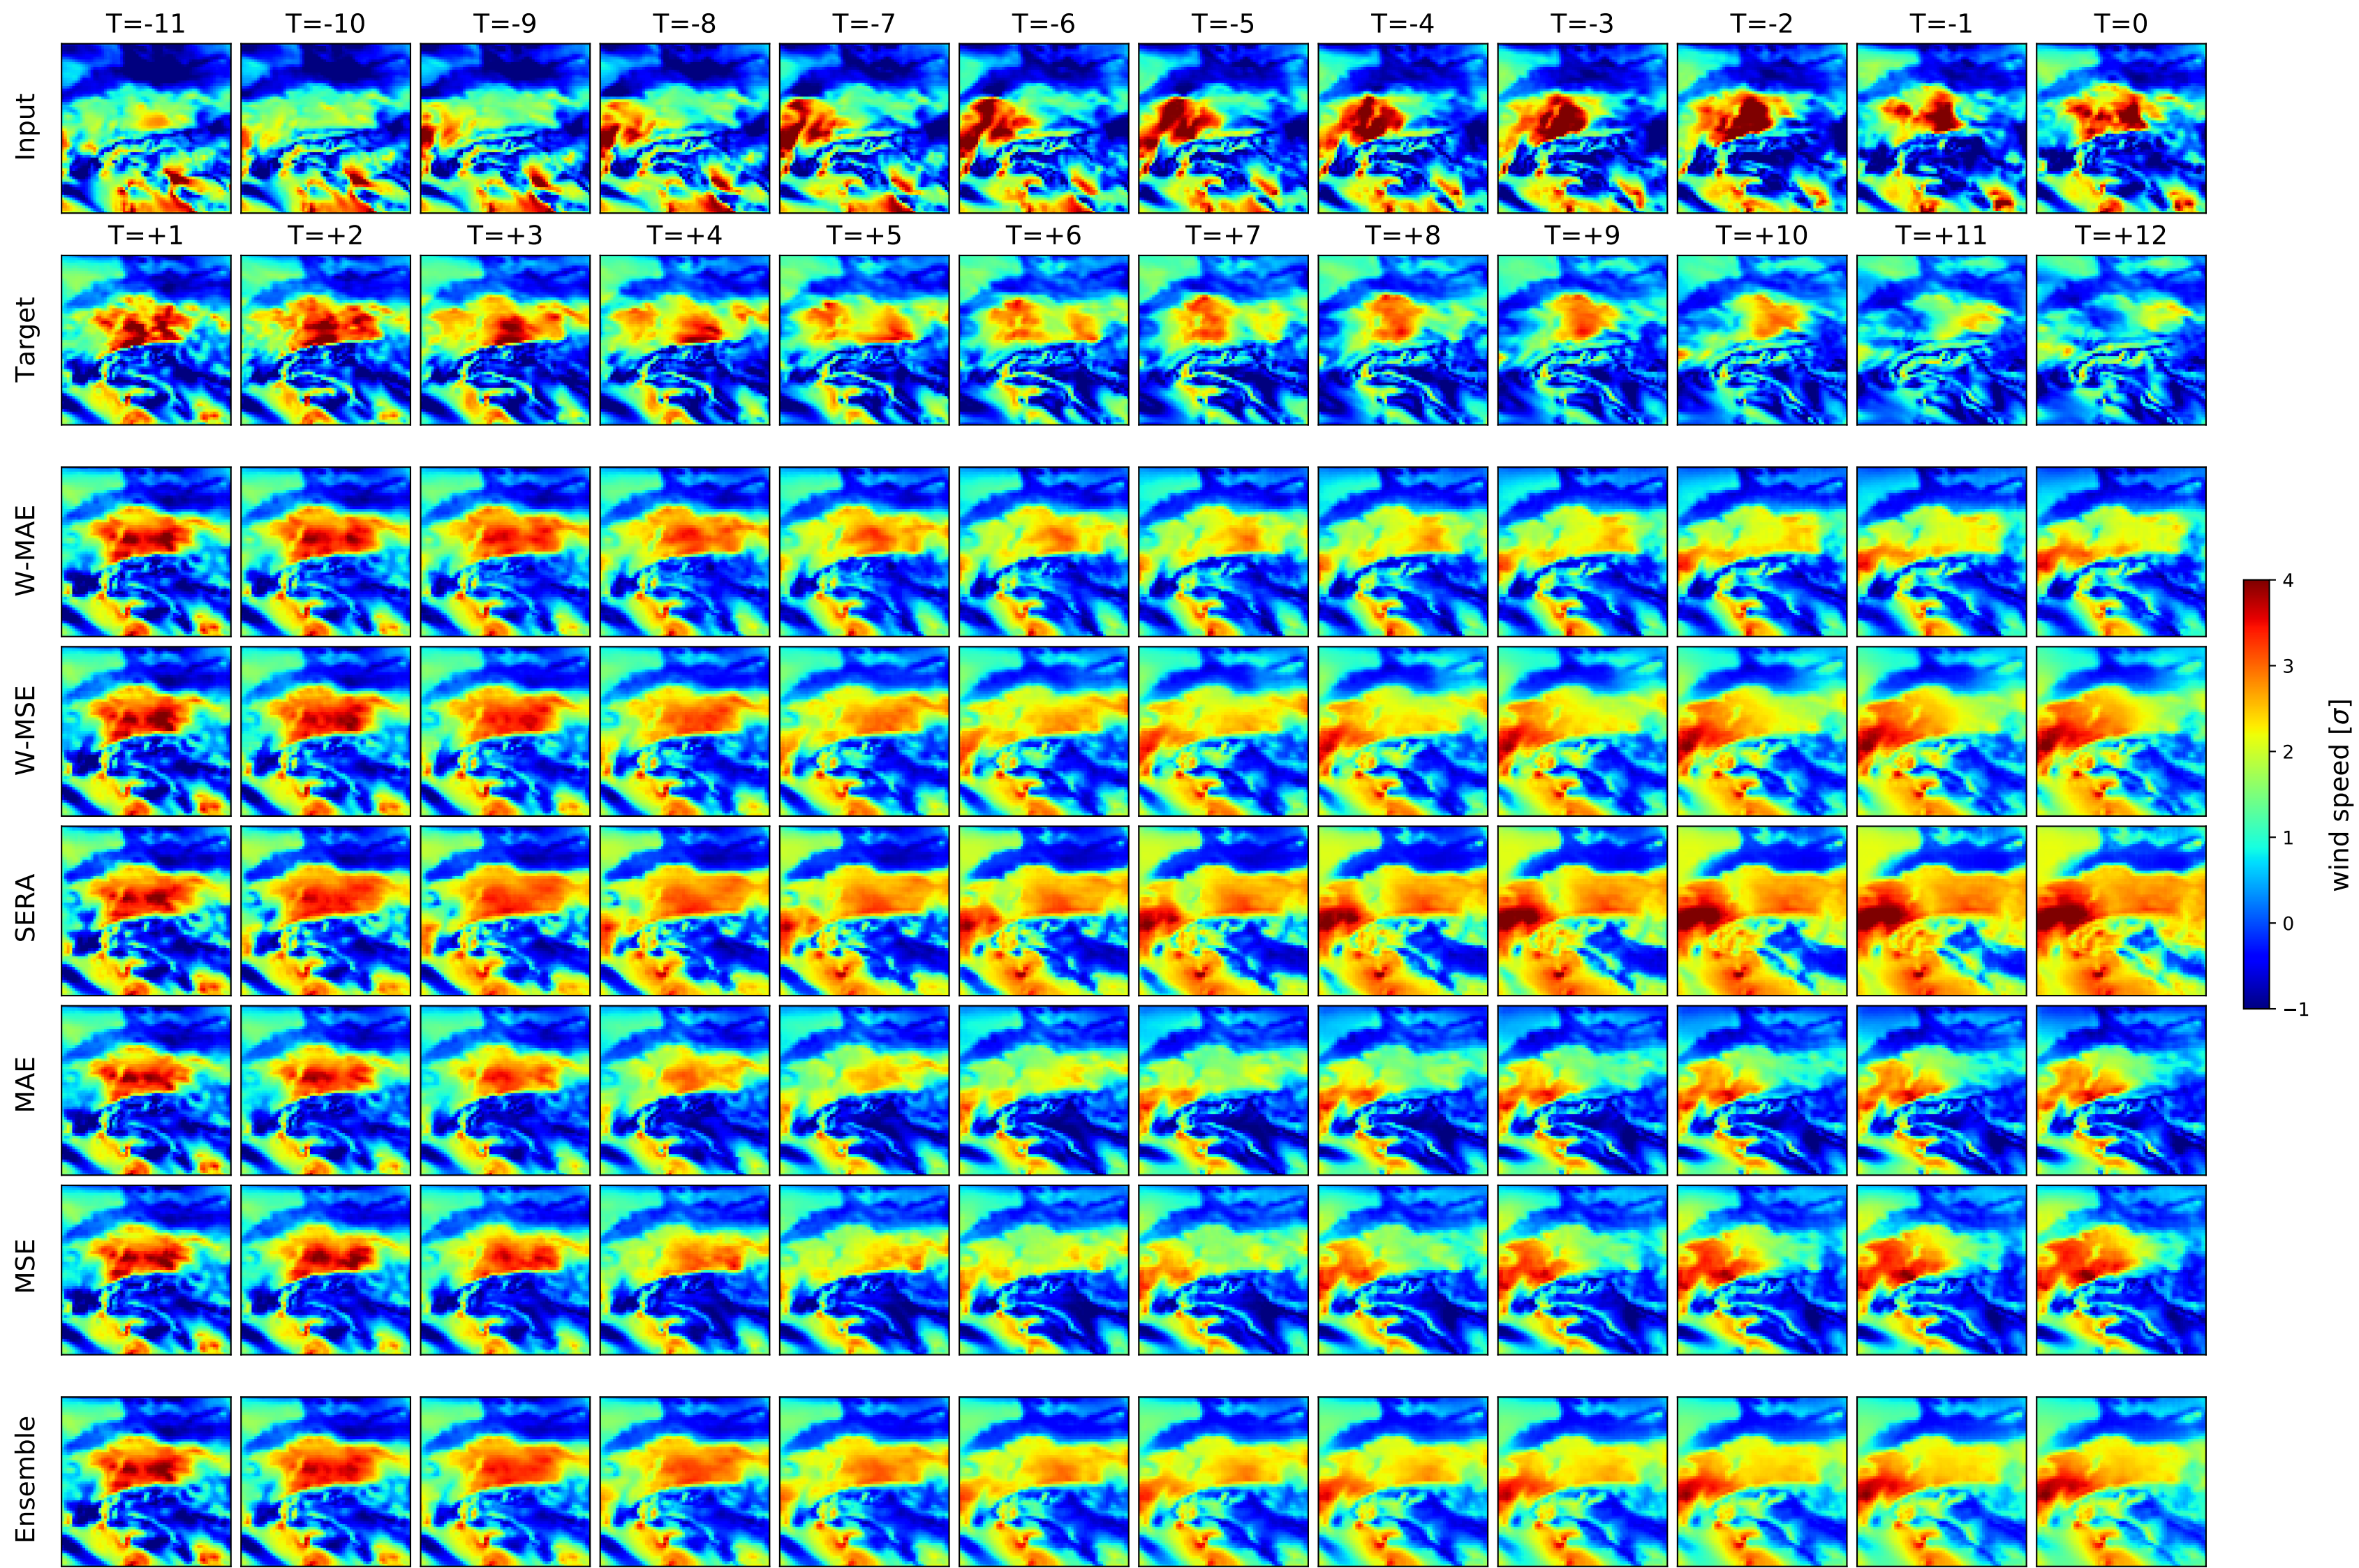

Supplement: Supplementary file 25 [file example_714.pdf › example_forecasts/example_714.pdf]

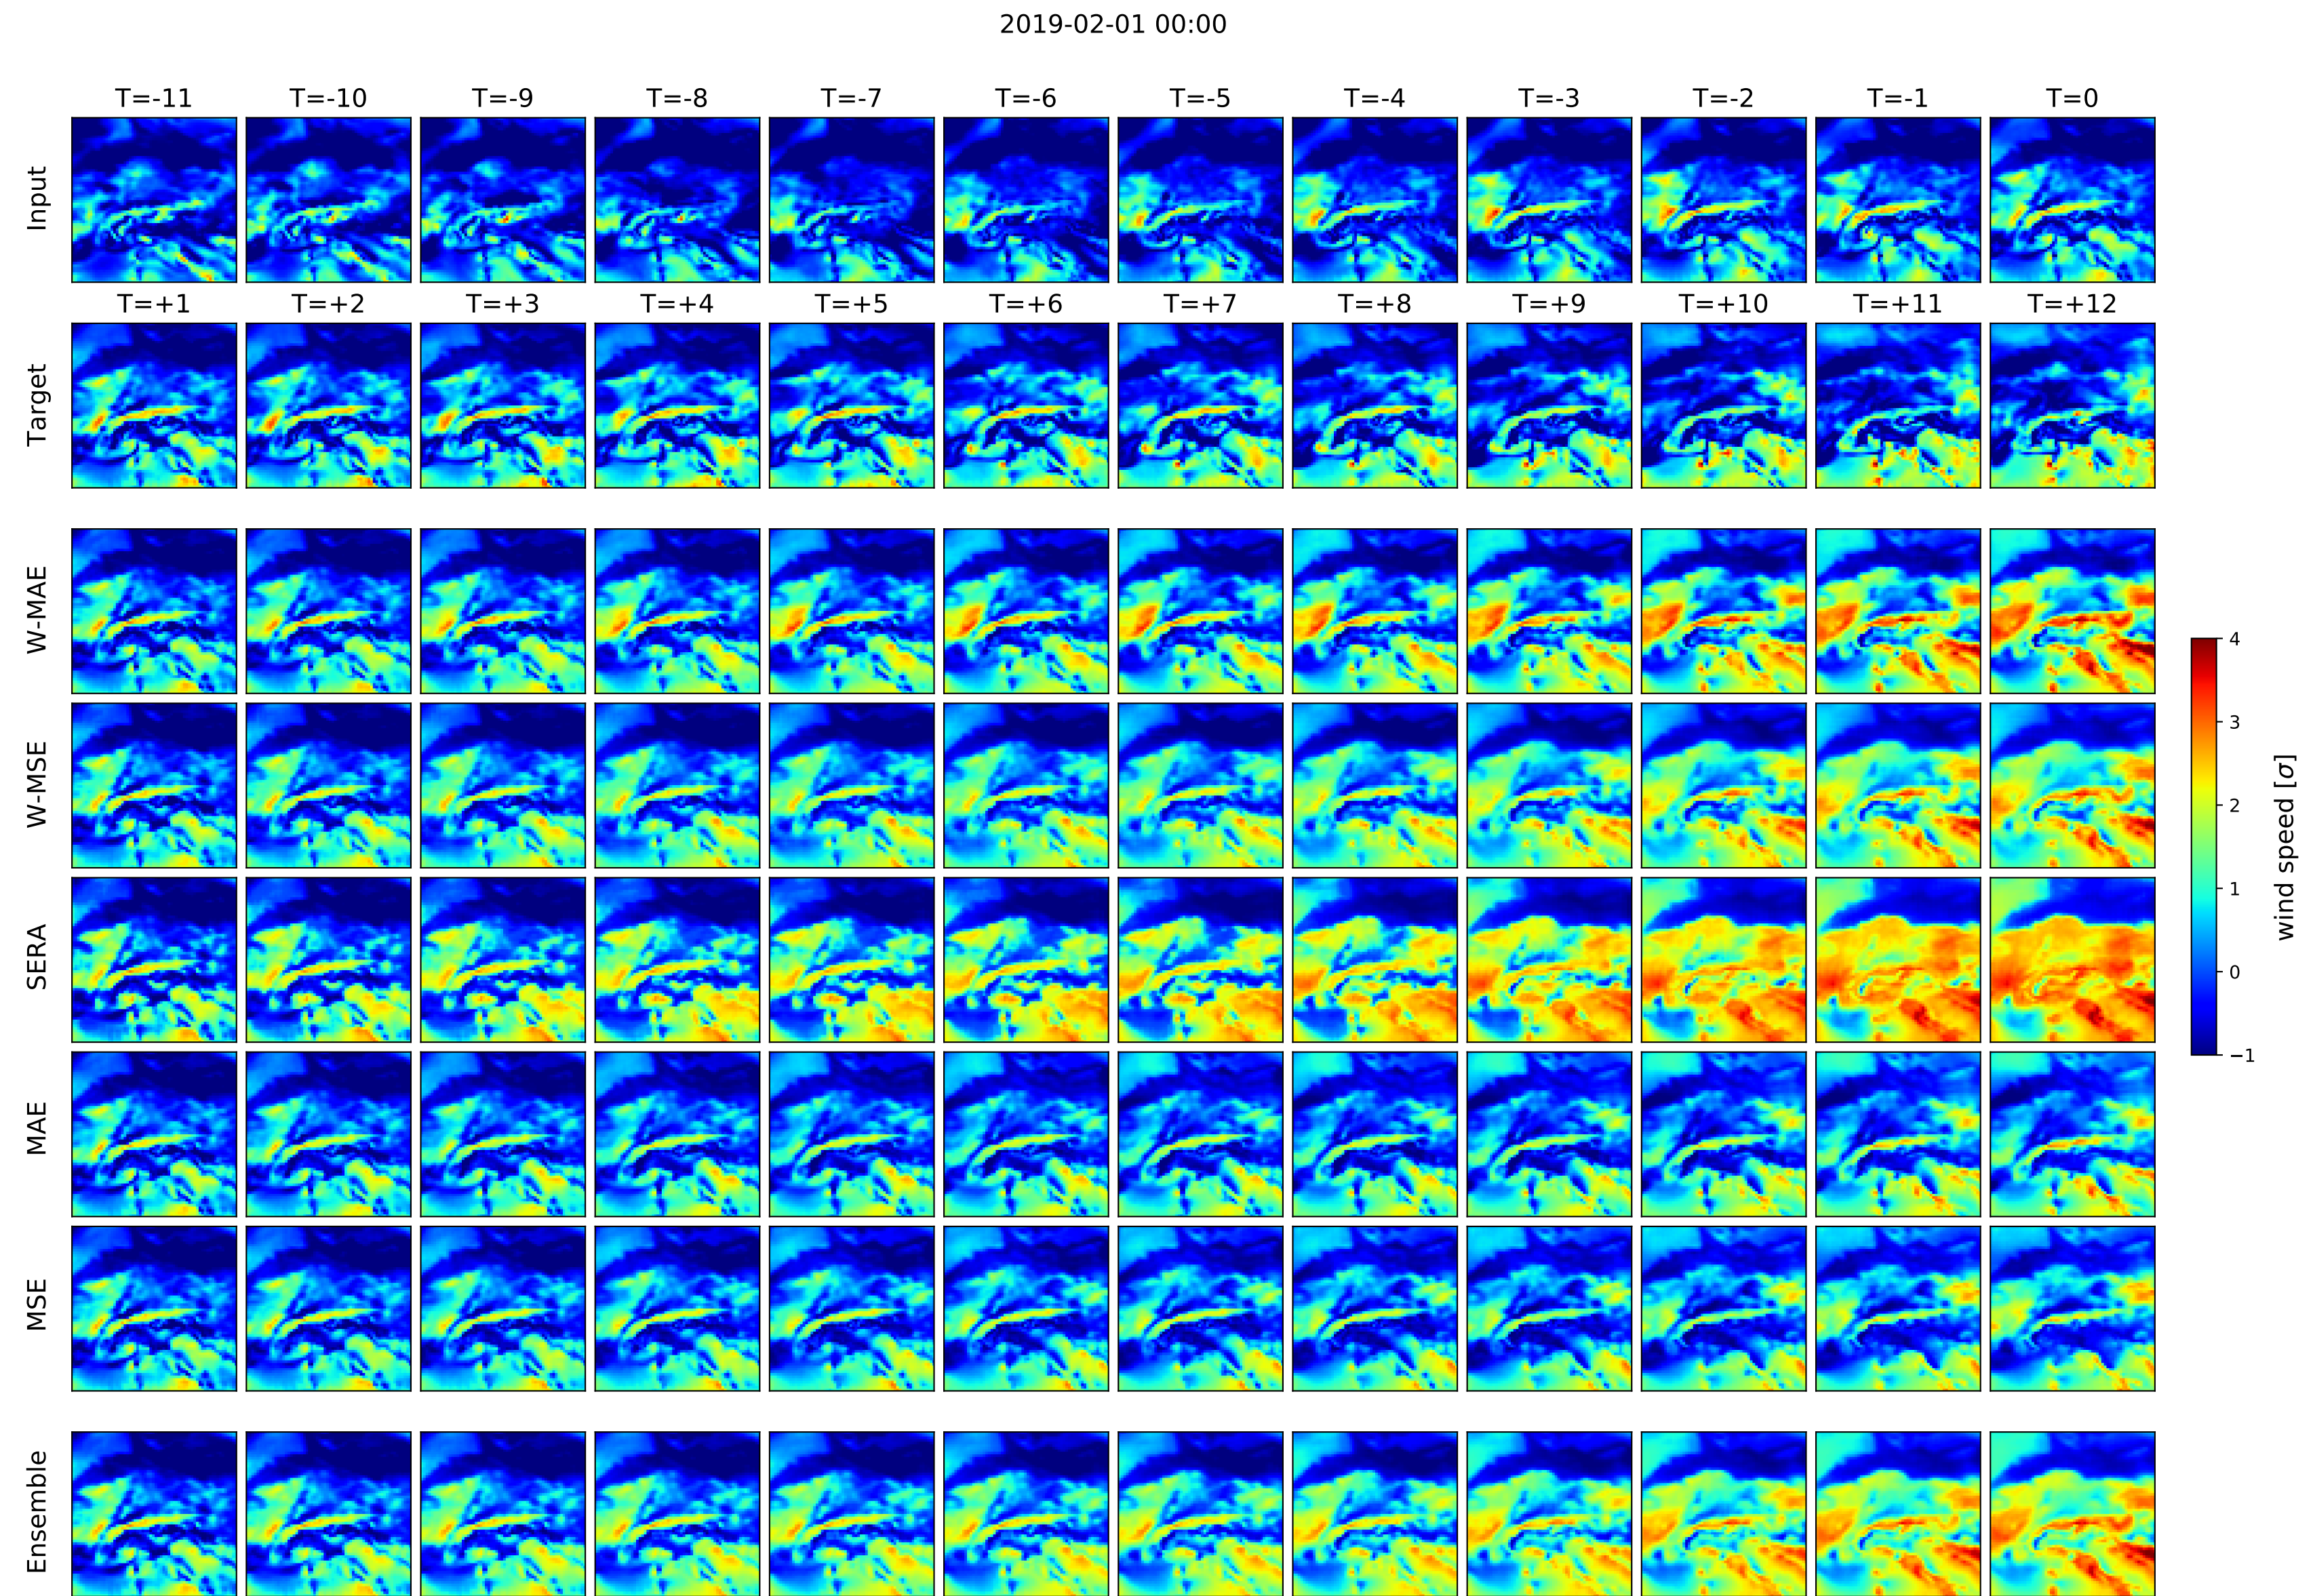

Supplement: Supplementary file 26 [file example_81.pdf › example_forecasts/example_81.pdf]

2020-02-26 00:00

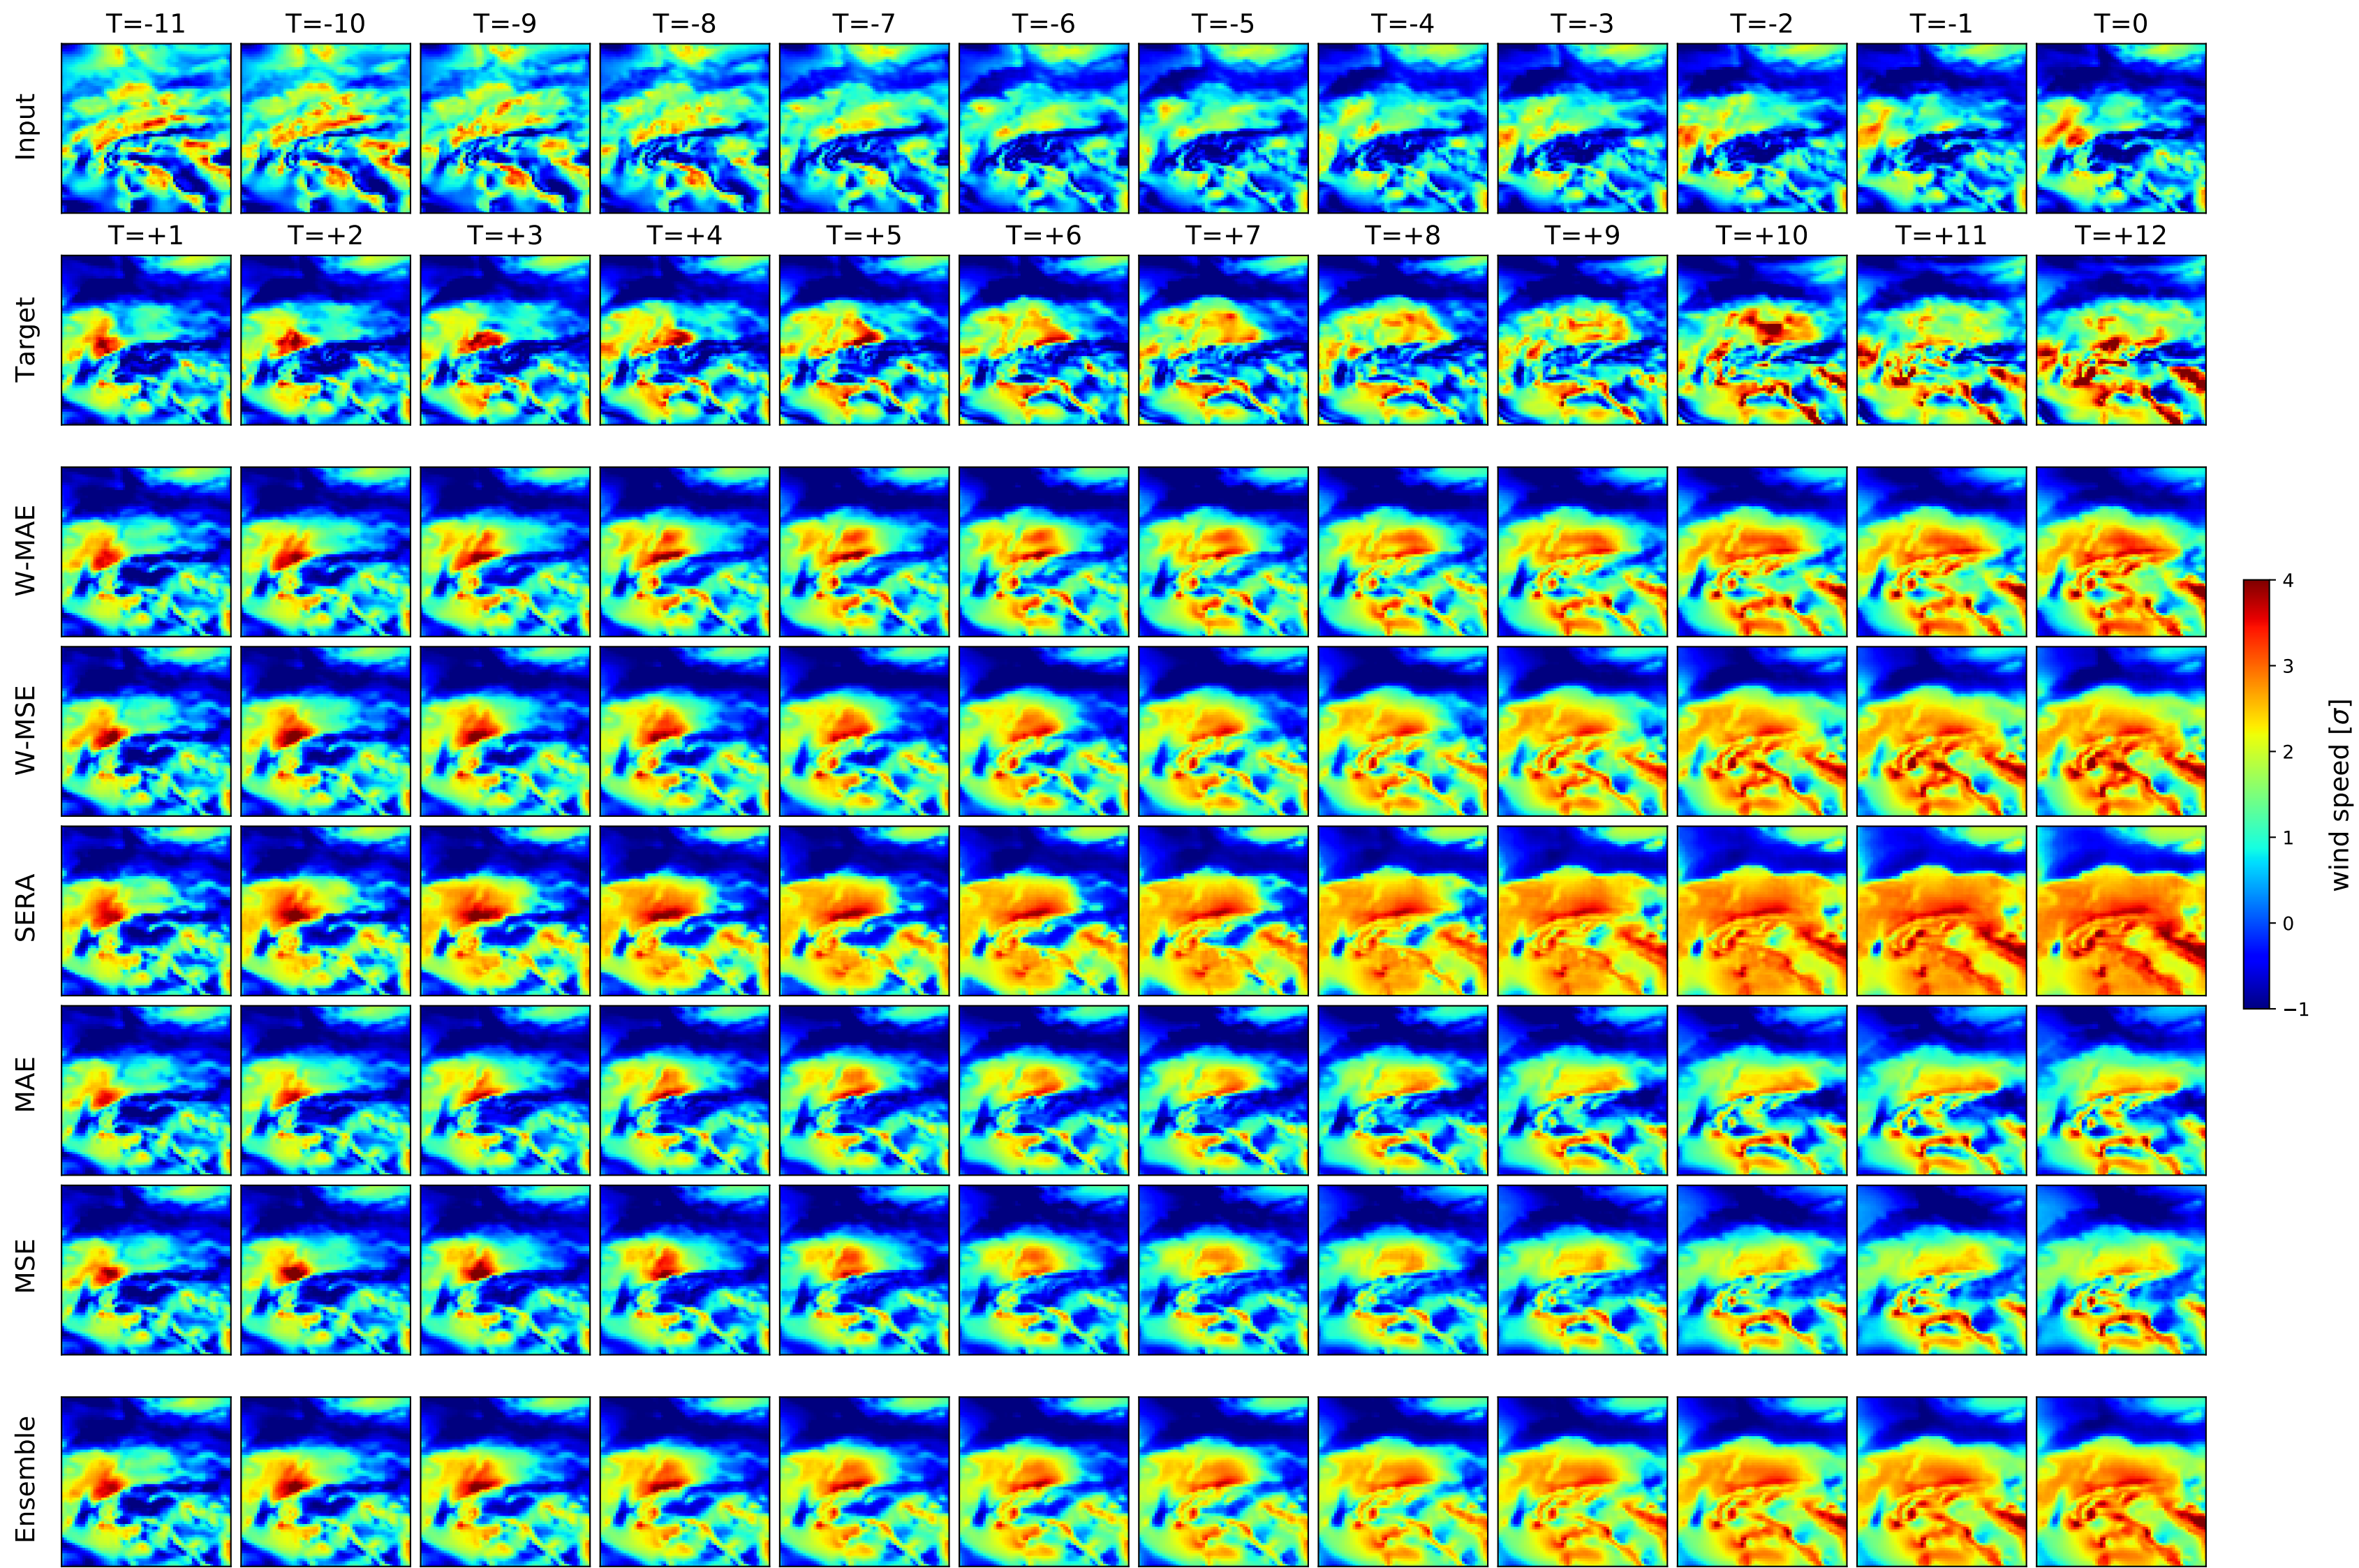

Supplement: Supplementary file 27 [file example_861.pdf › example_forecasts/example_861.pdf]

2020-02-29 00:00

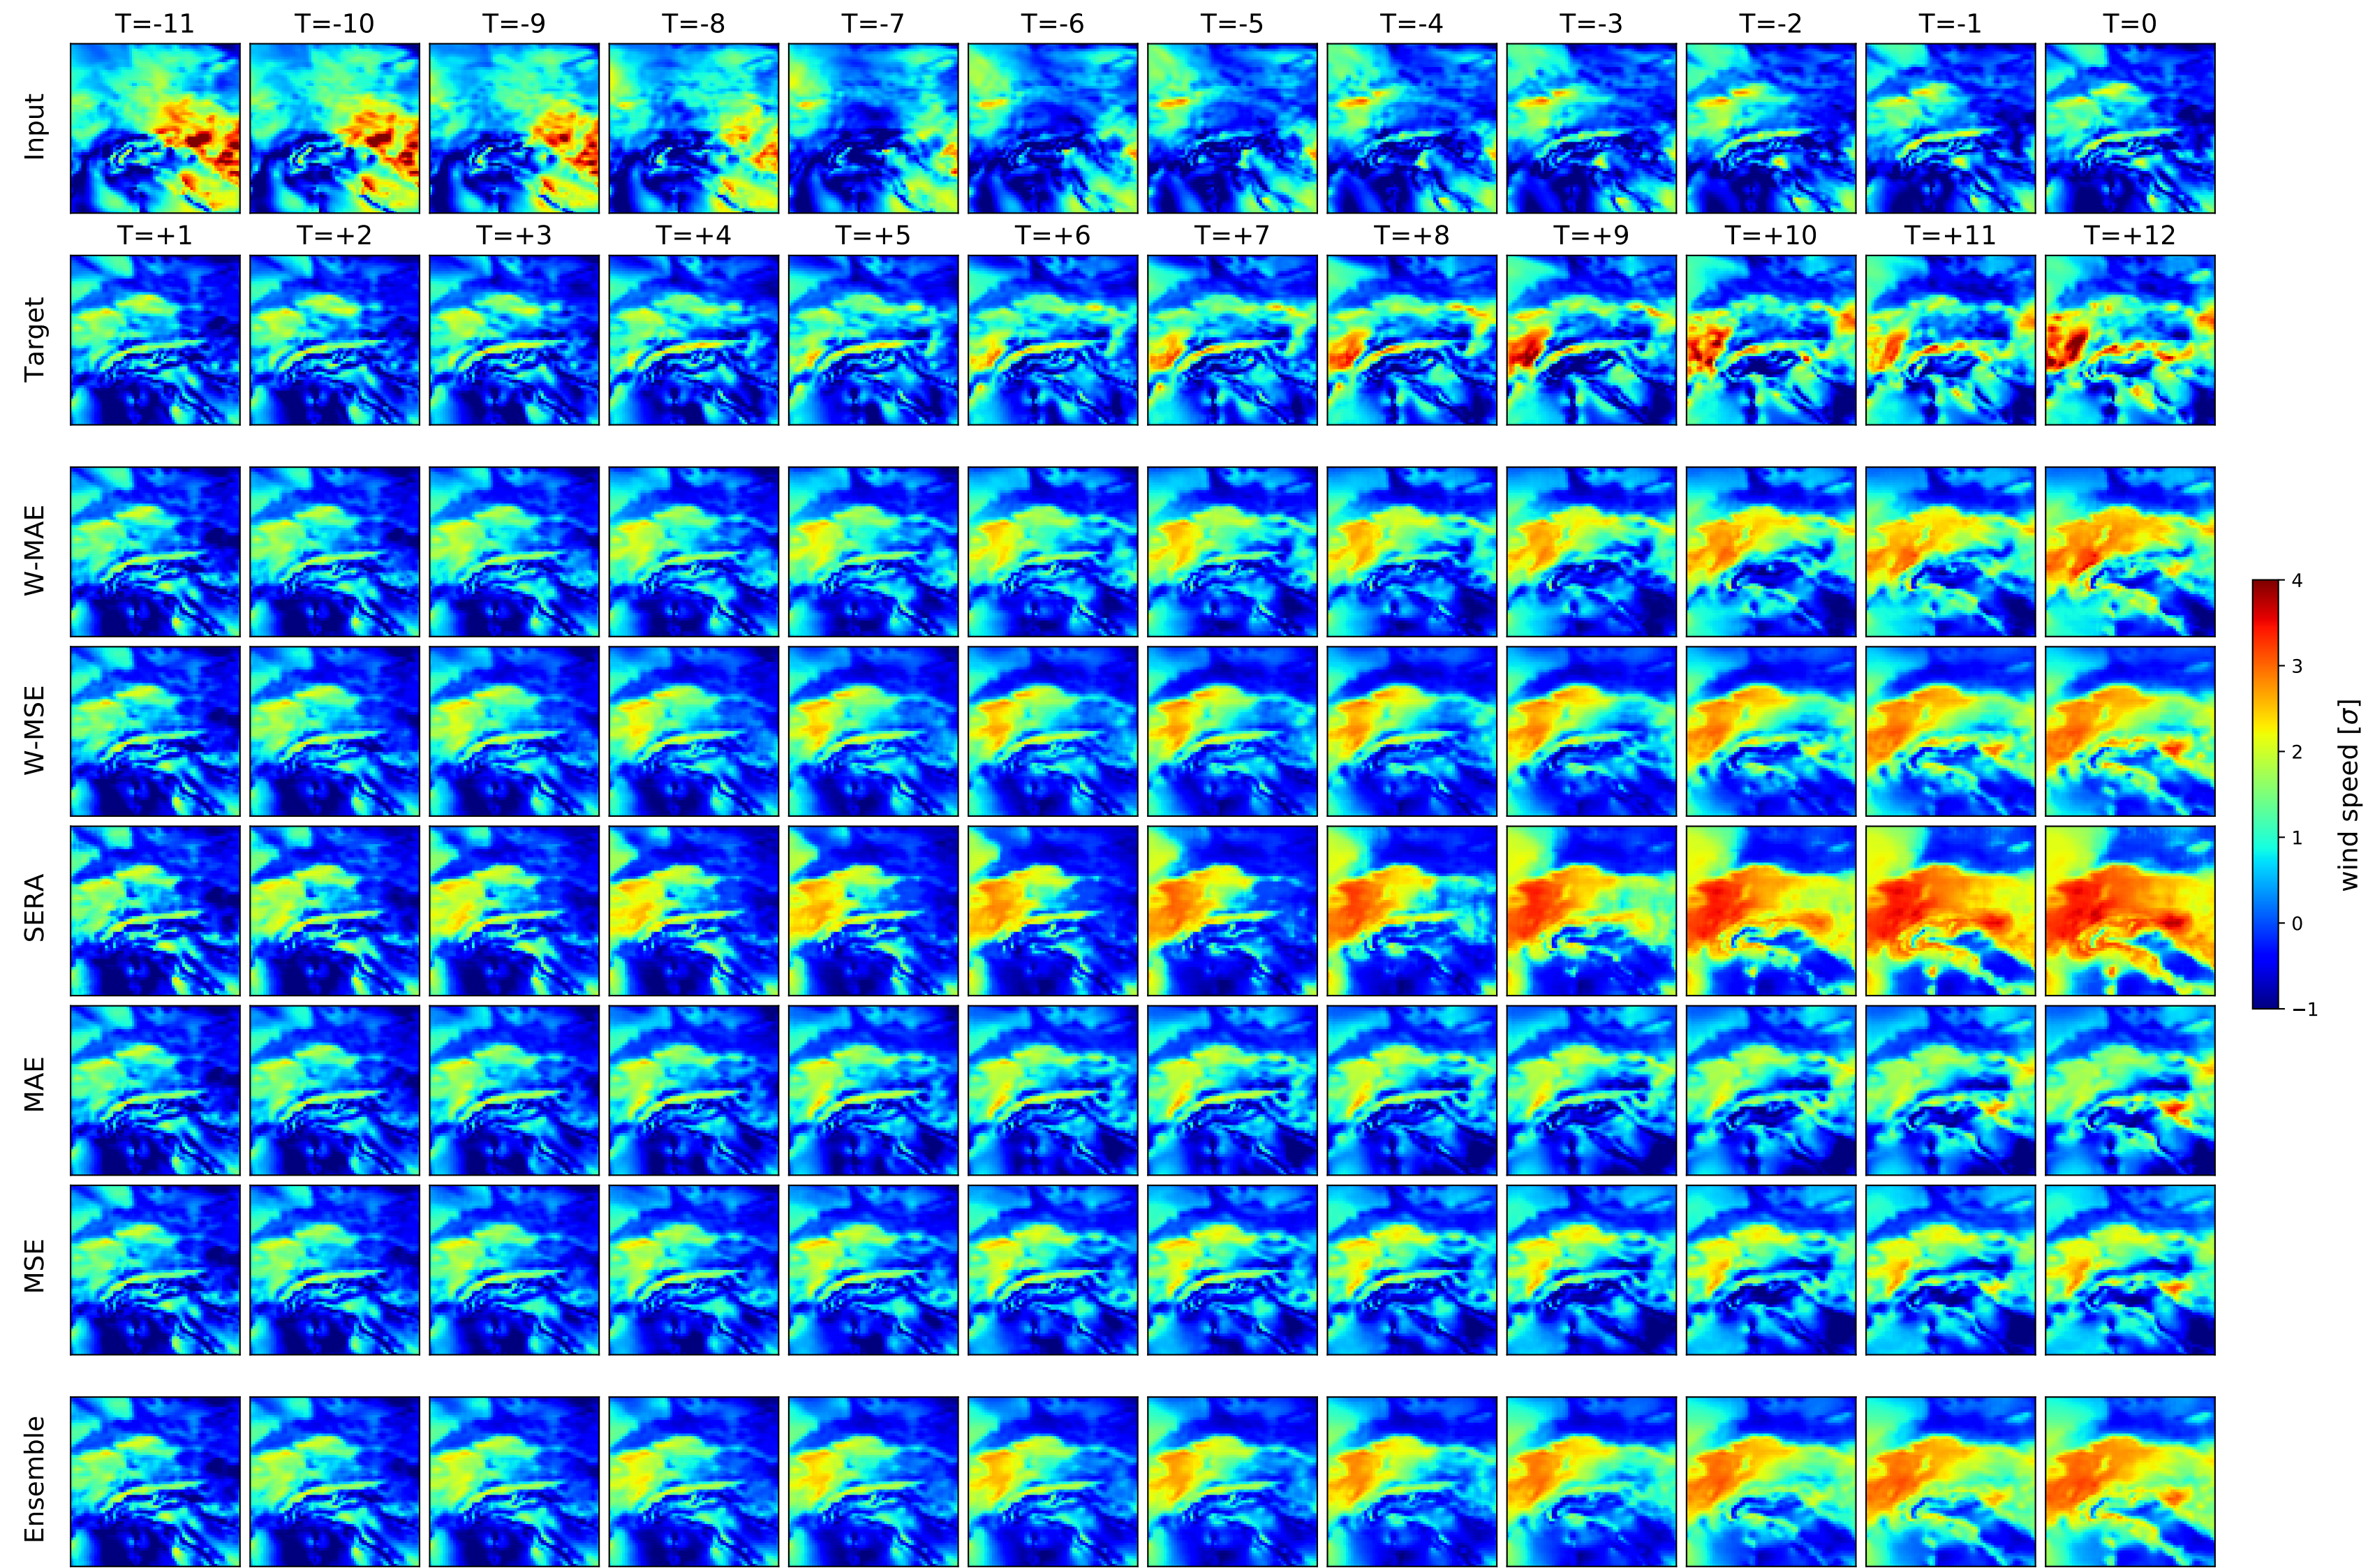

Supplement: Supplementary file 28 [file example_867.pdf › example_forecasts/example_867.pdf]

2020-03-01 12:00

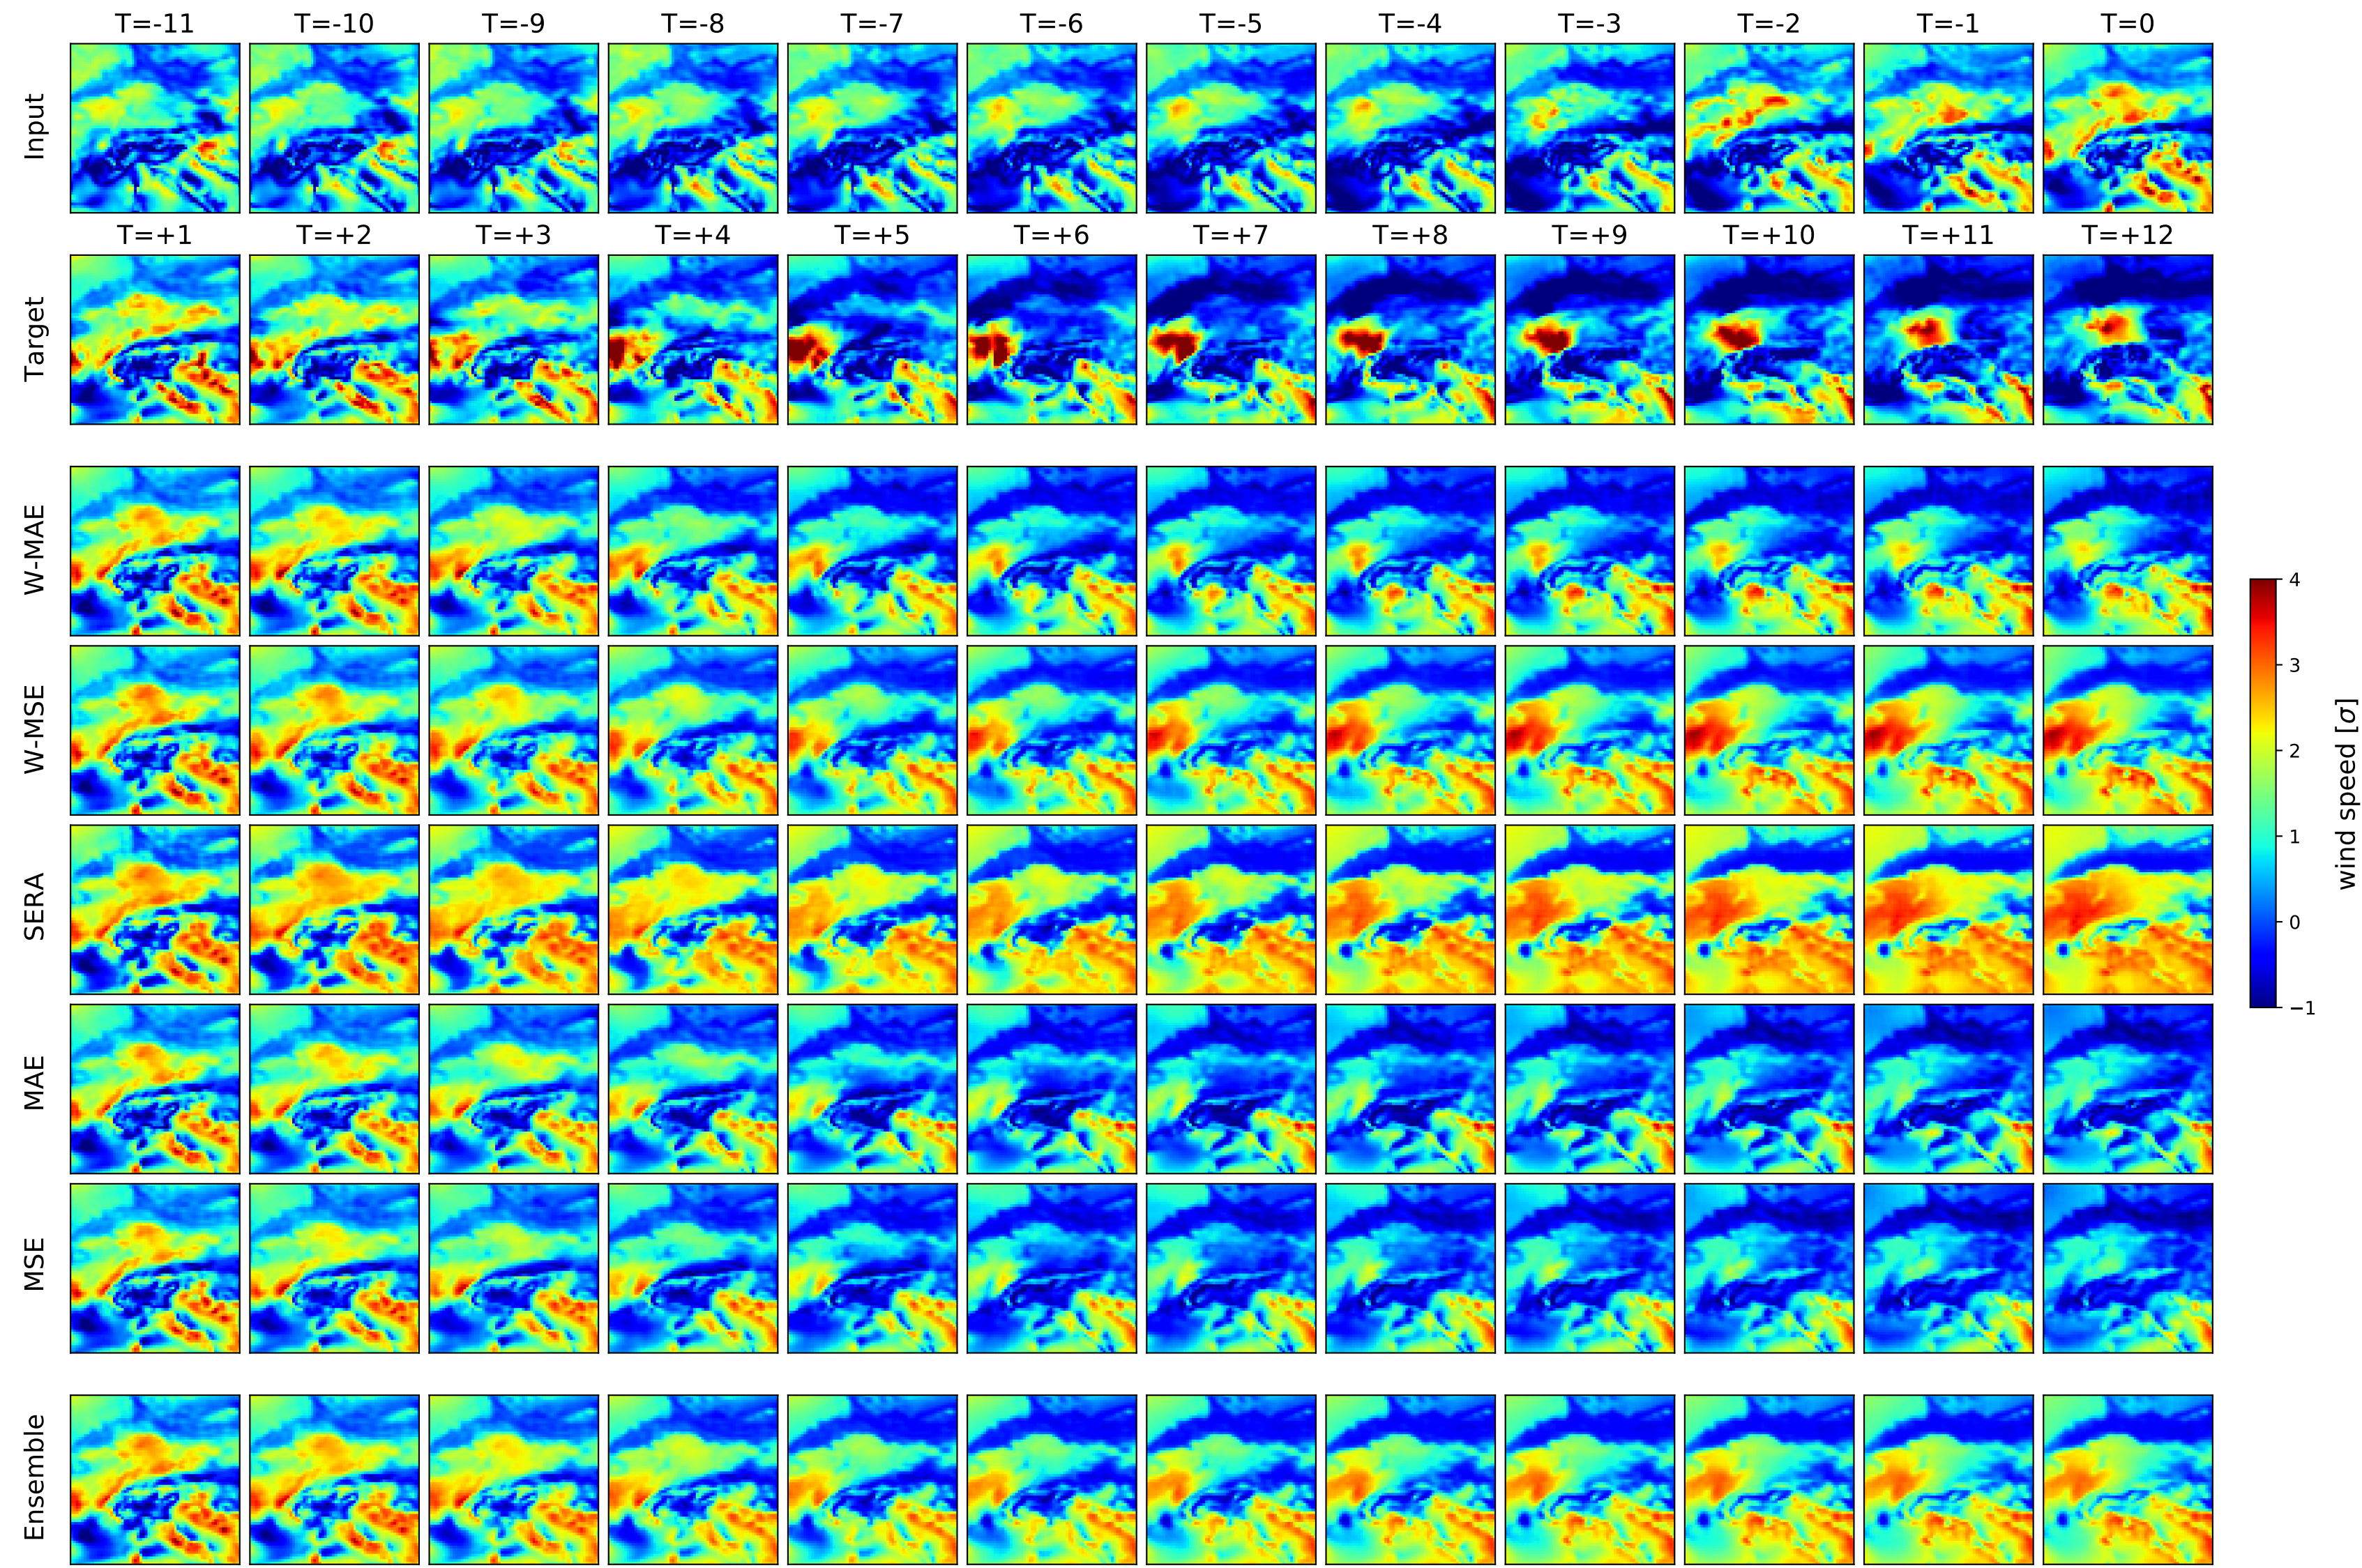

Supplement: Supplementary file 29 [file example_870.pdf › example_forecasts/example_870.pdf]

2020-03-12 00:00

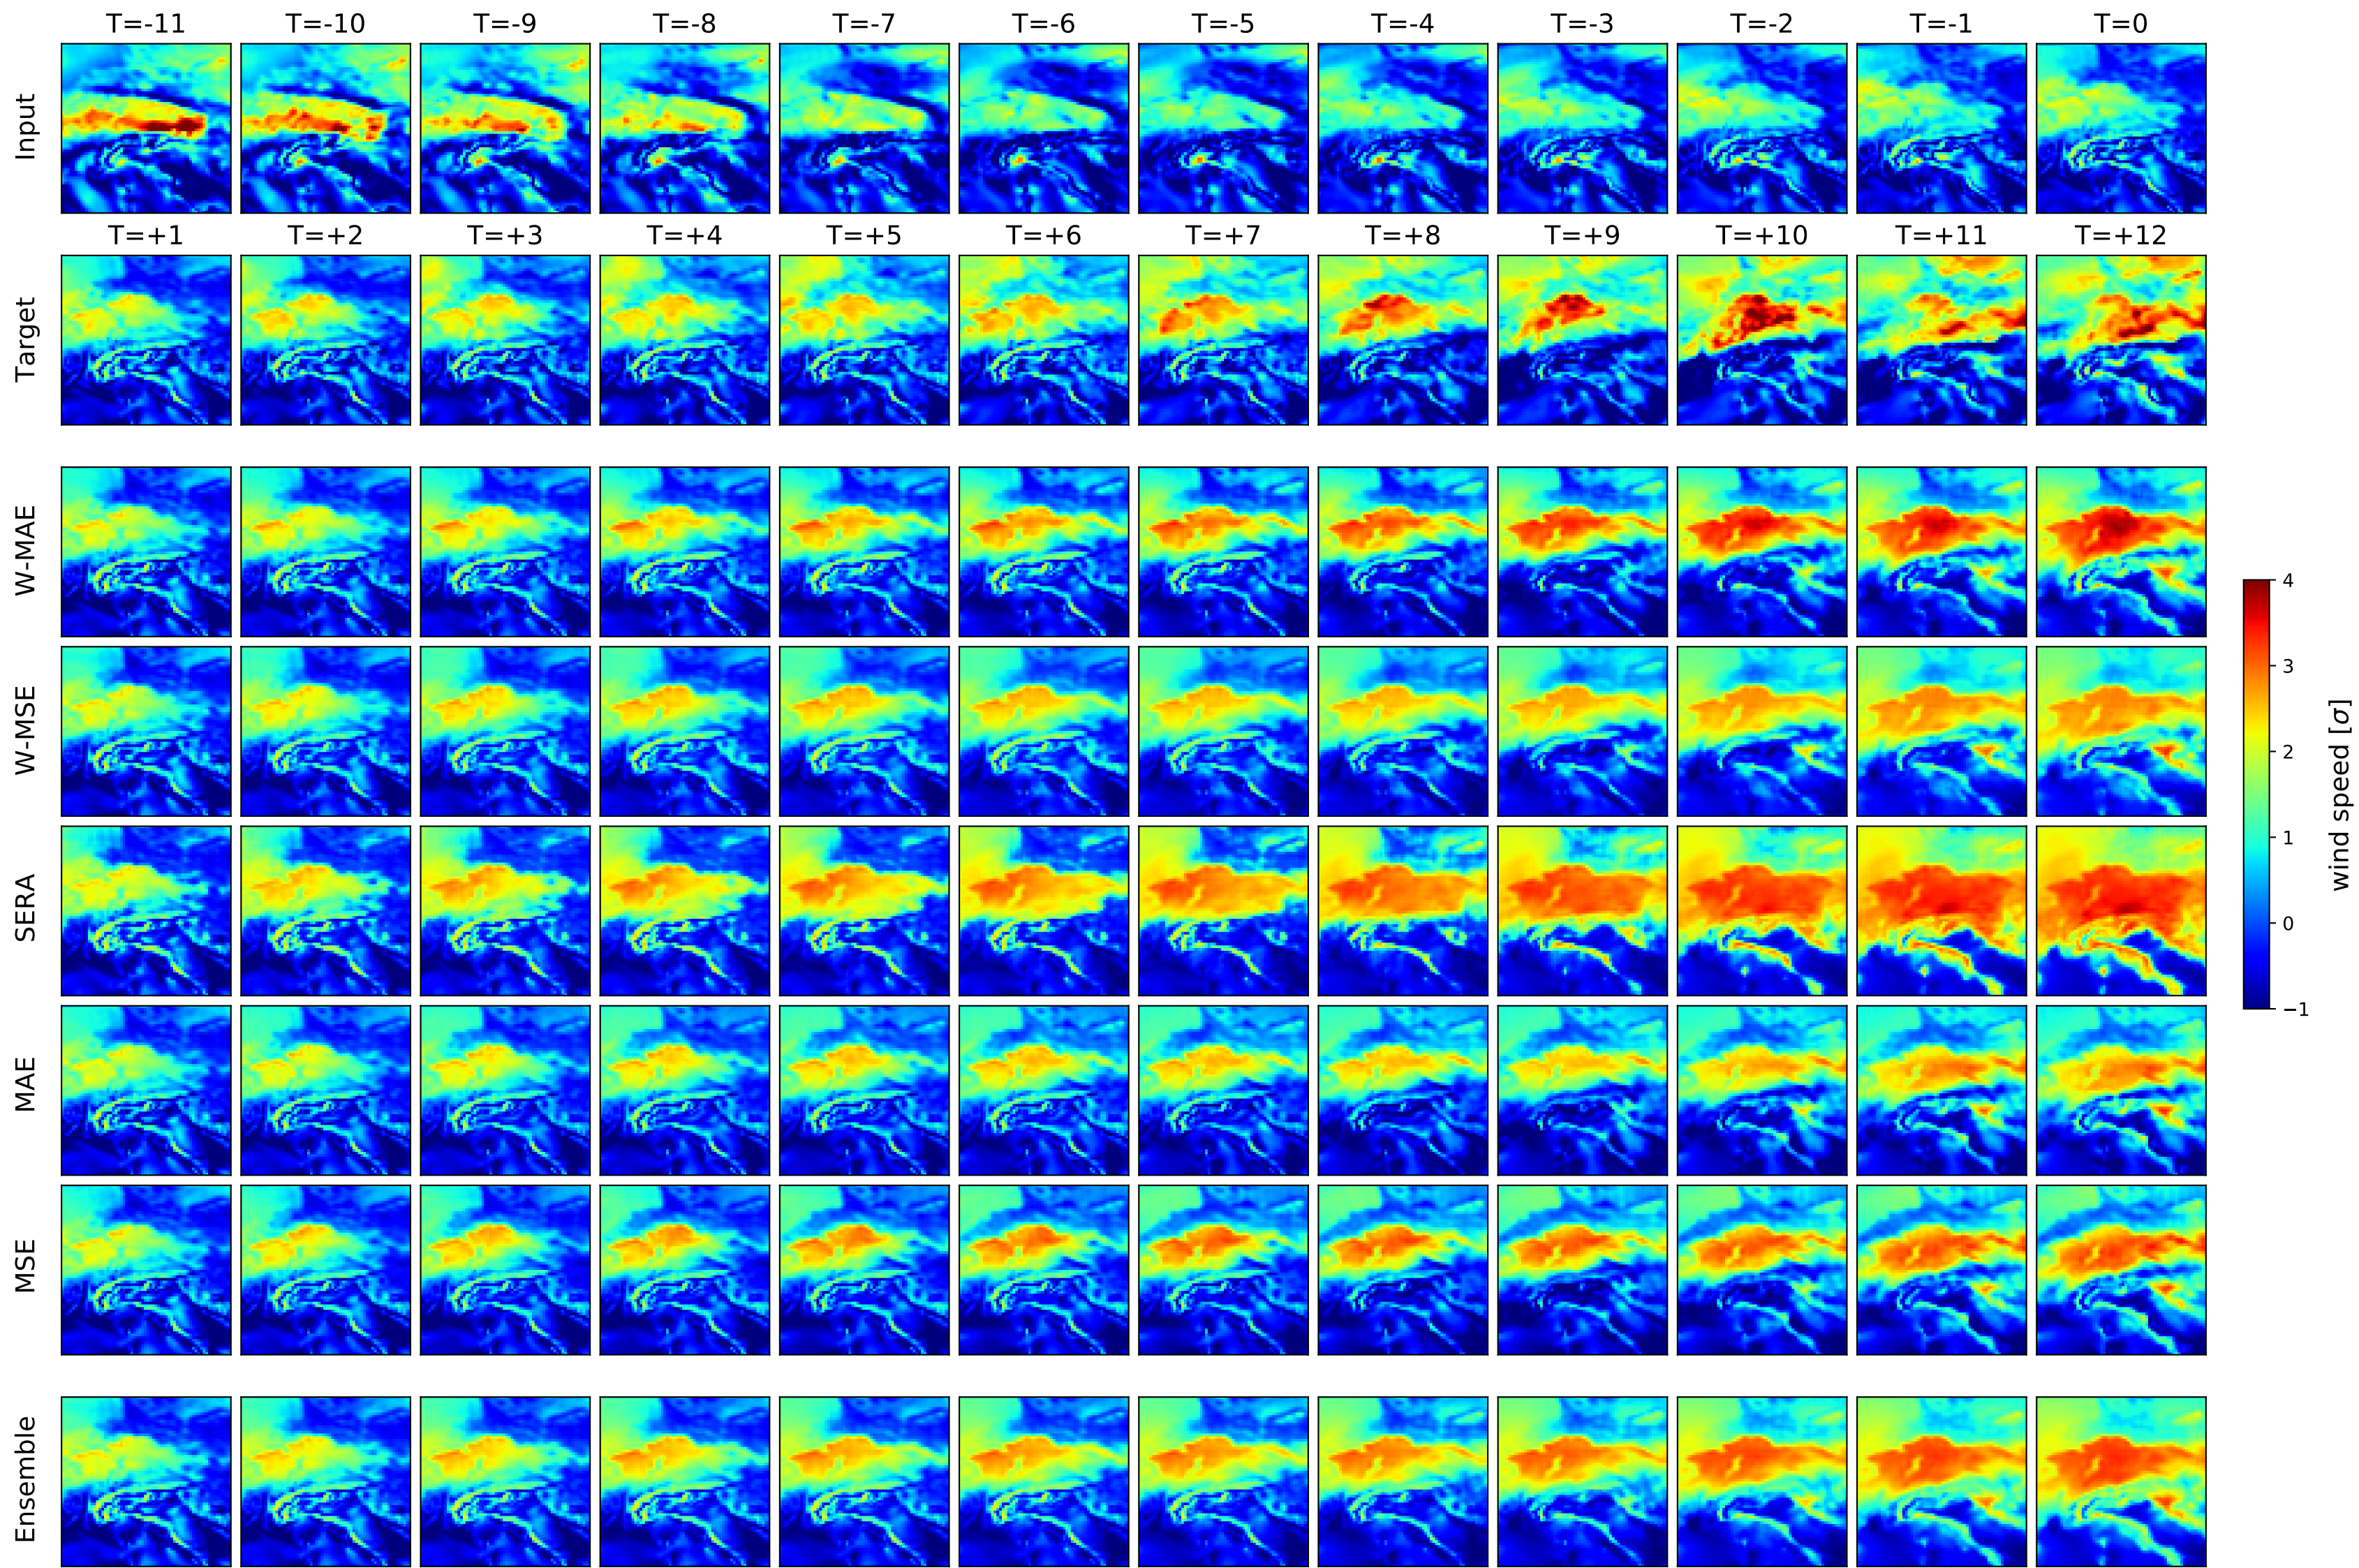

Supplement: Supplementary file 30 [file example_891.pdf › example_forecasts/example_891.pdf]

2019-02-09 00:00

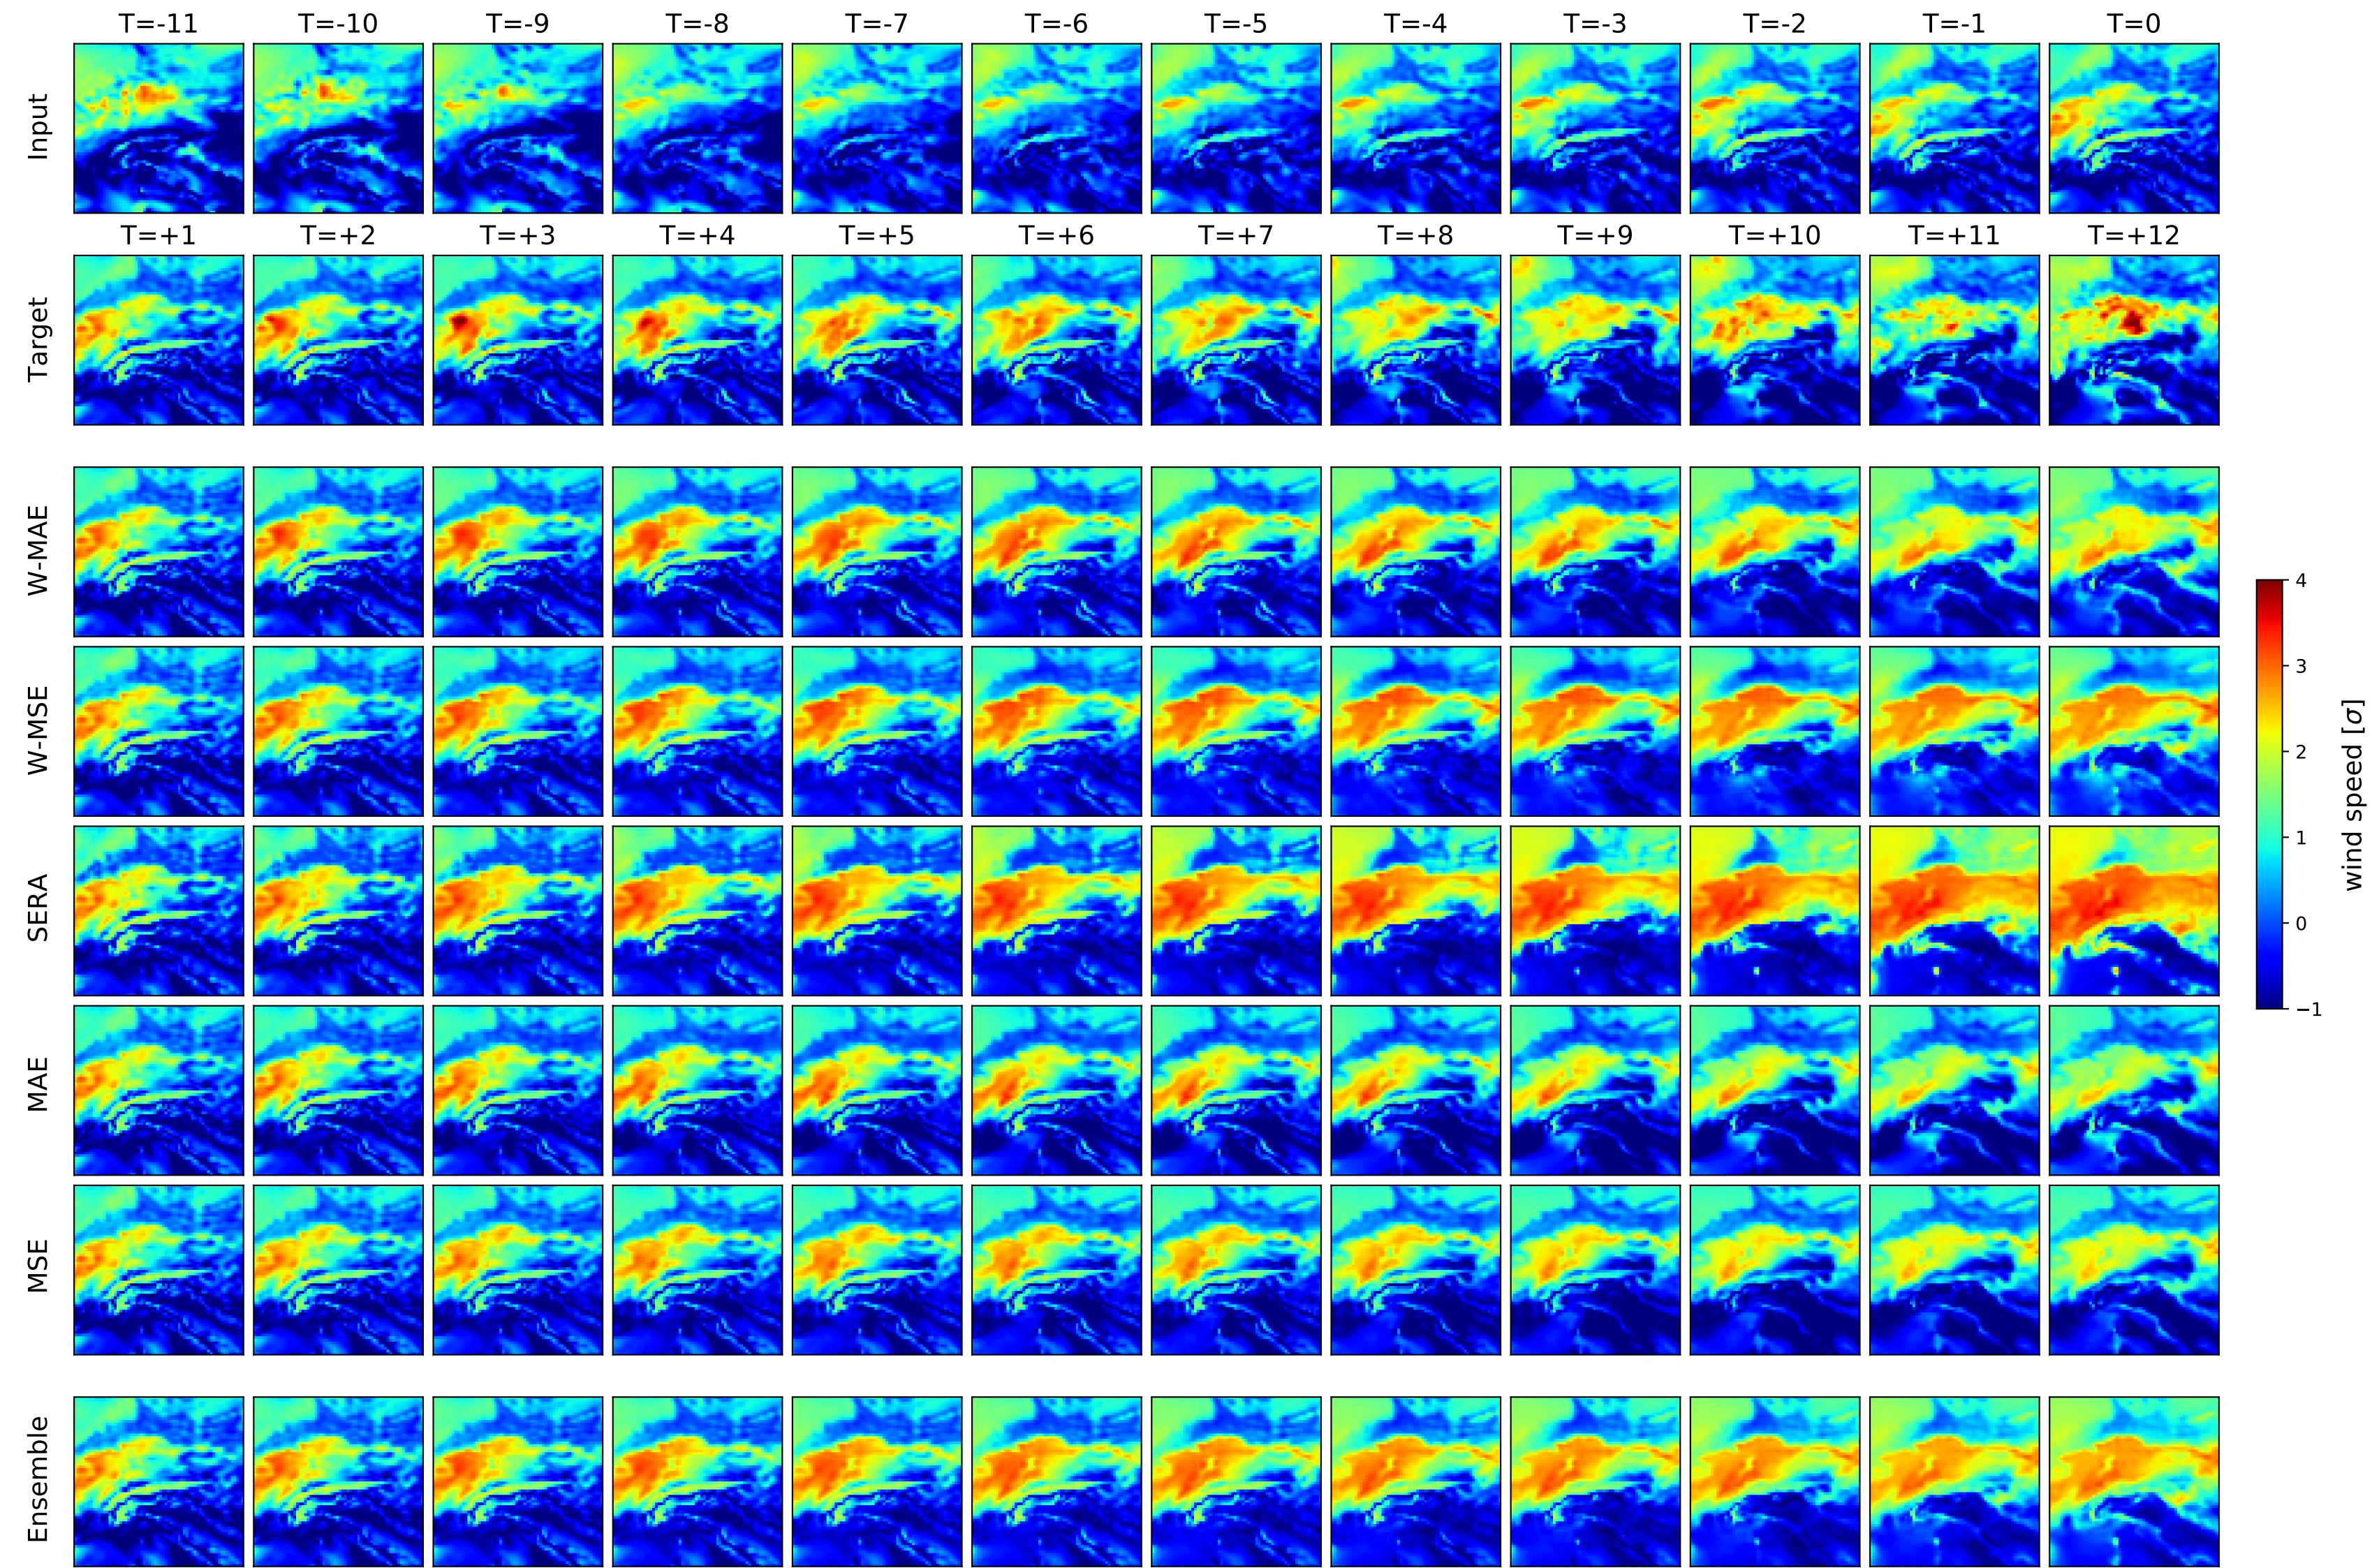

Supplement: Supplementary file 31 [file example_97.pdf › example_forecasts/example_97.pdf]

2019-02-10 00:00

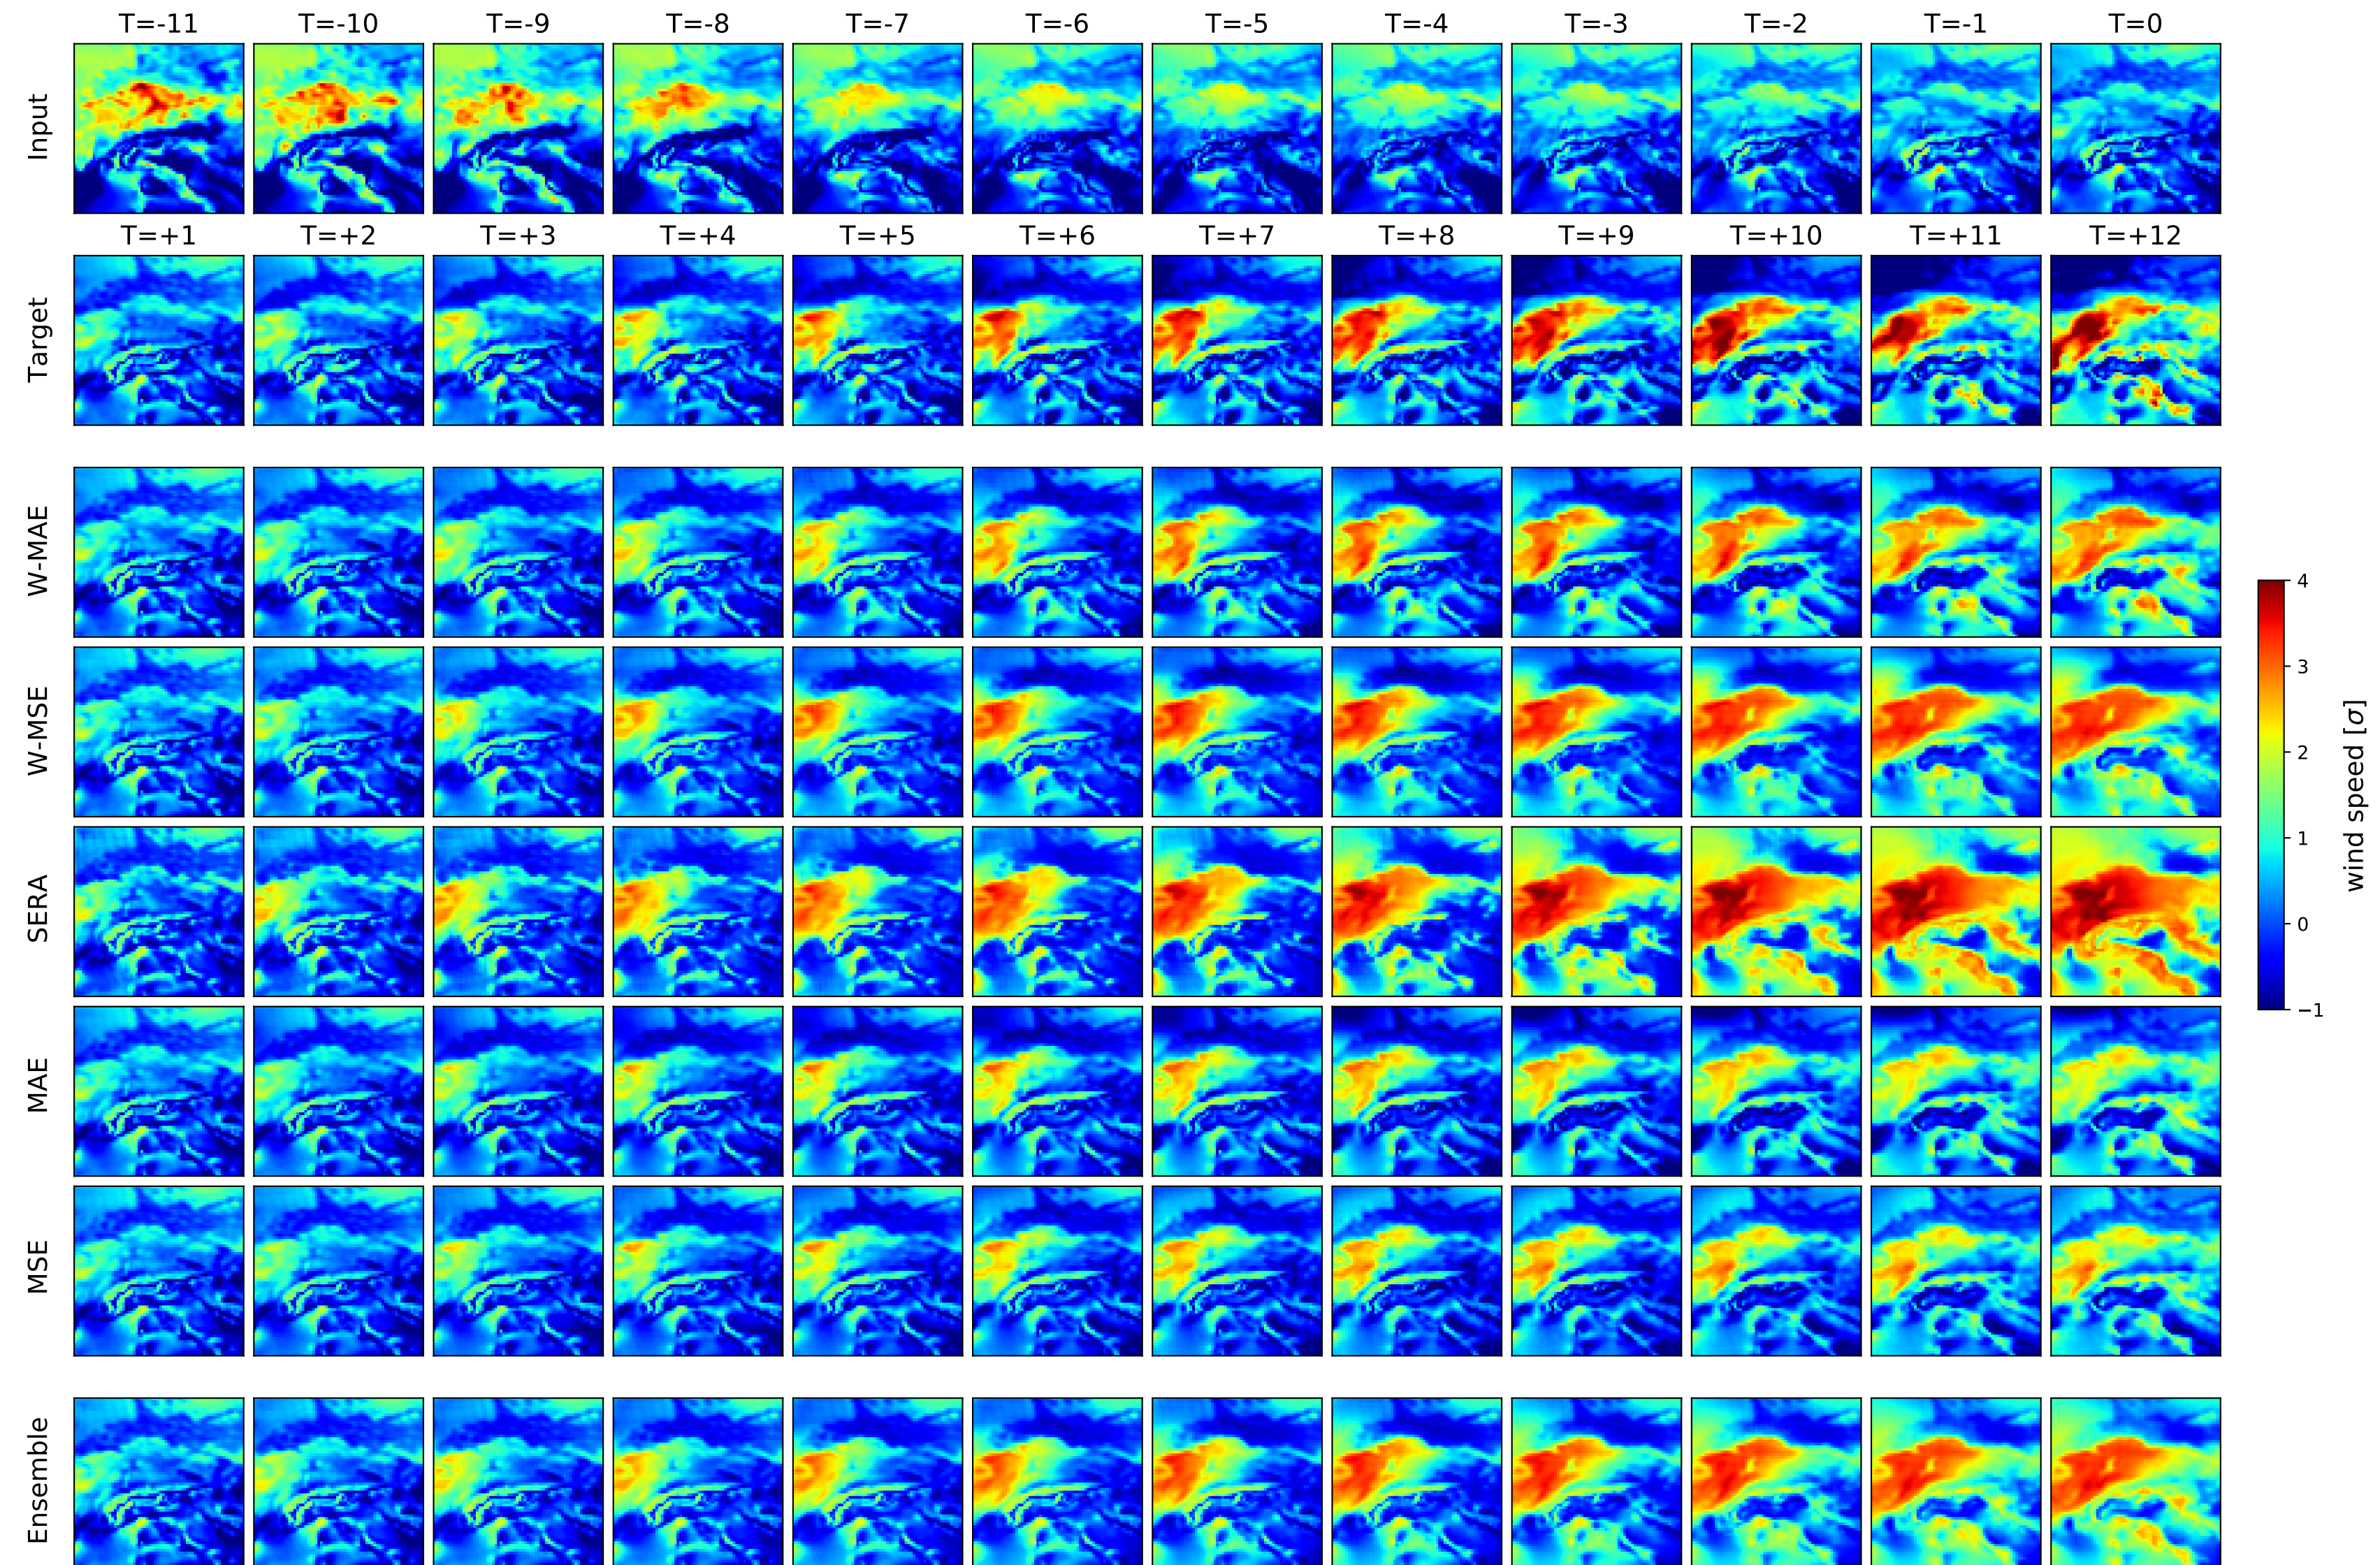

Supplement: Supplementary file 32 [file example_99.pdf › example_forecasts/example_99.pdf]
